# Supplementary material for: Early cave art and ancient DNA record the origin of European bison
Source: PubMed Central journal article supplement (PMC5071849; doi:10.1038/ncomms13158), 2016-10-18
Supplement: ncomms13158-s1.pdf [file ncomms13158-s1.pdf]

1 **Supplementary Figures**

2

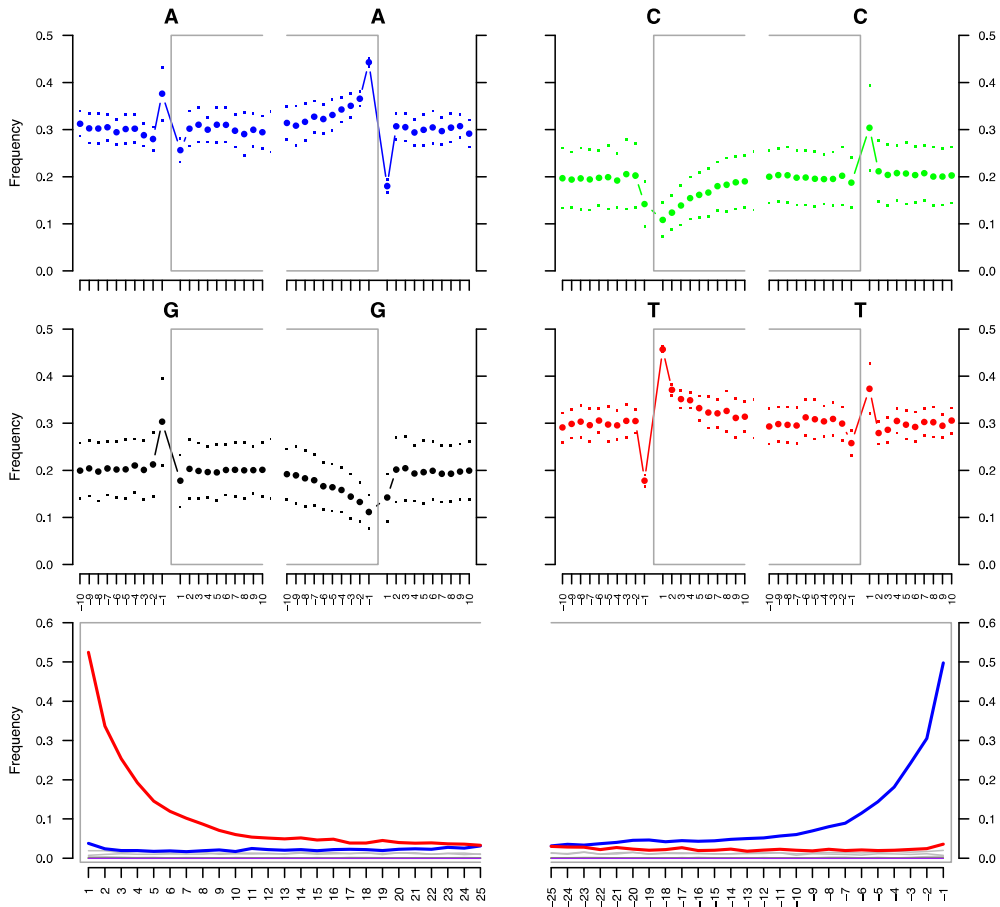

4

5 **Supplementary Fig 1.** Example of damage profile (sample LE257) obtained after sequencing of the  
6 whole mitochondrial genome using no treatment for the library preparation. As expected, there is an  
7 excess of purines found at the genomic position preceding the mapped reads, and an excess of C>T  
transitions at the first few positions of the reads.

mapDamage plot for library '4093A'

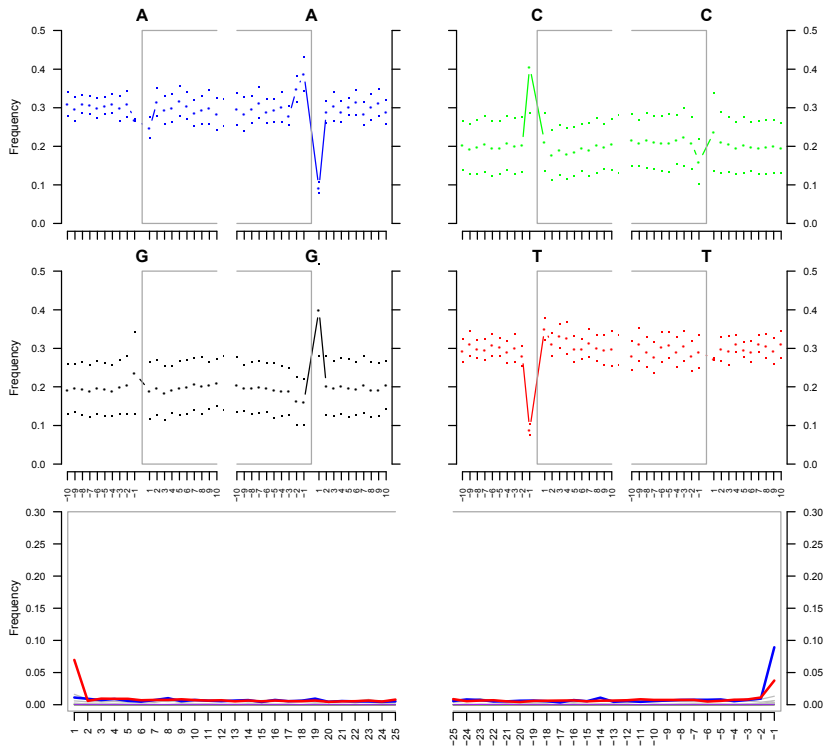

8

9 **Supplementary Fig 2.** Example of damage profile (sample A4093) obtained after sequencing of the  
10 whole mitochondrial genome using UDG-half treatment for the library preparation. As expected, there  
11 is an excess of cytosine found at the genomic position preceding the mapped reads, and an excess of  
12 C>T (and complementary G>A) transitions at the first (last) position of the reads.

13

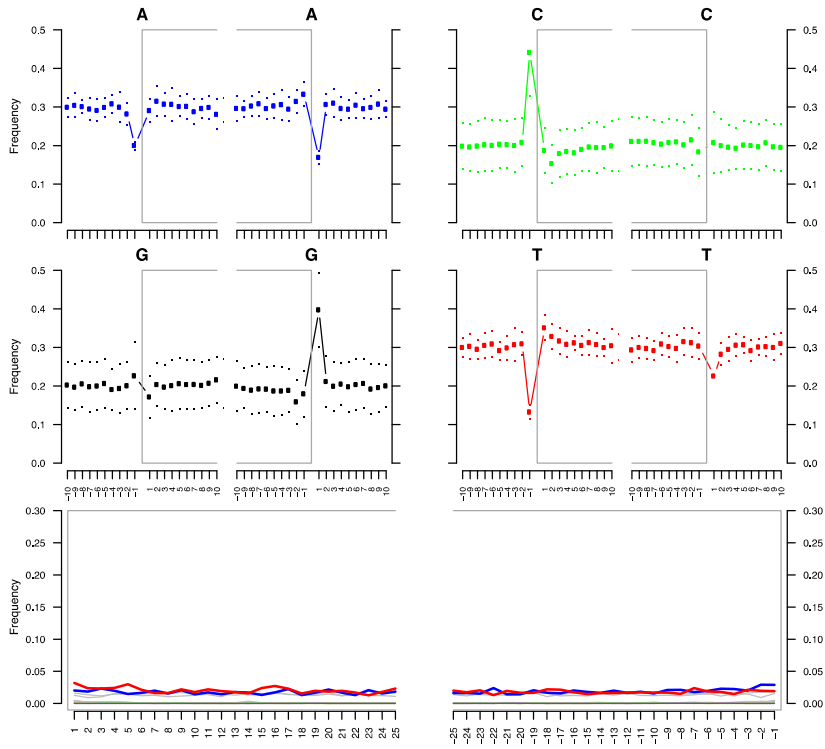

14

15 **Supplementary Fig 3.** Example of damage profile (sample A18) obtained after sequencing of the  
 16 whole mitochondrial genome using full USER treatment for the library preparation. As expected, there  
 17 is an excess of cytosine found at the genomic position preceding the mapped reads, and no excess of  
 18 C>T transitions at the start of the reads.

19

20

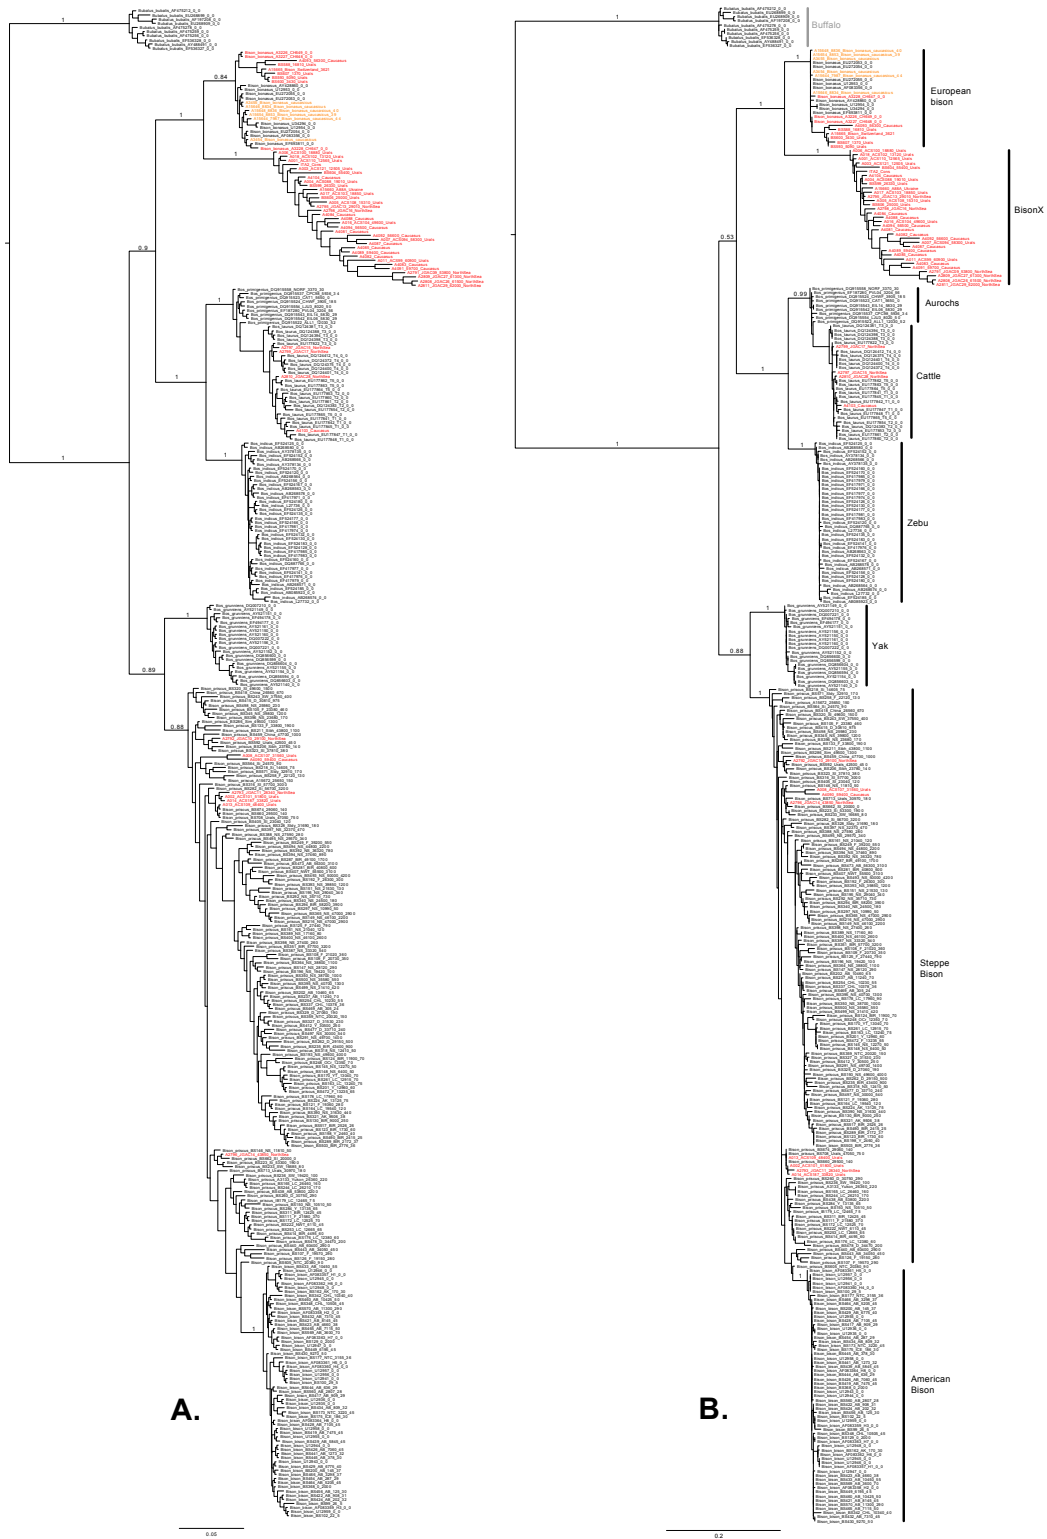

21  
22  
23  
24  
25

**Supplementary Fig 4.** Phylogenetic trees of mitochondrial control region sequences from 362 bovid samples. **A.** Majority-rule consensus tree from MrBayes. **B.** Maximum-likelihood tree from PhyML. The 60 newly sequenced individuals are in red font, with the Caucasian bison (*B. bonasus caucasicus*) in orange. Scale bars are given in substitutions per site.

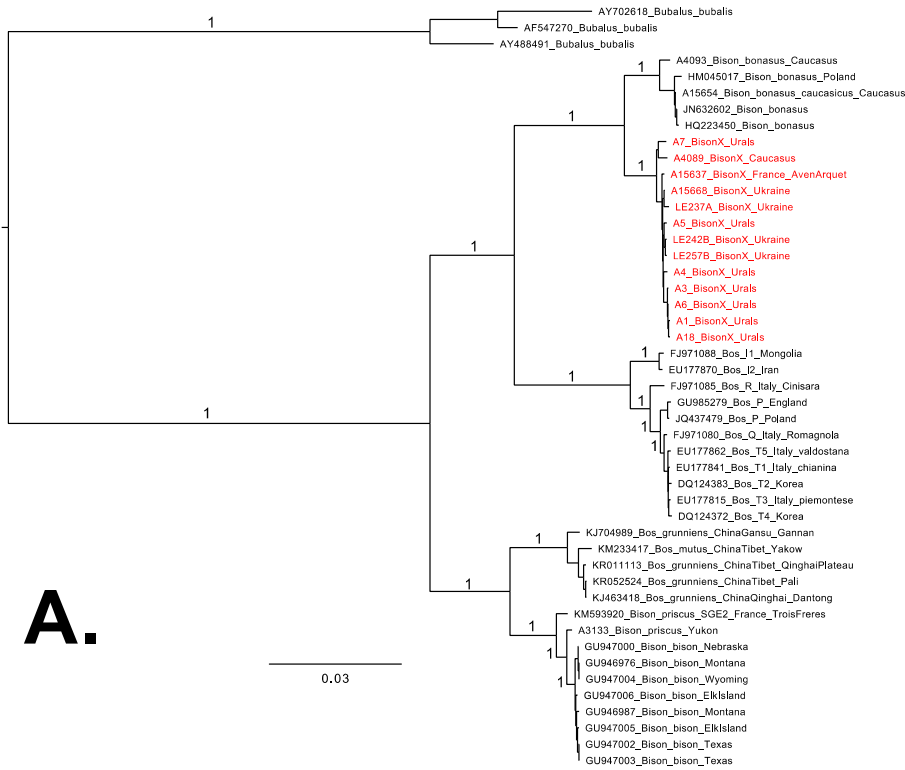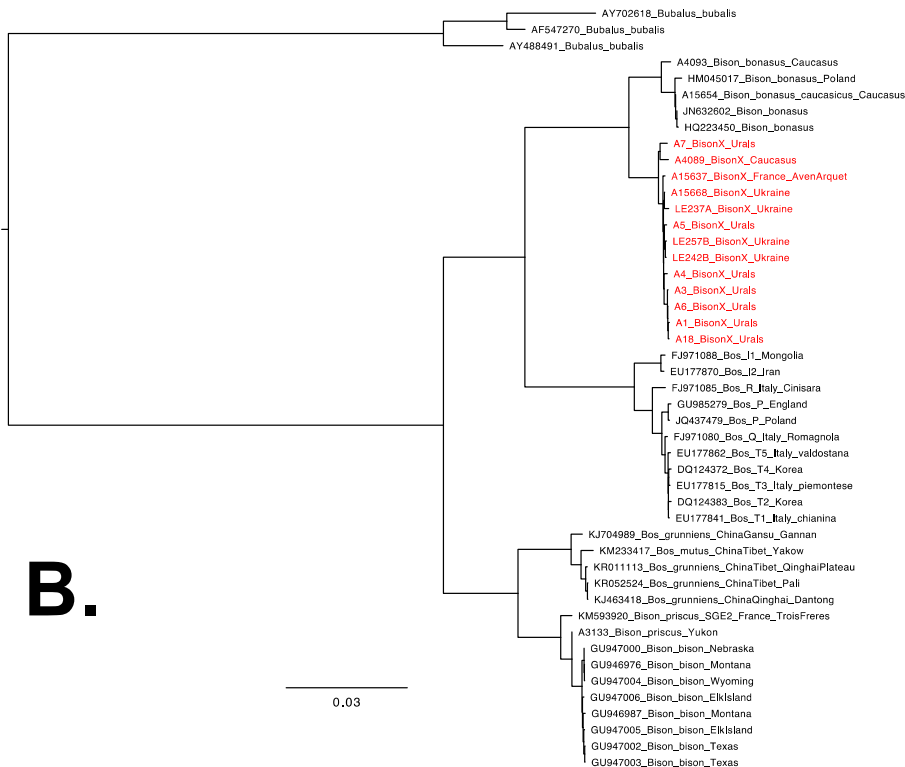

26

27

28

29

30

31

**Supplementary Fig 5.** Phylogenetic trees inferred from whole mitochondrial genomes. **A.** Majority-rule consensus tree from MrBayes. **B.** Maximum-likelihood tree from PhyML. CladeX bison individuals are colored in red. Scale bars are given in substitutions per site.

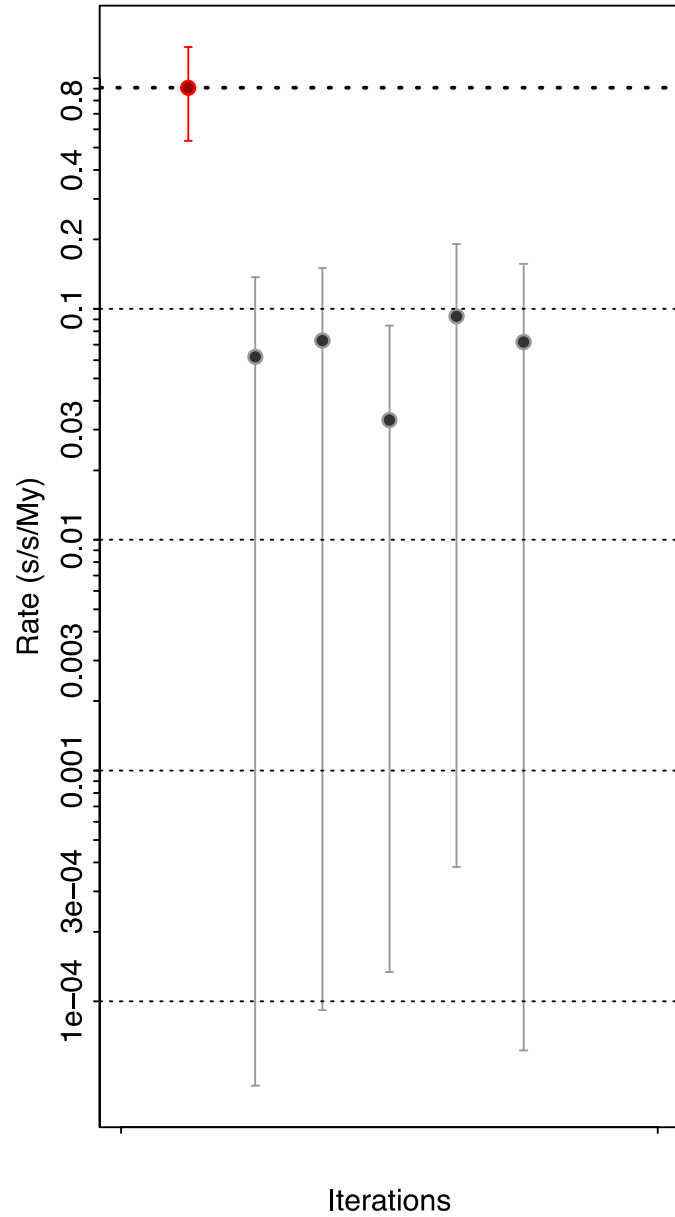

32  
33  
34  
35  
36  
37  
38  
39

**Supplementary Fig 6.** Date-randomization test. The red circle and dotted line represent the mean estimate of the molecular rate obtained in the phylogenetic analysis of wisent and CladeX, calibrated using the radiocarbon dates associated with the ancient sequences. The grey lines represent the 95% HPD intervals of rates estimated with randomized dates. None of these margins overlap with the mean rate estimate from the original data set, demonstrating that the radiocarbon dates used for this study contain sufficient temporal information for calibrating the molecular clock.

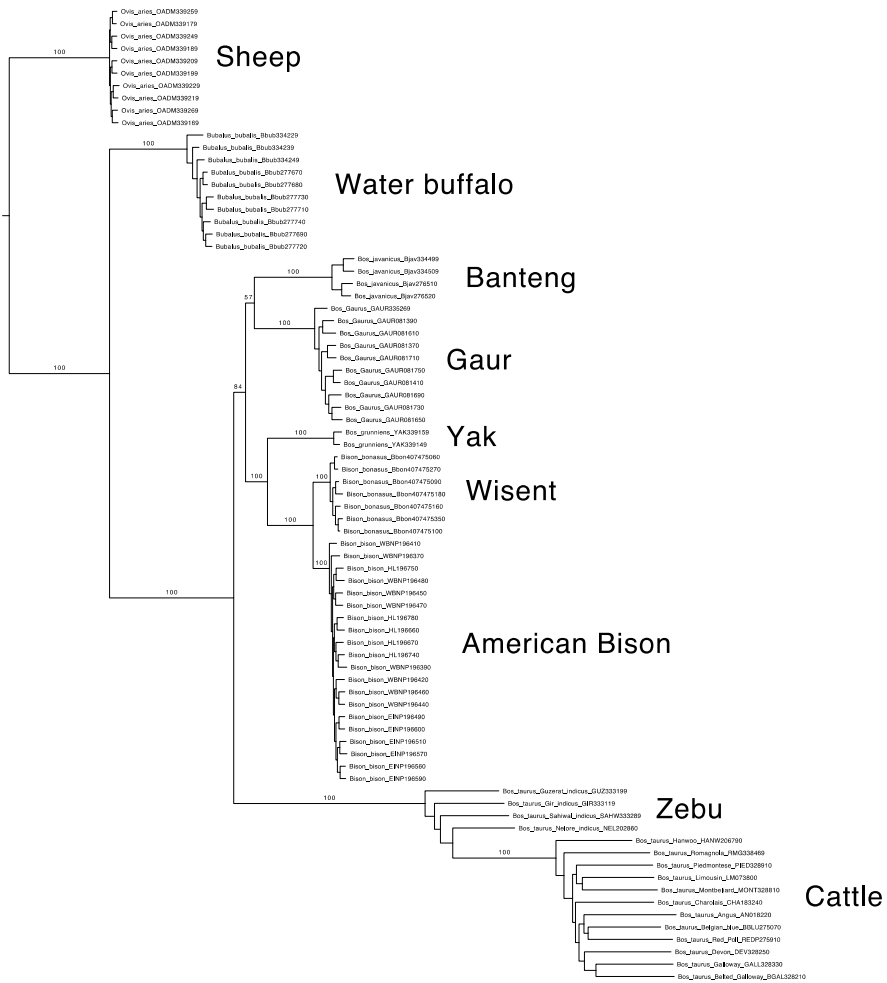

40  
41  
42  
43

**Supplementary Fig 7.** Maximum-likelihood phylogeny of modern bovid species (and sheep as outgroup) from ~40k nuclear loci.

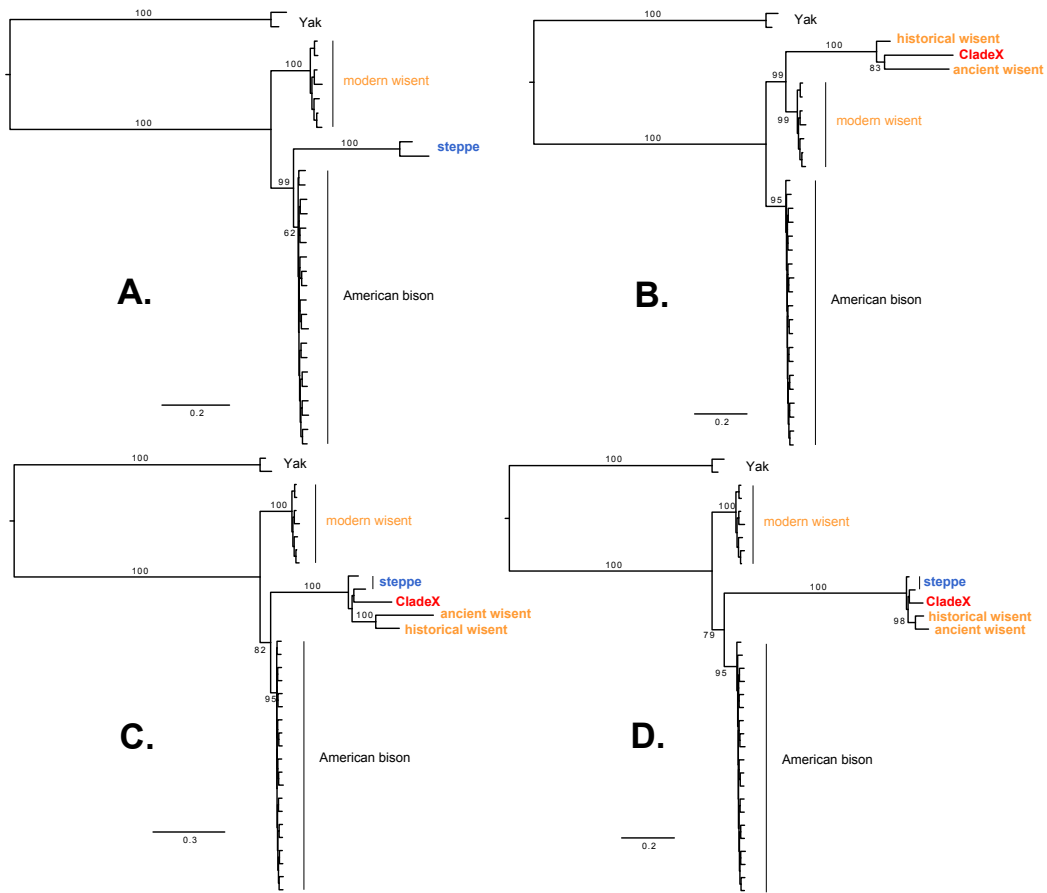

44

45 **Supplementary Fig 8.** Maximum-likelihood phylogenies of modern and ancient bison (and yak as  
 46 outgroup), from ~10k nuclear loci. **A.** Phylogeny including the two ancient steppe bison. **B.** Phylogeny  
 47 including the three pre-modern wisent. **C.** Phylogeny including the two steppe bison and three pre-  
 48 modern wisent (ancient, historical and CladX). **D.** Replicate of C. but only using transversions for the  
 49 non-modern samples.

50

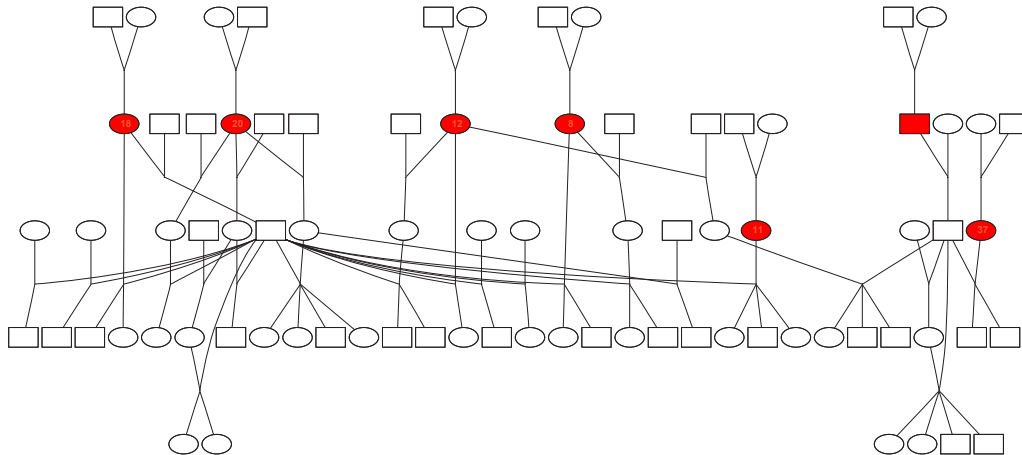

51

52 **Supplementary Fig 9.** Pedigree of wisent from the Białowieża Forest (Poland), from which seven  
 53 genotyped individuals (in red) were included in the present study.

54



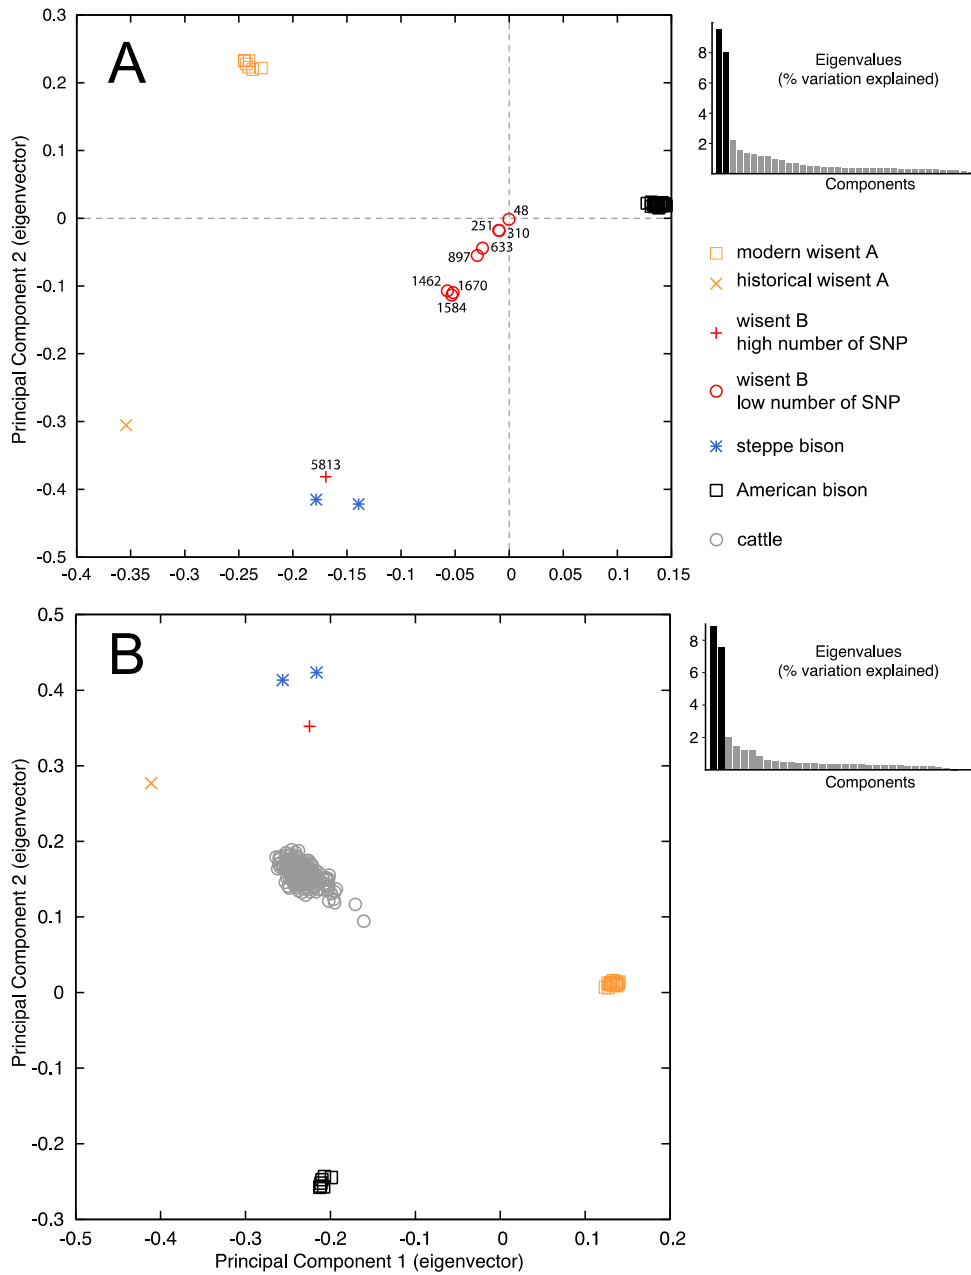

55

56 **Supplementary Fig 10:** A) Principal Component Analysis for nine CladeX individuals (including  
 57 sample A006), one historical wisent, one ancient wisent, two steppe bison, seven modern wisent and 20  
 58 American bison. The numbers on the plot report the number of loci called for the individuals clustering  
 59 towards zero coordinates (from Supplementary Table 2). Eigenvector 1 explains 9.58% of the variation,  
 60 while eigenvector 2 explains 7.96% of the variation. B) Same Principal Component Analysis as Figure  
 61 3C with cattle individuals from Decker et al. (2009) projected onto original components.

62

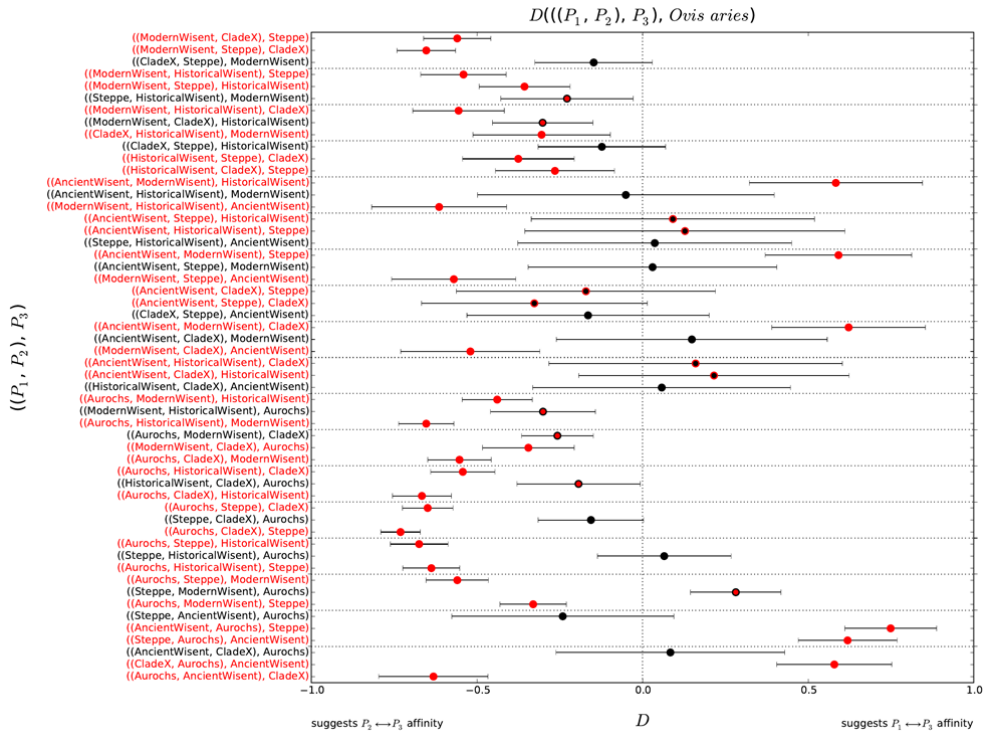

63 **Supplementary Fig 11:** Topology testing using D statistics, with sheep as outgroup. The topology  
 64 being tested is shown on the vertical axis, with the most parsimonious of three possible topologies  
 65 written in black. Data points that are significantly different (more than three standard errors)  
 66 are shown in red. The data point representing the topology closest to zero, amongst a set of three  
 67 possible topologies, is shown with a black outline. Error bars are three standard errors either side of the  
 68 data point, where the standard error was calculated using a block jackknife.

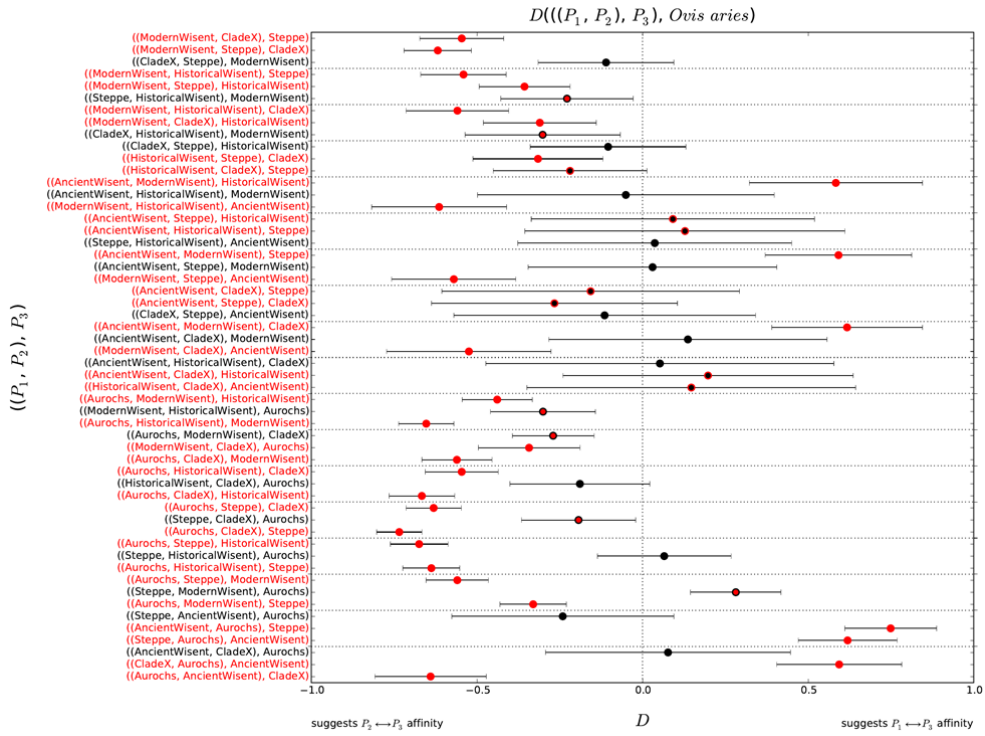

69 **Supplementary Fig 12:** Topology testing using D statistics, with sheep as outgroup. As in  
 70 Supplementary Figure 11, except that sample A006 has been omitted from the CladeX group.

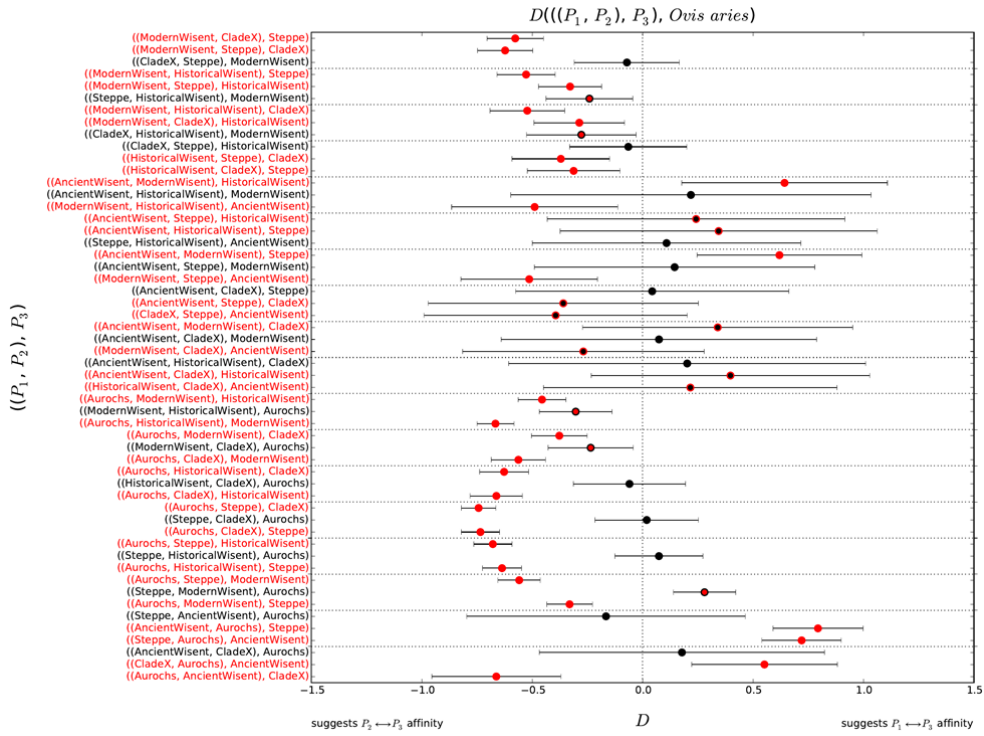

71 **Supplementary Fig 13:** Topology testing using D statistics, with sheep as outgroup. As in  
 72 Supplementary Figure 11, except that genotypes called from read depths <2 have been omitted for  
 73 extinct individuals.

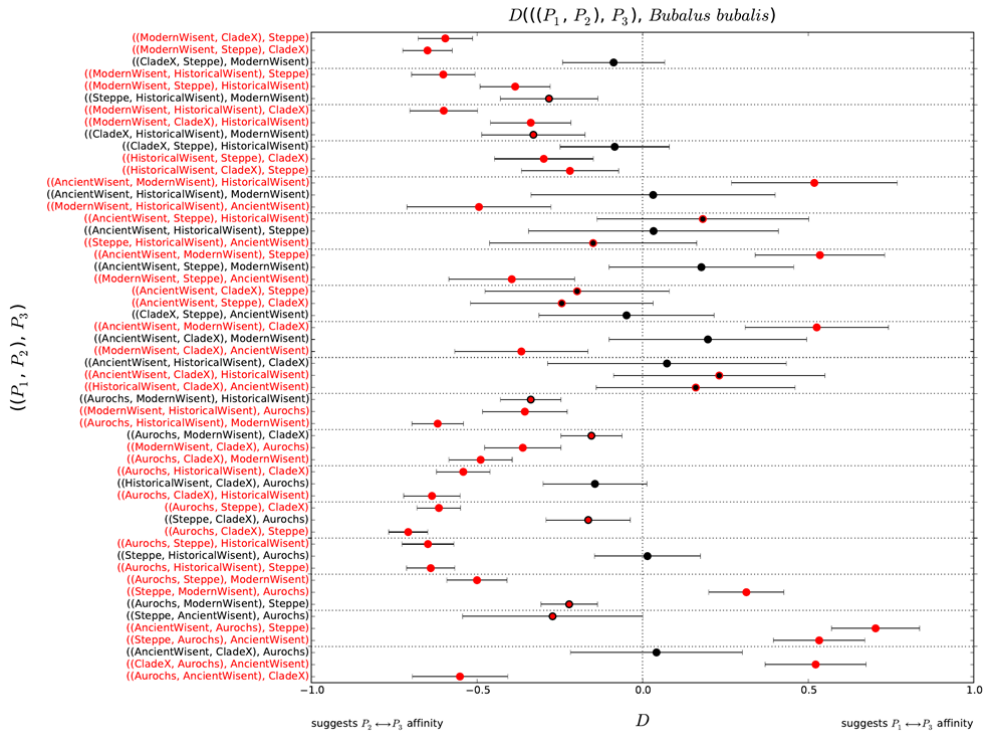

74 **Supplementary Fig 14:** Topology testing using D statistics, with Asian water buffalo as outgroup. As  
 75 in Supplementary Figure 11, except the outgroup has been changed.

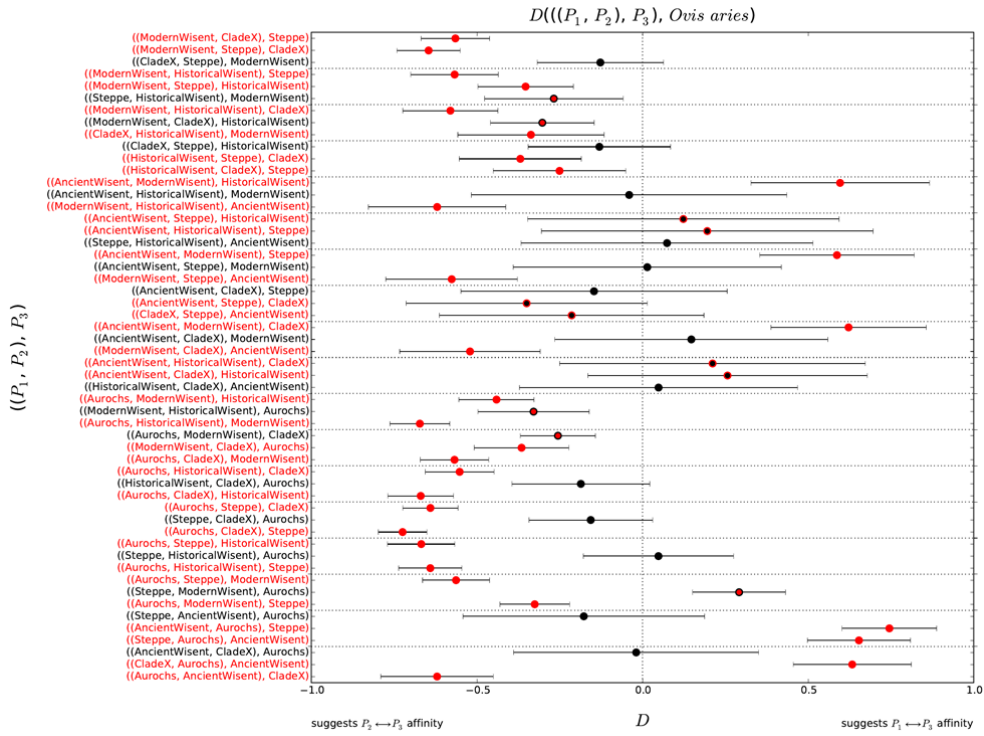

76 **Supplementary Fig 15:** Topology testing using D statistics, with sheep as outgroup. As in  
 77 Supplementary Figure 11, except in extinct individuals, alleles have been randomly sampled from sites  
 78 called as heterozygotes to simulate haploid sampling.  
 79  
 80  
 81

82

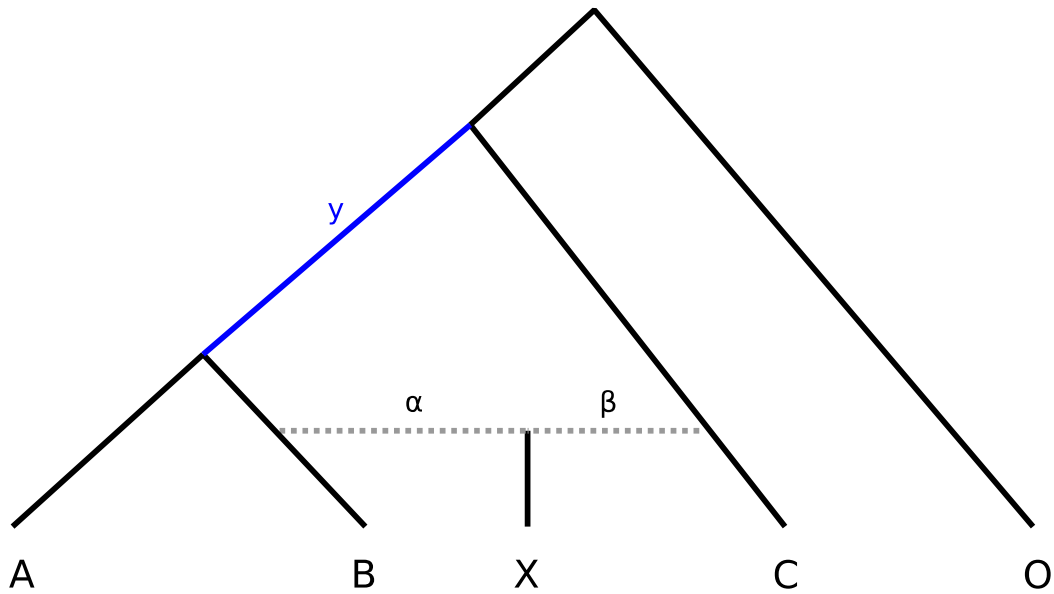

83

84

85

**Supplementary Fig 16:** An admixture graph showing the ancestry of X, where  $\alpha$  is the proportion of ancestry from B and  $\beta=1-\alpha$  is the proportion of ancestry from C.

86

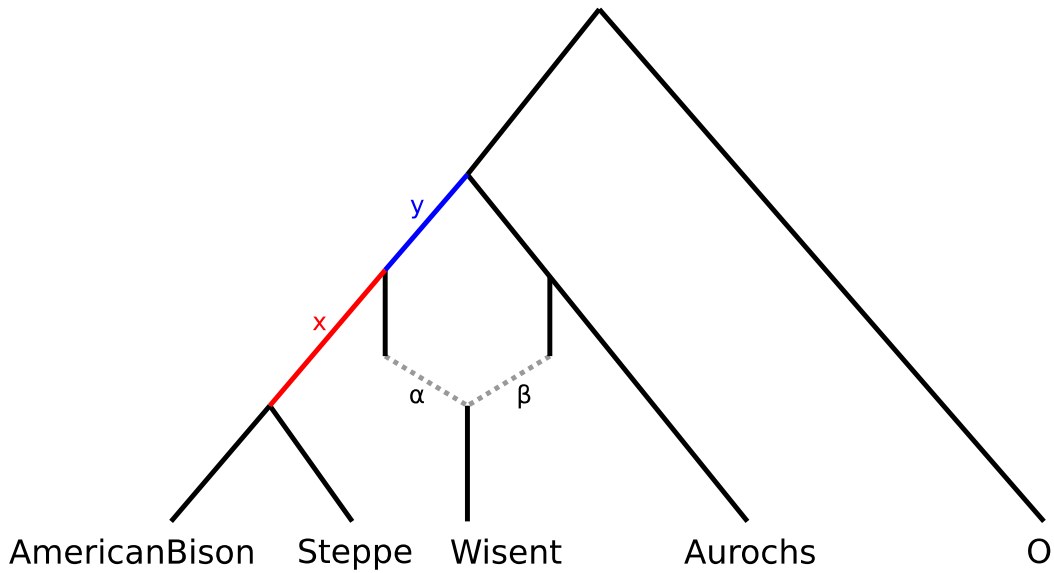

87

88

89

90

91

92

**Supplementary Fig 17:** An admixture graph showing the ancestry of the wisent, where  $\alpha$  is the proportion of ancestry from steppe and  $\beta=1-\alpha$  is the proportion of ancestry from aurochs.

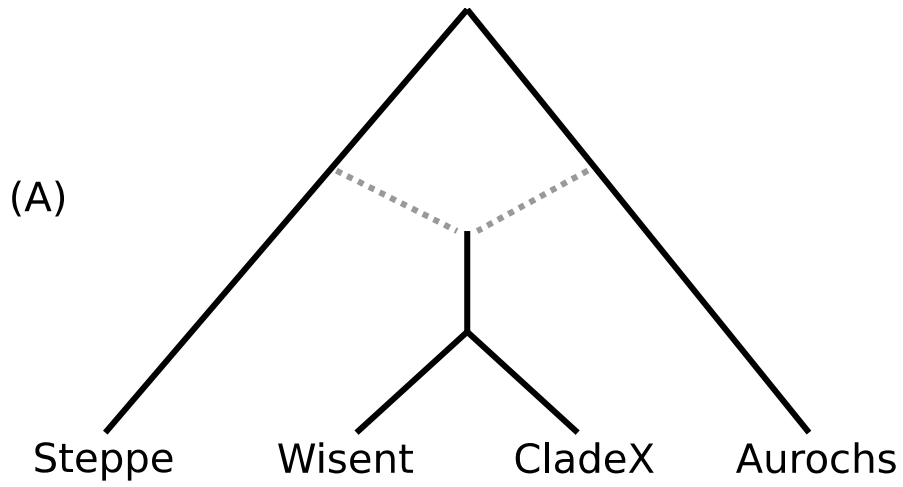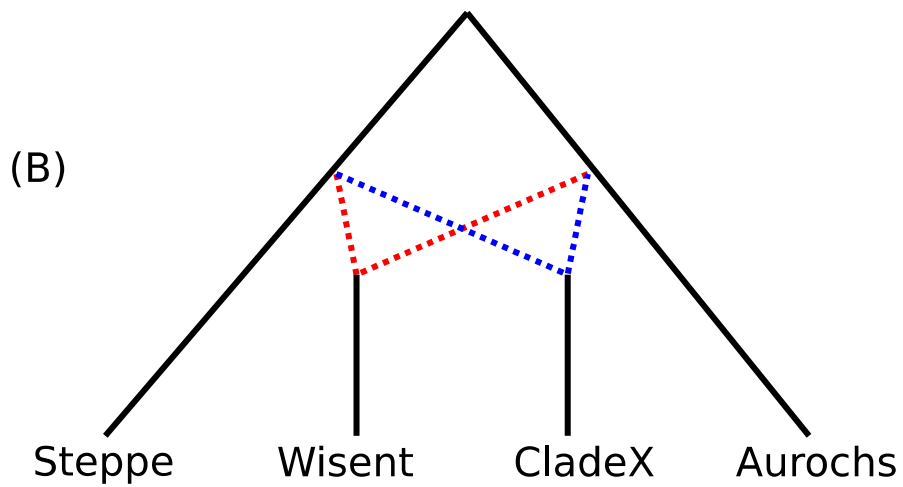

93  
94  
95  
96  
97  
98

**Supplementary Fig 18:** Admixture graphs representing (A) a single hybridisation event prior to the divergence of the wisent, and (B) two independent hybridisation events leading to a wisent clade and a CladeX.



# Topology $X_1$

# Topology $X_2$

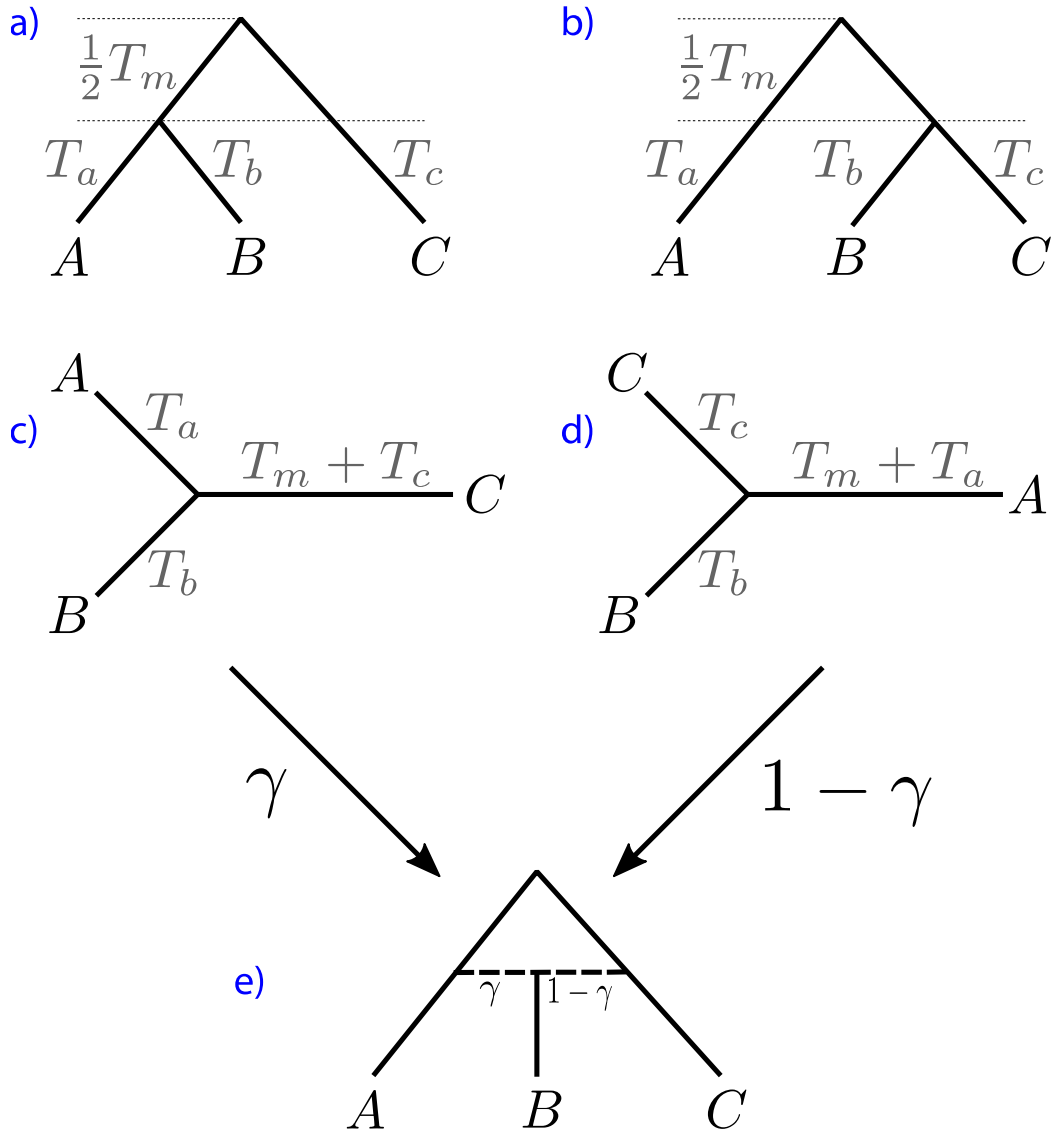

99  
100  
101  
102  
103  
104

**Supplementary Fig 19:** A hybrid species tree (e), where individual B is a hybrid of A and C lineages, has two contributing species trees, (a) topology  $X_1$ , and (b) topology  $X_2$ , with proportion  $\gamma$  from topology  $X_1$  and proportion  $1 - \gamma$  from topology  $X_2$ . The unrooted gene trees are shown for (c) topology  $X_1$ , and (d) topology  $X_2$ . Branch lengths  $T_a, T_b, T_c$  and  $T_m$  have units  $2N_e\mu$  generations.

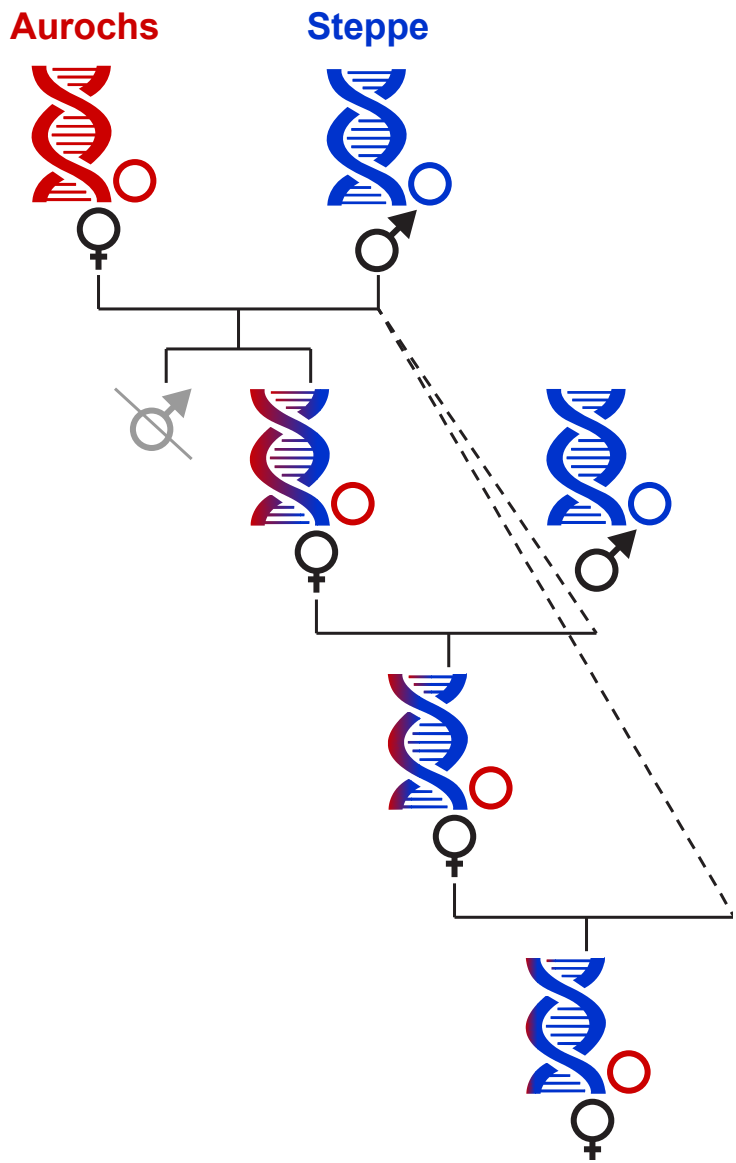

105  
 106  
 107  
 108  
 109  
 110

**Supplementary Fig 20.** Schematic representation of asymmetrical hybridisation between female aurochs and male steppe bison, and its genetic imprint on both nuclear and mitochondrial genomes after a few generations. The coloured double helix represents the nuclear genome, while the circles represent the strictly maternally inherited mitochondrial genome.

111

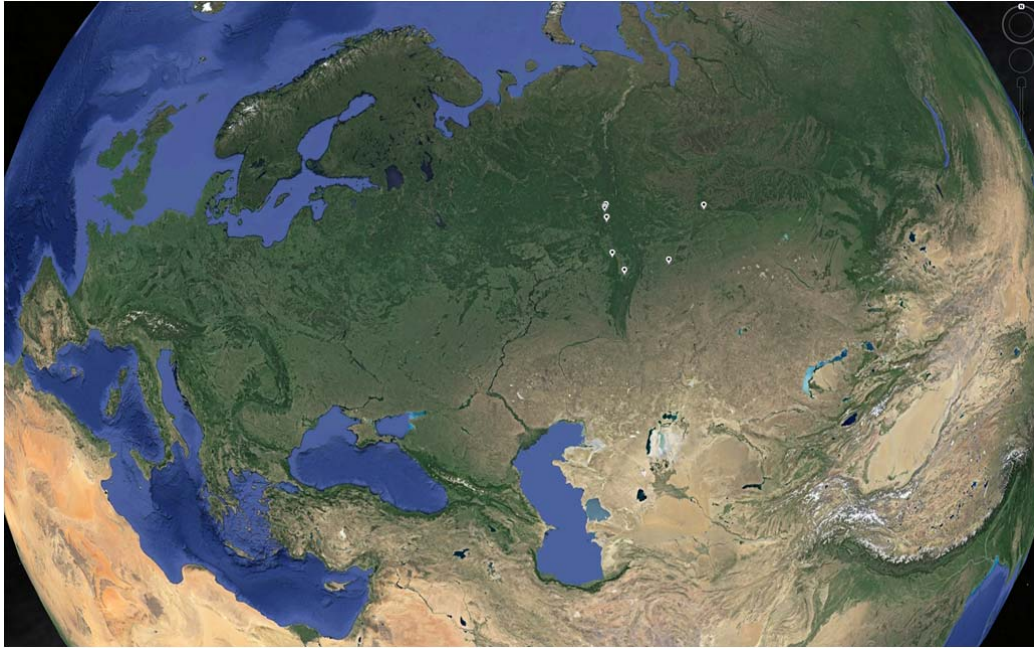

112  
113  
114  
115

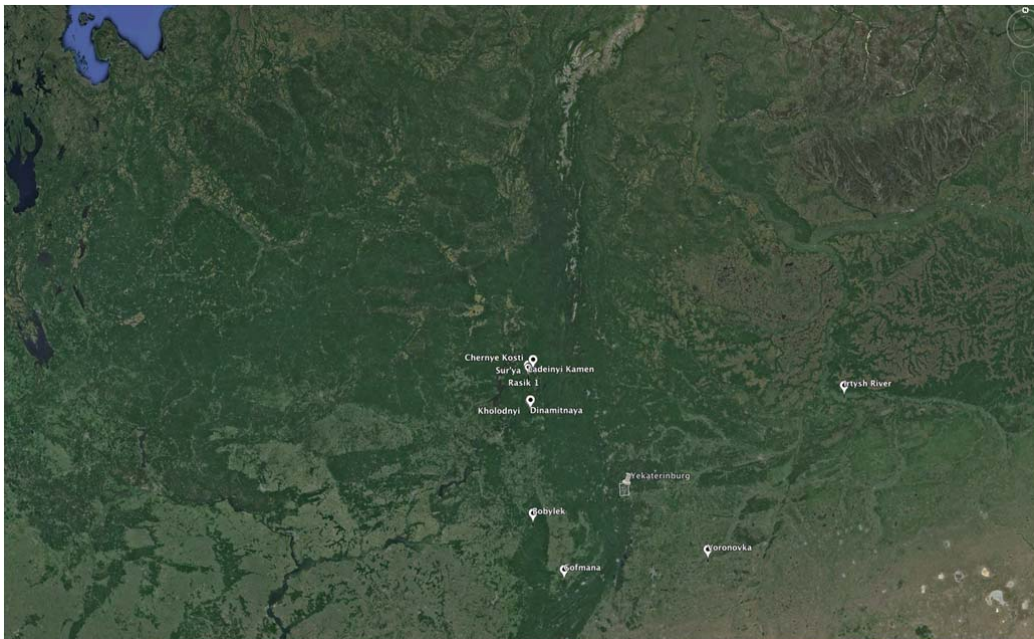

**Supplementary Fig 21. Location of all cave sites from which bison samples have been genotyped in the Ural region.**

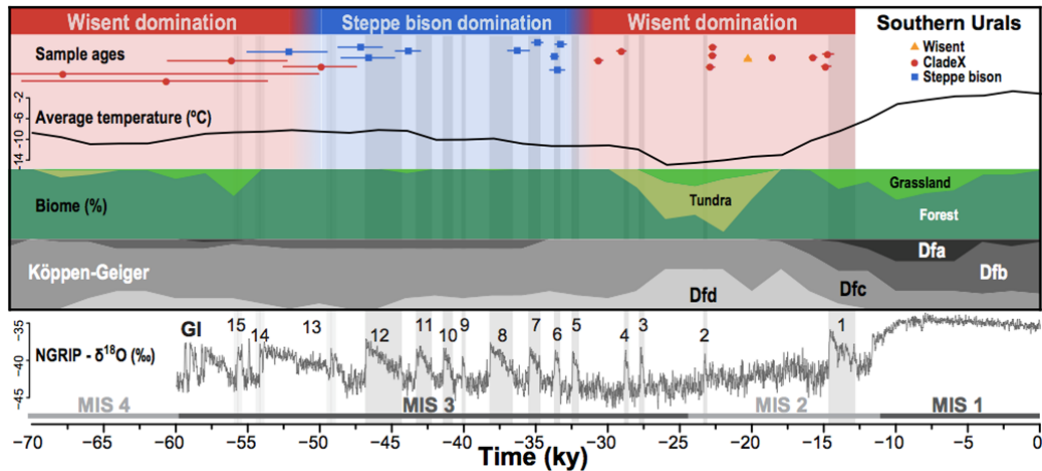

116

117 **Supplementary Fig 22. Chronology of the Urals samples showing a series of replacement patterns**  
 118 **that correlate with climate events.** Individual calibrated AMS dates are plotted on top of the NGRIP  
 119  $\delta^{18}\text{O}$  record<sup>1</sup>. Greenland Interstadials (GI) are numbered in black, and Marine Isotope Stages (MIS) in  
 120 grey. Inferred average temperature, biome reconstruction and proportion of the area for different  
 121 Köppen climate classes are shown for the exact region where bison were sampled in southern Urals  
 122 (Köppen classes: D for ‘snow’, f for ‘fully humid’, then a=hot summer; b=warm summer; c=cool  
 123 summer; d=extremely continental). The most recent population replacement between wisent and steppe  
 124 bison occurs around 32-33 ky, when major environmental transitions are also observed: 1) Globally, as  
 125 shown on the NGRIP record with the last major interglacial event (GI 5) before a long period of cold  
 126 climate; but also 2) Locally, as shown on both the average temperature and biome reconstructions. In  
 127 this situation, wisent are associated with a cooler climate and the presence of tundra-like vegetation.  
 128 Although dating resolution is degrading for deeper time, a similar shift is apparent around 50-52 kya.  
 129 Steppe bison occupied this environment in MIS 3, but have not been detected after this stage and  
 130 indeed were in a severe population decline by GI 1<sup>2</sup>.  
 131

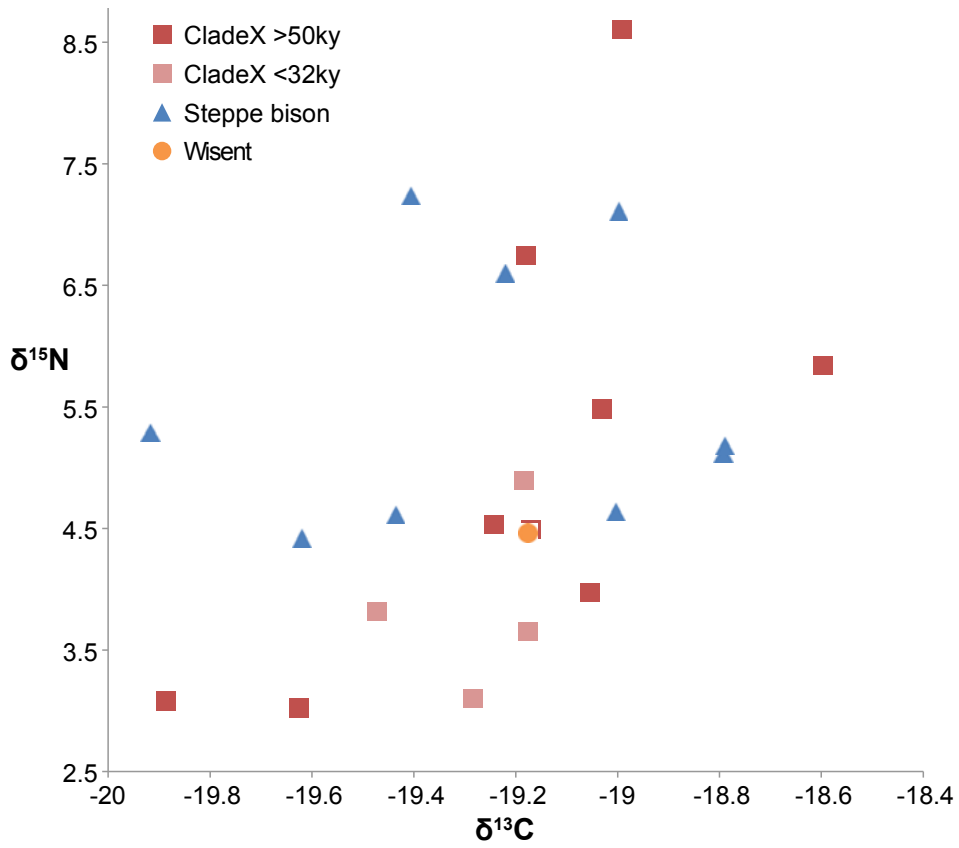

132  
 133  
 134  
 135

Supplementary Fig 23. Stable  $\delta^{13}\text{C}$  and  $\delta^{15}\text{N}$  isotope values for all genotyped bison sampled from the Ural region.

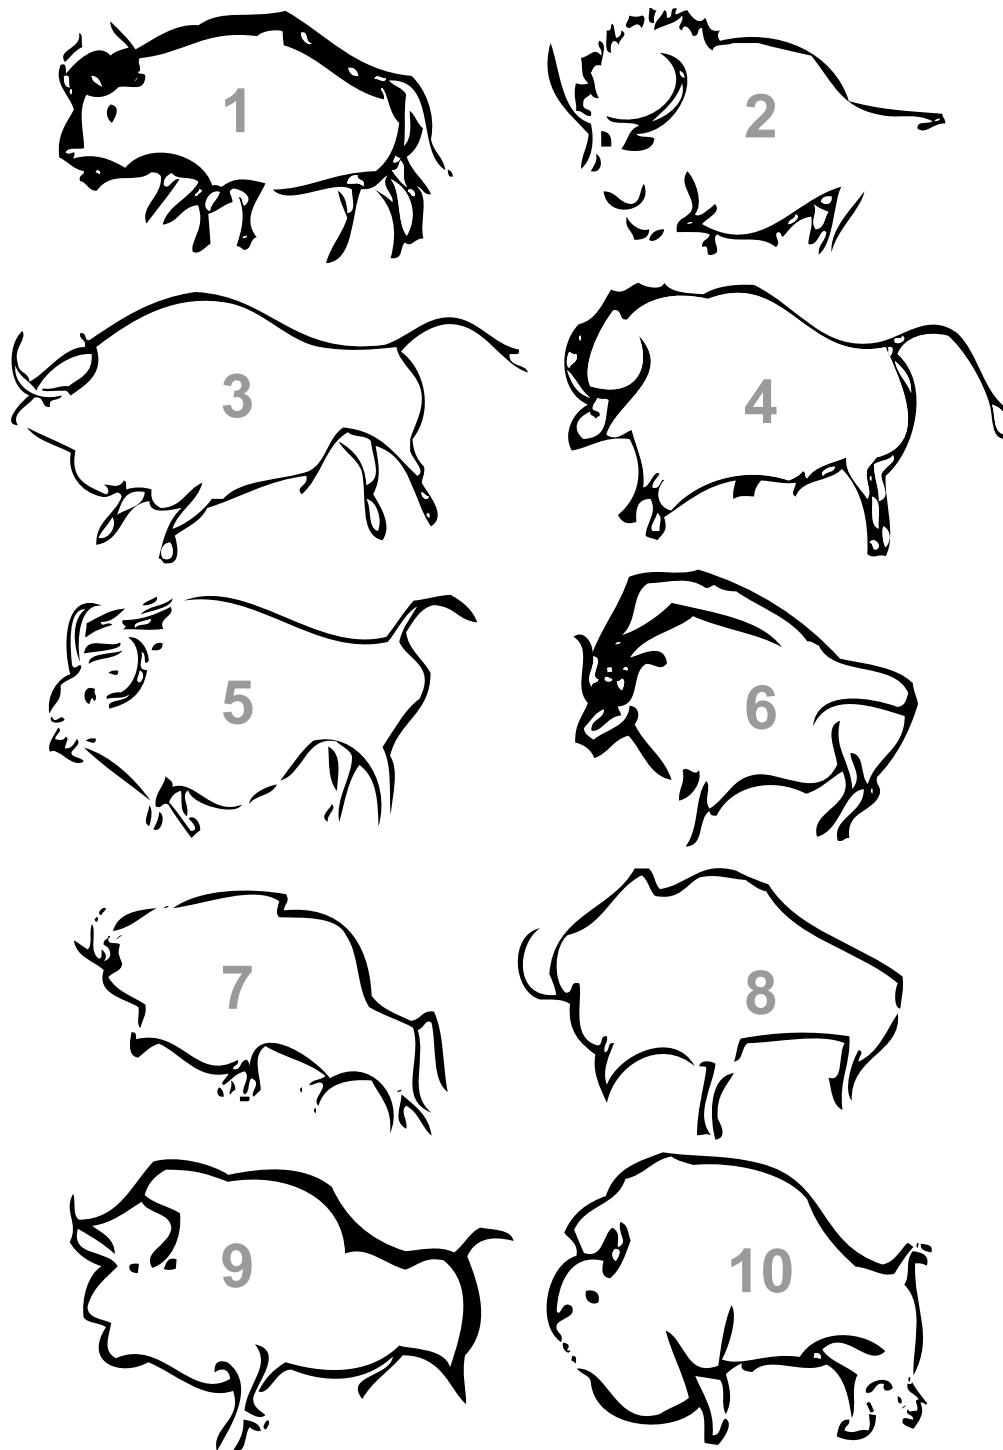

136

137 **Supplementary Fig 24. Steppe-like morphologies.** In European Palaeolithic art, some bison  
 138 depictions show morphological traits and anatomical details compatible with the morphology of steppe  
 139 bison (or American bison ancestry). Dates are given as indication based on archaeological occupation  
 140 determined for each site, or, in the absence of such dating, based on stylistic comparison with other  
 141 depictions:

142 1. Grotte Chauvet-Pont d'Arc (Ardèche, France). Blurred black charcoal drawing. Aurignacian period  
 143 (~35,100 ± 175 calBP. (from C. Fritz and G. Tosello)

144 2. Grotte de Lascaux (Dordogne, France). Carving. Solutrean (~22,200 ± 380 calBP) or early  
 145 Magdalenian period (between ~19,300 ± 561 and ~20,597 ± 375 calBP). (adapted from A. Glory<sup>3</sup>)

- 146 3. Grotte de Lascaux (Dordogne, France). Carving. Solutrean ( $\sim 22,200 \pm 380$  calBP) or early  
147 Magdalenian period (between  $\sim 19,300 \pm 561$  and  $\sim 20,597 \pm 375$  calBP). (adapted from A. Glory<sup>3</sup>)
- 148 4. Grotte de Lascaux (Dordogne, France). Carving. Solutrean ( $\sim 22,200 \pm 380$  calBP) or early  
149 Magdalenian period (between  $\sim 19,300 \pm 561$  and  $\sim 20,597 \pm 375$  calBP). (adapted from A. Glory<sup>3</sup>)
- 150 5. Grotte du Gabillou (Dordogne, France). Carving. Early Magdalenian period ( $\sim 20,597 \pm 375$  calBP).  
151 (adapted from J. Gaussen)
- 152 6. Grotte des Trois Frères (Ariège, France). Carving. Gravettian period (dating estimated based on  
153 stylistic analysis). (adapted from H. Breuil<sup>4</sup>)
- 154 7. Grotte du Pech Merle (Lot, France). Painting (manganese). Gravettian period ( $\sim 29,447 \pm 443$  calBP).  
155 (adapted from M. Lorblanchet<sup>5</sup>)
- 156 8. Grotte du Pech Merle (Lot, France). Painting (manganese). Gravettian period ( $\sim 29,447 \pm 443$  calBP).  
157 (adapted from M. Lorblanchet<sup>5</sup>)
- 158 9. Grotte de La Pasiega (Cantabria, Spain). Black and red painting. Gravettian or Solutrean period  
159 (dating estimated based on stylistic analysis). (adapted from H. Breuil<sup>4</sup>)
- 160 10. Abri du Roc de Sers (Charente, France). Carving on limestone. Solutrean period ( $< 20,442 \pm 409$   
161 calBP). (adapted from L. Henri-Martin)
- 162

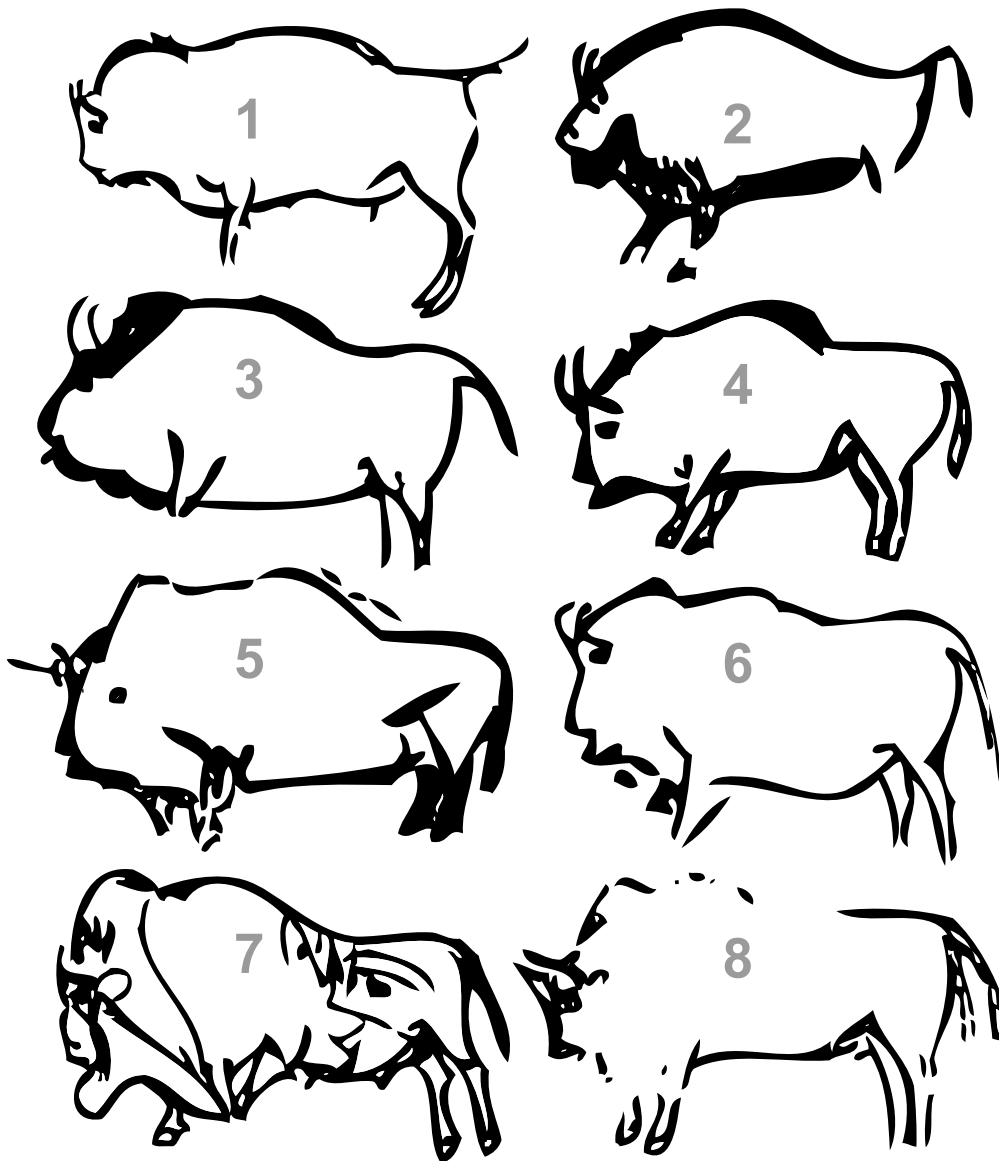

163

164 **Supplementary Fig 25. Wisent-like morphologies.** In European Palaeolithic art, some bison  
 165 depictions show morphological traits and anatomical details compatible with identification of wisent  
 166 ancestry. Dates are given as indication based on archaeological occupation determined for each site, or,  
 167 in the absence of such dating, based on stylistic comparison with other depictions:

168 1. Grotte de Pergouset (Ardèche, France). Carving. Magdalenian period (dating estimated based on  
 169 stylistic analysis). (adapted from M. Lorblanchet<sup>5</sup>)

170 2. Grotte du Portel (Ariège, France). Painting. Magdalenian period ( $\sim 14,250 \pm 295$  calBP). (adapted  
 171 from H. Breuil<sup>4</sup>)

172 3. Grotte de Niaux (Ariège, France). Painting. Magdalenian period ( $\sim 17,000 \pm 260$  calBP). (adapted  
 173 from H. Breuil<sup>4</sup>)

174 4. Grotte de Niaux (Ariège, France). Painting. Magdalenian period ( $\sim 17,000 \pm 260$  calBP). (adapted  
 175 from H. Breuil<sup>4</sup>)

176 5. Grotte de Fontanet (Ariège, France). Carving. Magdalenian period (between  $\sim 14250 \pm 295$  calBP  
 177 and  $\sim 16,600 \pm 1000$  calBP). (adapted from A. Glory<sup>5</sup>)

178 6. Grotte de Rouffignac (Dordogne, France). Painting. Magdalenian period (dating estimated based on  
 179 stylistic analysis). (adapted from C. Barrière<sup>6</sup>)



- 180 7. Grotte des Combarelles (Dordogne, France). Carving. Magdalenian period (between ~17,000 and  
181 ~14,300 calBP). (adapted from H. Breuil<sup>4</sup>)  
182 8. Grotte de Marsoulas (Haute-Garonne, France). Carving. Magdalenian period (dating estimated based  
183 on stylistic analysis). (from C. Fritz et G. Tosello)

184  
185

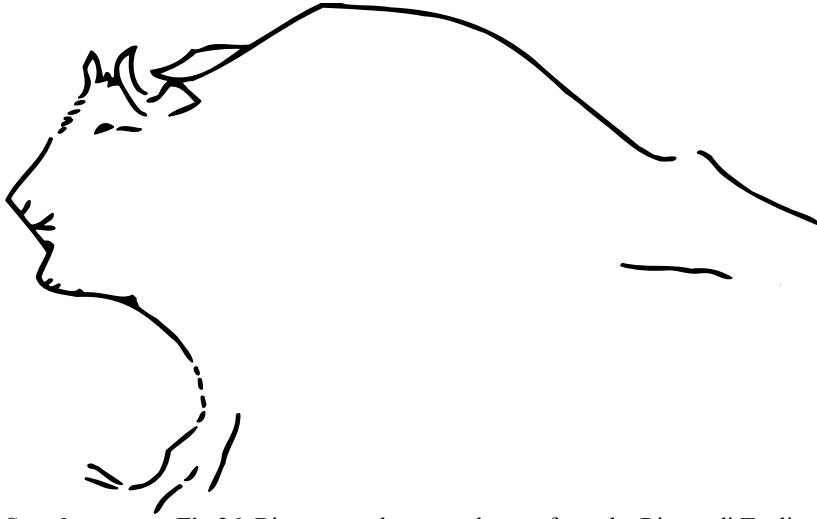

186  
187

**Supplementary Fig 26.** Bison carved on round stone from the Riparo di Tagliente site in Italy

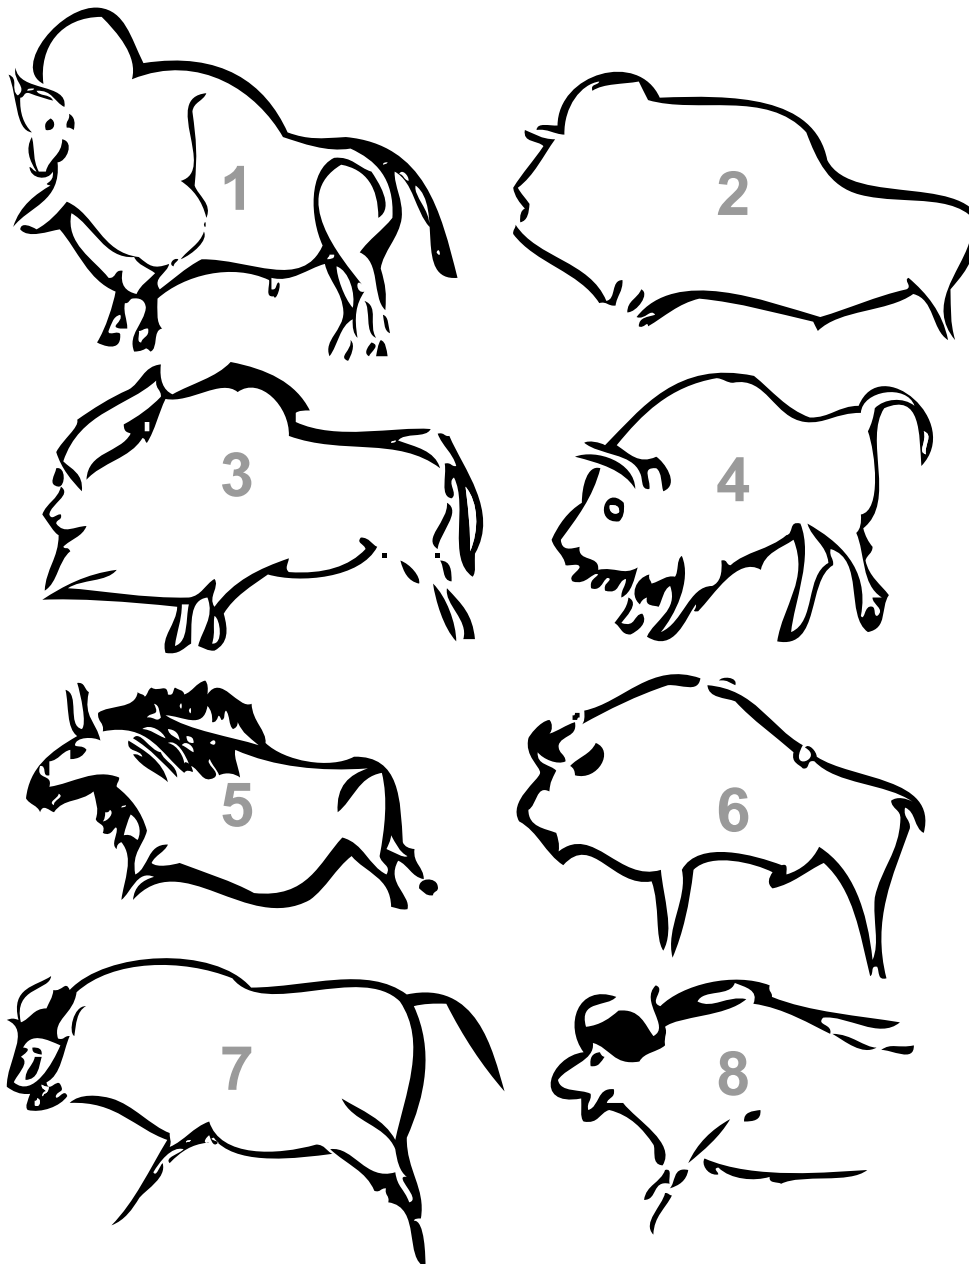

188  
 189 **Supplementary Fig 27. Undetermined morphologies.** In European Palaeolithic art, some bison  
 190 depictions show morphological traits and anatomical details that could be compatible with either bison  
 191 form. These pictures illustrate the limits of cave art analyses for morphological assessment of bison  
 192 forms, due to varying graphical conventions between cultures. Dates are given as indication based on  
 193 archaeological occupation determined for each site, or, in the absence of such dating, based on stylistic  
 194 comparison with other depictions:

195 1 Grotte de Font-de-Gaume (Dordogne, France). Black and red painting, and carving. Magdalenian  
 196 period (dating estimated based on stylistic analysis). (adapted from H. Breuil<sup>4</sup>)

197 2 Grotte de Niaux (Ariège, France). Painting. Magdalenian period (~17,000 ± 260 calBP). (adapted  
 198 from H. Breuil<sup>4</sup>)

199 3 Grotte des Trois Frères (Ariège, France). Carving. Magdalenian period (dating estimated based on  
 200 stylistic analysis). (adapted from H. Breuil<sup>4</sup>)

201 4 Grotte des Trois Frères (Ariège, France). Carving. Magdalenian period (dating estimated based on  
 202 stylistic analysis). (adapted from H. Breuil<sup>4</sup>)

- 203 5 Grotte des Trois Frères (Ariège, France). Carving. Gravettian period (dating estimated based on  
204 stylistic analysis). (adapted from H. Breuil<sup>4</sup>)
- 205 6 Grotte de La Grèze (Dordogne, France). Carving. Gravettian period (dating estimated based on  
206 stylistic analysis) (adapted from N. Aujoulat)
- 207 7 Grotte Chauvet-Pont d'Arc (Ardèche, France). Blured black charcoal drawing. Aurignacian period  
208 (~35100 ± 175 calBP). (from C. Fritz-G. Tosello)
- 209 8 Grotte Chauvet-Pont d'Arc (Ardèche, France). Blured black charcoal drawing. Aurignacian period  
210 (~35100 ± 175 calBP). (from C. Fritz-G. Tosello)
- 211
- 212

213  
214  
215  
216

## Supplementary Tables

Supplementary Table 1. Primers and adapters used in this study

|        | Primer                           | Primer Sequence (5' - 3')                                | Length<br>(a) |
|--------|----------------------------------|----------------------------------------------------------|---------------|
| Set_A1 | BovCR-16351F                     | CAACCCCAAAGCTGAAG                                        | ~96bp         |
|        | BovCR-16457R                     | TGGTTRGGGTACAAAGTCTGTG                                   |               |
| Set_B1 | BovCR-16420F                     | CCATAAATGCAAAGAGCCTCAYCAG                                | ~172bp        |
|        | BovCR-16642R                     | TGCATGGGGCATATAATTTAATGTA                                |               |
| Set_A2 | BovCR-16507F                     | AATGCATTACCCAAACRGGG                                     | ~184bp        |
|        | BovCR-16755R                     | ATTAAGCTCGTGATCTARTGG                                    |               |
| Set_B2 | BovCR-16633F <sup>(b)</sup>      | GCCCCATGCATATAAGCAAG                                     | ~132bp        |
|        | BovCR-16810R <sup>(b)</sup>      | GCCTAGCGGGTTGCTGGTTTCACGC                                |               |
| Set_A3 | BovCR-16765F <sup>(b)</sup>      | GAGCTTAAYTACCATGCCG                                      | ~125bp        |
|        | BovCR-16998R                     | CGAGATGTCTTATTTAAGAGGAAAGAATGG                           |               |
| Set_B3 | BovCR-16960F                     | CATCTGGTCTTTCTTCAGGGCC                                   | ~110bp        |
|        | BovCR-80R <sup>(b)</sup>         | CAAGCATCCCCAAAATAAA                                      |               |
| Frag1  | BovCR_16738M F <sup>(c,d)</sup>  | <b>CACGACGTTGTA AAAACGAC</b> ATYGTACATAGYACATTATGTCAA    | ~67bp         |
|        | BovCR_16810T R <sup>(c,d)</sup>  | <b>TACGACTACTATAGGGCGAGCCTAGCGGGTTGCTGGTTTCACGC</b>      |               |
| Frag2  | Mamm_12SE <sup>(d)</sup>         | CTATAATCGATAAAACCCCGATA                                  | ~96bp         |
|        | Mamm_12SH <sup>(d)</sup>         | GCTACACCTTGACCTAAC                                       |               |
|        | GAII_Indexing_x                  | CAAGCAGAAGACGGCATAACGAGATNNNNNNNGAGTGACTGGA GTTCAGACGTGT | n/a           |
|        | IS4_indPCR.P5 <sup>(e)</sup>     | AATGATACGGCGACCACCGAGATCTACACTCTTCCCTACACGACGCTCTT       | n/a           |
|        | IS7_short_amp.P5 <sup>(e)</sup>  | ACACTCTTTCCTACACGAC                                      | n/a           |
|        | IS8_short_amp.P7 <sup>(e)</sup>  | GTGACTGGAGTTCAGACGTGT                                    | n/a           |
|        | P5_short_RNAblock                | ACACUCUUUCCCUACACGAC                                     | n/a           |
|        | P7_short_RNAblock                | GUGACUGGAGUUCAGACGUGU                                    | n/a           |
|        | Bison_mt1_forward <sup>(f)</sup> | ACCGCGGCATACGATTAAC                                      |               |
|        | Bison_mt1_reverse <sup>(f)</sup> | AATTGCGAAGTGGATTTGG                                      |               |
|        | Bison_mt2_forward <sup>(f)</sup> | ATGAGCCAAAATCCACTTCG                                     |               |
|        | Bison_mt2_reverse <sup>(f)</sup> | TGTATTTGCGTCTGCTCGTC                                     |               |
|        | Bison_mt3_forward <sup>(f)</sup> | CGAATCCACAGCCGA ACTAT                                    |               |
|        | Bison_mt3_reverse <sup>(f)</sup> | TATAAAGCACCGCCAAGTCC                                     |               |

217  
218  
219  
220  
221  
222  
223  
224  
225

(a): Primers are excluded from the length of PCR amplicon.

(b):<sup>2</sup>.

(c): M13 (CAC GAC GTT GTA AAA CGA C) and T7 (TAC GAC TCA CTA TAG GGC GA) sequences were used as tags for primers BovCR\_16738F and BovCR\_16810R, respectively. This was done to obtain good quality Sanger sequences from short amplicons.

(d): One-step simplex PCRs.

(e): (Meyer and Kircher, "Illumina Sequencing Library Preparation for Highly Multiplexed Target Capture and Sequencing.")

(f): Primer pairs for use to generate DNA baits for mitochondrial DNA capture.

**Supplementary Table 2.** Summary of nuclear alleles detected at bovine SNP loci: NGS results and locus counts for ancient samples; locus counts for modern samples

| Sample ID     | Method                | Mapping results for the 9908 SNP positions |          |             |               |                |               | Number of SNP called out of the 9908 targeted for each ancient individuals |                    |         |         |             |                    |         |         |
|---------------|-----------------------|--------------------------------------------|----------|-------------|---------------|----------------|---------------|----------------------------------------------------------------------------|--------------------|---------|---------|-------------|--------------------|---------|---------|
|               |                       | Retained_reads                             | hits_raw | hits_unique | hits_raw_frac | hits_clonality | Mean coverage | Total                                                                      | Coverage depth >=1 |         |         | Total       | Coverage depth >=2 |         |         |
|               |                       |                                            |          |             |               |                |               |                                                                            | REF/REF            | REF/ALT | ALT/ALT |             | REF/REF            | REF/ALT | ALT/ALT |
| A15526        |                       | 7045                                       | 1821     | 99          | 0.26          | 0.95           | 0.01          | <b>49</b>                                                                  | 49                 | 0       | 0       | <b>1</b>    | 1                  | 0       | 0       |
| A017          |                       | 1280556                                    | 3893     | 1289        | 0.00          | 0.67           | 0.13          | <b>630</b>                                                                 | 591                | 0       | 39      | <b>88</b>   | 49                 | 0       | 39      |
| A018          |                       | 967346                                     | 3116     | 538         | 0.00          | 0.83           | 0.05          | <b>253</b>                                                                 | 241                | 0       | 12      | <b>28</b>   | 16                 | 0       | 12      |
| A001          |                       | 656008                                     | 392937   | 3486        | 0.60          | 0.99           | 0.35          | <b>1484</b>                                                                | 1268               | 2       | 214     | <b>523</b>  | 307                | 2       | 214     |
| A003          |                       | 1706985                                    | 12957    | 3423        | 0.01          | 0.74           | 0.35          | <b>1569</b>                                                                | 1363               | 5       | 201     | <b>470</b>  | 264                | 5       | 201     |
| A004          | 10k capture           | 240370                                     | 132883   | 645         | 0.55          | 1.00           | 0.07          | <b>315</b>                                                                 | 287                | 0       | 28      | <b>64</b>   | 36                 | 0       | 28      |
| A005          |                       | 1736500                                    | 25788    | 3519        | 0.01          | 0.86           | 0.35          | <b>1643</b>                                                                | 1438               | 7       | 198     | <b>464</b>  | 259                | 7       | 198     |
| A006          |                       | 10413909                                   | 99392    | 22312       | 0.01          | 0.78           | 2.25          | <b>5690</b>                                                                | 3468               | 104     | 2118    | <b>4755</b> | 2533               | 104     | 2118    |
| A007          |                       | 3583539                                    | 23832    | 2841        | 0.01          | 0.88           | 0.29          | <b>1307</b>                                                                | 1084               | 1       | 222     | <b>509</b>  | 286                | 1       | 222     |
| A15654        |                       | 1700840                                    | 1227601  | 220913      | 0.72          | 0.82           | 22.28         | <b>8738</b>                                                                | 4532               | 230     | 3976    | <b>8488</b> | 4282               | 230     | 3976    |
| A4093         |                       | 9400283                                    | 62631    | 4478        | 0.01          | 0.93           | 0.45          | <b>1946</b>                                                                | 1480               | 2       | 464     | <b>1031</b> | 565                | 2       | 464     |
| A3133         | Shotgun / 10k         | 299829433                                  | 9812523  | 465082      | 0.03          | 0.95           | 46.87         | <b>8898</b>                                                                | 4579               | 321     | 3998    | <b>8680</b> | 4361               | 321     | 3998    |
| A875          | and 40k capture       | 3908972                                    | 291640   | 234493      | 0.07          | 0.20           | 23.65         | <b>8433</b>                                                                | 4341               | 342     | 3750    | <b>8144</b> | 4052               | 342     | 3750    |
| CPC98_Aurochs | From published genome |                                            |          |             |               |                |               | <b>8882</b>                                                                | 4770               | 1808    | 2304    | <b>8810</b> | 4698               | 1808    | 2304    |

**Supplementary Table 3.** Summary statistics for NGS of whole mitochondrial genomes

| Sample ID | Retained_reads | hits_raw | hits_unique | hits_raw_frac | hits_clonality | AVG_Depth | STD_Depth | AVE_Length | STD_Length | 5pC>T | 3pG>A | Library repair |
|-----------|----------------|----------|-------------|---------------|----------------|-----------|-----------|------------|------------|-------|-------|----------------|
| A001      | 4822143        | 1618364  | 86944       | 0.34          | 0.95           | 432.09    | 224.83    | 80.82      | 37.60      | 0.03  | 0.02  |                |
| A004      | 5150804        | 2314449  | 220697      | 0.45          | 0.90           | 1152.17   | 541.88    | 84.88      | 36.11      | 0.02  | 0.02  |                |
| A018      | 3790161        | 1021750  | 24699       | 0.27          | 0.98           | 130.53    | 60.04     | 85.32      | 34.05      | 0.03  | 0.03  | USER           |
| A4089     | 8618722        | 5380606  | 44044       | 0.62          | 0.99           | 237.83    | 155.46    | 87.18      | 33.56      | 0.02  | 0.02  |                |
| A3133     | 66864927       | 1958     | 1949        | 0.00          | 0.00           | 11.41     | 6.77      | 93.92      | 29.66      | 0.00  | 0.01  |                |
| A003      | 985033         | 371605   | 64372       | 0.38          | 0.83           | 334.44    | 112.68    | 84.31      | 34.07      | 0.08  | 0.07  |                |
| A005      | 521428         | 262622   | 39121       | 0.50          | 0.85           | 196.95    | 65.76     | 81.59      | 30.96      | 0.05  | 0.09  |                |
| A006      | 456078         | 120668   | 44541       | 0.26          | 0.63           | 208.39    | 93.86     | 75.86      | 25.87      | 0.13  | 0.17  |                |
| A007      | 431113         | 175432   | 43269       | 0.41          | 0.75           | 192.35    | 85.93     | 71.74      | 24.13      | 0.11  | 0.08  |                |
| A4093     | 212315         | 106221   | 16923       | 0.50          | 0.84           | 73.23     | 31.26     | 70.48      | 24.60      | 0.07  | 0.09  | Partial UDG    |
| A15637    | 469884         | 4401     | 2621        | 0.01          | 0.40           | 8.85      | 7.22      | 50.41      | 12.17      | 0.41  | 0.35  |                |
| A15654    | 294965         | 29628    | 28329       | 0.10          | 0.04           | 170.48    | 89.68     | 98.23      | 34.91      | 0.05  | 0.02  |                |
| A15668    | 230709         | 3603     | 2842        | 0.02          | 0.21           | 11.07     | 7.80      | 59.61      | 15.06      | 0.07  | 0.06  |                |
| LE237     | 507023         | 4271     | 2677        | 0.01          | 0.37           | 9.84      | 5.70      | 58.98      | 23.99      | 0.55  | 0.51  |                |
| LE242     | 6912671        | 48793    | 35418       | 0.01          | 0.27           | 120.46    | 67.86     | 55.09      | 18.68      | 0.61  | 0.60  | None           |
| LE257     | 4156307        | 184236   | 28788       | 0.04          | 0.84           | 94.38     | 38.34     | 53.17      | 20.00      | 0.52  | 0.50  |                |

229  
230  
231

**Supplementary Table 4.** List of published mitochondrial control region sequences used for phylogenetic analysis. The Urals steppe bison are highlighted in red.

|                                     |                                     |                                            |                                               |
|-------------------------------------|-------------------------------------|--------------------------------------------|-----------------------------------------------|
| <b>American bison</b>               | Bison_priscus BS146_NS_11810_50     | Bison_priscus BS397_NS_32370_470           | Bos_indicus AY378135_0_0                      |
| Bison_bison AF083357_H1_0_0         | Bison_priscus BS147_NS_28120_290    | Bison_priscus BS398_NS_27400_260           | Bos_indicus DQ887765_0_0                      |
| Bison_bison AF083358_H2_0_0         | Bison_priscus BS148_NS_6400_50      | Bison_priscus BS400_NS_46100_2600          | Bos_indicus EF417971_0_0                      |
| Bison_bison AF083359_H3_0_0         | Bison_priscus BS149_NS_46100_2200   | Bison_priscus BS405_SI_23040_120           | Bos_indicus EF417974_0_0                      |
| Bison_bison AF083360_H4_0_0         | Bison_priscus BS150_NS_10510_50     | Bison_priscus BS407_NWT_55500_3100         | Bos_indicus EF417976_0_0                      |
| Bison_bison AF083361_H5_0_0         | Bison_priscus BS151_NS_21530_130    | Bison_priscus BS412_Y_30500_250            | Bos_indicus EF417977_0_0                      |
| Bison_bison AF083362_H6_0_0         | Bison_priscus BS161_NS_21040_120    | Bison_priscus BS414_BIR_4495_60            | Bos_indicus EF417979_0_0                      |
| Bison_bison AF083363_H7_0_0         | Bison_priscus BS163_LC_13240_75     | Bison_priscus BS415_D_30810_975            | Bos_indicus EF417981_0_0                      |
| Bison_bison AF083364_H8_0_0         | Bison_priscus BS164_LC_19540_120    | Bison_priscus BS418_China_26560_670        | Bos_indicus EF417983_0_0                      |
| Bison_bison BS100_29_5              | Bison_priscus BS165_LC_26460_160    | Bison_priscus BS438_AB_53800_2200          | Bos_indicus EF417985_0_0                      |
| Bison_bison BS102_22_5              | Bison_priscus BS170_YT_13040_70     | Bison_priscus BS440_AB_60400_2900          | Bos_indicus EF524120_0_0                      |
| Bison_bison BS129_0_2000            | Bison_priscus BS172_LC_12525_70     | Bison_priscus BS443_AB_34050_450           | Bos_indicus EF524125_0_0                      |
| Bison_bison BS162_AK_170_30         | Bison_priscus BS176_LC_12380_60     | Bison_priscus BS459_China_47700_1000       | Bos_indicus EF524126_0_0                      |
| Bison_bison BS173_NTC_3220_45       | Bison_priscus BS178_LC_17960_90     | Bison_priscus BS469_AB_305_24              | Bos_indicus EF524128_0_0                      |
| Bison_bison BS175_ICE_186_30        | Bison_priscus BS192_F_26300_300     | Bison_priscus BS472_F_13235_65             | Bos_indicus EF524130_0_0                      |
| Bison_bison BS177_NTC_3155_36       | Bison_priscus BS193_NS_49600_4000   | Bison_priscus BS473_AB_56300_3100          | Bos_indicus EF524132_0_0                      |
| Bison_bison BS200_AB_145_37         | Bison_priscus BS195_NS_29040_340    | Bison_priscus BS477_D_33710_240            | Bos_indicus EF524135_0_0                      |
| Bison_bison BS342_CHL_10340_40      | Bison_priscus BS196_NS_19420_100    | Bison_priscus BS478_D_34470_200            | Bos_indicus EF524141_0_0                      |
| Bison_bison BS348_CHL_10505_45      | Bison_priscus BS198_Y_2460_40       | Bison_priscus BS490_BIR_2415_25            | Bos_indicus EF524152_0_0                      |
| Bison_bison BS368_0_2000            | Bison_priscus BS201_Y_12960_60      | Bison_priscus BS493_NS_50000_4200          | Bos_indicus EF524156_0_0                      |
| Bison_bison BS417_AB_909_29         | Bison_priscus BS202_AB_10460_65     | Bison_priscus BS494_NS_44800_2200          | Bos_indicus EF524160_0_0                      |
| Bison_bison BS419_AB_7475_45        | Bison_priscus BS206_Sibb_23780_140  | Bison_priscus BS495_NS_29570_340           | Bos_indicus EF524166_0_0                      |
| Bison_bison BS421_AB_8145_45        | Bison_priscus BS211_Sibb_43800_1100 | Bison_priscus BS497_NS_30000_540           | Bos_indicus EF524167_0_0                      |
| Bison_bison BS422_AB_908_31         | Bison_priscus BS216_NS_47000_2900   | Bison_priscus BS498_NS_25980_230           | Bos_indicus EF524170_0_0                      |
| Bison_bison BS423_AB_4660_38        | Bison_priscus BS218_SI_14605_75     | Bison_priscus BS499_NS_31410_420           | Bos_indicus EF524172_0_0                      |
| Bison_bison BS424_AB_202_32         | Bison_priscus BS222_NWT_6110_45     | Bison_priscus BS500_NS_35580_550           | Bos_indicus EF524180_0_0                      |
| Bison_bison BS426_AB_7060_45        | Bison_priscus BS223_SI_53300_1900   | Bison_priscus BS517_BIR_2526_26            | Bos_indicus EF524183_0_0                      |
| Bison_bison BS428_AB_7105_45        | Bison_priscus BS224_AK_13125_75     | Bison_priscus BS564_SI_24570_90            | Bos_indicus EF524185_0_0                      |
| Bison_bison BS429_AB_6775_40        | Bison_priscus BS233_SW_16685_80     | Bison_priscus BS571_Sldy_32910_170         | Bos_indicus L27732_0_0                        |
| Bison_bison BS430_9270_50           | Bison_priscus BS235_BIR_43400_900   | <b>Bison_priscus BS592_Urals_42500_450</b> | Bos_indicus L27736_0_0                        |
| Bison_bison BS432_AB_7310_45        | Bison_priscus BS236_SW_19420_100    | Bison_priscus BS605_NTC_20380_90           | <b>Aurochs</b>                                |
| Bison_bison BS433_AB_10450_55       | Bison_priscus BS237_AB_11240_70     | <b>Bison_priscus BS660_Urals_29500_140</b> | Bos_primigenius DQ915522_ALL1_12030_52        |
| Bison_bison BS434_AB_809_32         | Bison_priscus BS243_SW_37550_400    | Bison_priscus BS662_SI_20000_0             | Bos_primigenius DQ915523_CAT1_5650_0          |
| Bison_bison BS439_AB_5845_45        | Bison_priscus BS244_LC_26210_170    | <b>Bison_priscus BS674_Urals_29060_140</b> | Bos_primigenius DQ915524_CHWF_3905_185        |
| Bison_bison BS441_AB_1273_32        | Bison_priscus BS248_OCr_12350_70    | <b>Bison_priscus BS708_Urals_47050_750</b> | Bos_primigenius DQ915537_CPC98_5936_34        |
| Bison_bison BS444_AB_636_29         | Bison_priscus BS249_F_39200_550     | <b>Bison_priscus BS713_Urals_30970_180</b> | Bos_primigenius DQ915542_EIL06_5830_29        |
| Bison_bison BS445_AB_378_30         | Bison_priscus BS253_LC_12665_65     | Bison_priscus BS719_LC_12465_75            | Bos_primigenius DQ915543_EIL14_5830_29        |
| Bison_bison BS449_6195_45           | Bison_priscus BS254_CHL_10230_55    | <b>European bison</b>                      | Bos_primigenius DQ915554_LJU3_8020_50         |
| Bison_bison BS454_AB_287_29         | Bison_priscus BS258_F_22120_130     | Bison_bonanus AF083356_0_0                 | Bos_primigenius DQ915558_NORF_3370_30         |
| Bison_bison BS456_AB_125_30         | Bison_priscus BS260_D_30750_290     | Bison_bonanus AY428860_0_0                 | <b>Bos_primigenius EF187280_PVL04_3204_56</b> |
| Bison_bison BS460_AB_10425_50       | Bison_priscus BS261_LC_12915_70     | Bison_bonanus EF693811_0_0                 | <b>Cattle</b>                                 |
| Bison_bison BS464_AB_5205_45        | Bison_priscus BS262_D_29150_500     | Bison_bonanus EU272053_0_0                 | Bos_taurus DQ124372_T4_0_0                    |
| Bison_bison BS465_AB_7115_50        | Bison_priscus BS281_BIR_40800_600   | Bison_bonanus EU272054_0_0                 | Bos_taurus DQ124375_T4_0_0                    |
| Bison_bison BS466_AB_3298_37        | Bison_priscus BS282_SI_56700_3200   | Bison_bonanus EU272055_0_0                 | Bos_taurus DQ124381_T3_0_0                    |
| Bison_bison BS503_BIR_2776_36       | Bison_priscus BS284_Y_13135_65      | Bison_bonanus U12953_0_0                   | Bos_taurus DQ124383_T2_0_0                    |
| Bison_bison BS560_AB_2807_28        | Bison_priscus BS286_Sim_49500_1300  | Bison_bonanus U12954_0_0                   | Bos_taurus DQ124388_T3_0_0                    |
| Bison_bison BS569_AB_3600_70        | Bison_priscus BS287_BIR_49100_1700  | Bison_bonanus U34294_0_0                   | Bos_taurus DQ124394_T3_0_0                    |
| Bison_bison BS570_AB_11300_290      | Bison_priscus BS289_BIR_2172_37     | <b>Yak</b>                                 | Bos_taurus DQ124398_T3_0_0                    |
| Bison_bison BS599_26_5              | Bison_priscus BS291_NS_49700_1400   | Bos_grunniens AY521140_0_0                 | Bos_taurus DQ124400_T4_0_0                    |
| Bison_bison U12935_0_0              | Bison_priscus BS292_NS_35710_730    | Bos_grunniens AY521149_0_0                 | Bos_taurus DQ124401_T4_0_0                    |
| Bison_bison U12936_0_0              | Bison_priscus BS294_BIR_58200_3900  | Bos_grunniens AY521150_0_0                 | Bos_taurus DQ124412_T4_0_0                    |
| Bison_bison U12941_0_0              | Bison_priscus BS311_BIR_12425_45    | Bos_grunniens AY521151_0_0                 | Bos_taurus EU177822_T3_0_0                    |
| Bison_bison U12943_0_0              | Bison_priscus BS316_SI_57700_3000   | Bos_grunniens AY521152_0_0                 | Bos_taurus EU177841_T1_0_0                    |
| Bison_bison U12944_0_0              | Bison_priscus BS318_NS_12410_50     | Bos_grunniens AY521154_0_0                 | Bos_taurus EU177842_T1_0_0                    |
| Bison_bison U12945_0_0              | Bison_priscus BS320_SI_49600_1500   | Bos_grunniens AY521155_0_0                 | Bos_taurus EU177845_T1_0_0                    |
| Bison_bison U12946_0_0              | Bison_priscus BS322_AK_9506_38      | Bos_grunniens AY521156_0_0                 | Bos_taurus EU177847_T1_0_0                    |
| Bison_bison U12947_0_0              | Bison_priscus BS323_SI_37810_380    | Bos_grunniens AY521160_0_0                 | Bos_taurus EU177848_T1_0_0                    |
| Bison_bison U12948_0_0              | Bison_priscus BS327_D_31530_230     | Bos_grunniens AY521161_0_0                 | Bos_taurus EU177853_T2_0_0                    |
| Bison_bison U12955_0_0              | Bison_priscus BS328_Sldy_31690_180  | Bos_grunniens DQ007210_0_0                 | Bos_taurus EU177854_T2_0_0                    |
| Bison_bison U12956_0_0              | Bison_priscus BS329_D_27060_190     | Bos_grunniens DQ007221_0_0                 | Bos_taurus EU177860_T2_0_0                    |
| Bison_bison U12957_0_0              | Bison_priscus BS337_CHL_10378_36    | Bos_grunniens DQ007222_0_0                 | Bos_taurus EU177861_T2_0_0                    |
| Bison_bison U12958_0_0              | Bison_priscus BS340_NS_24500_180    | Bos_grunniens DQ856594_0_0                 | Bos_taurus EU177862_T5_0_0                    |
| Bison_bison U12959_0_0              | Bison_priscus BS345_NS_39800_1200   | Bos_grunniens DQ856599_0_0                 | Bos_taurus EU177863_T5_0_0                    |
| <b>Steppe bison</b>                 | Bison_priscus BS350_NS_38700_1000   | Bos_grunniens DQ856600_0_0                 | Bos_taurus EU177864_T5_0_0                    |
| Bison_priscus A3133_Yukon_26360_220 | Bison_priscus BS351_BIR_57700_3200  | Bos_grunniens DQ856603_0_0                 | Bos_taurus EU177865_T5_0_0                    |
| Bison_priscus BS105_F_23380_460     | Bison_priscus BS359_NTC_20020_150   | Bos_grunniens DQ856604_0_0                 | <b>Buffalo</b>                                |
| Bison_priscus BS107_F_19570_290     | Bison_priscus BS364_NS_38800_1100   | Bos_grunniens EF494177_0_0                 | Bubalus_bubalis AF197208_0_0                  |
| Bison_priscus BS108_F_21020_360     | Bison_priscus BS365_NS_47000_2900   | Bos_grunniens EF494178_0_0                 | Bubalus_bubalis AF475212_0_0                  |
| Bison_priscus BS109_F_20730_350     | Bison_priscus BS387_NS_33320_540    | <b>Zebu</b>                                | Bubalus_bubalis AF475256_0_0                  |
| Bison_priscus BS111_F_21580_370     | Bison_priscus BS388_NS_27590_280    | Bos_indicus AB085923_0_0                   | Bubalus_bubalis AF475259_0_0                  |
| Bison_priscus BS121_F_19360_280     | Bison_priscus BS389_NS_17160_80     | Bos_indicus AB268563_0_0                   | Bubalus_bubalis AF475278_0_0                  |
| Bison_priscus BS123_BIR_1730_60     | Bison_priscus BS390_NS_31630_440    | Bos_indicus AB268564_0_0                   | Bubalus_bubalis AY488491_0_0                  |
| Bison_priscus BS124_BIR_11900_70    | Bison_priscus BS392_NS_36320_780    | Bos_indicus AB268566_0_0                   | Bubalus_bubalis EF536327_0_0                  |
| Bison_priscus BS125_F_27440_790     | Bison_priscus BS393_NS_39850_1200   | Bos_indicus AB268571_0_0                   | Bubalus_bubalis EF536328_0_0                  |
| Bison_priscus BS126_F_19150_280     | Bison_priscus BS394_NS_37460_890    | Bos_indicus AB268574_0_0                   | Bubalus_bubalis EU268899_0_0                  |
| Bison_priscus BS130_BIR_9000_250    | Bison_priscus BS395_NS_40700_1300   | Bos_indicus AB268578_0_0                   | Bubalus_bubalis EU268909_0_0                  |
| Bison_priscus BS133_F_33800_1900    | Bison_priscus BS396_NS_23680_170    | Bos_indicus AB268580_0_0                   |                                               |
| Bison_priscus BS145_NS_12270_50     |                                     | Bos_indicus AY378134_0_0                   |                                               |

232  
233  
234

235  
236

**Supplementary Table 5.** List of published whole mitochondrial genome sequences used for phylogenetic analysis.

| American bison                                       | Cattle                             | Yak                                                |
|------------------------------------------------------|------------------------------------|----------------------------------------------------|
| GU947000_Bison_bison_Plains_Nebraska_0               | FJ971080_Bos_Q_Italy_Romagnola_0   | KJ704989_Bos_grunniens_ChinaGansu_Gannan_0         |
| GU946976_Bison_bison_Plains_Montana_0                | FJ971085_Bos_R_Italy_Cinisara_0    | KR011113_Bos_grunniens_ChinaTibet_QinghaiPlateau_0 |
| GU947004_Bison_bison_Plains_Wyoming_0                | EU177841_Bos_T1_Italy_chianina_0   | KR052524_Bos_grunniens_ChinaTibet_Pali_0           |
| GU947006_Bison_bison_Wood_ElksIsland_0               | DQ124383_Bos_T2_Korea_0            | KJ463418_Bos_grunniens_ChinaQinghai_Dantong_0      |
| GU946987_Bison_bison_Plains_Montana_0                | EU177815_Bos_T3_Italy_piemontese_0 | KM233417_Bos_mutus_ChinaTibet_Yakow_0              |
| GU947005_Bison_bison_Wood_ElksIsland_0               | DQ124372_Bos_T4_Korea_0            | <b>Buffalo</b>                                     |
| GU947002_Bison_bison_Plains_Texas_0                  | EU177862_Bos_T5_Italy_valdostana_0 | GU947003_Bison_bison_Plains_Texas_0                |
| GU947003_Bison_bison_Plains_Texas_0                  | <b>Aurochs</b>                     | AY488491_Bubalus_bubalis                           |
| <b>Wisent</b>                                        | GU985279_Bos_P_England_6760        | AY702618_Bubalus_bubalis                           |
| JN632602_Bison_bonassus_0                            | JQ437479_Bos_P_Poland_1500         | AF547270_Bubalus_bubalis                           |
| HQ223450_Bison_bonassus_0                            | <b>Zebu</b>                        |                                                    |
| HM045017_Bison_bonassus_Poland_0                     | FJ971088_Bos_I1_Mongolia_0         |                                                    |
| <b>Steppe bison</b>                                  | EU177870_Bos_I2_Iran_0             |                                                    |
| KM593920_Bison_priscus_SGE2_France_TroisFreres_19151 |                                    |                                                    |

237  
238  
239  
240  
241

**Supplementary Table 6.** f4 ratio estimates, f4(A,O,X,C) is the numerator, f4(A,O,B,C) is the denominator.

**S6-A. Including heterozygotes**

| A             | O          | X                | C       | : | A             | O          | B       | C       | alpha    | std.err  | Z      |
|---------------|------------|------------------|---------|---|---------------|------------|---------|---------|----------|----------|--------|
| AmericanBison | Ovis_aries | AllWisent+CladeX | Aurochs | : | AmericanBison | Ovis_aries | Steppe  | Aurochs | 0.890988 | 0.025788 | 34.551 |
| AmericanBison | Ovis_aries | AllWisent+CladeX | Steppe  | : | AmericanBison | Ovis_aries | Aurochs | Steppe  | 0.109012 | 0.025788 | 4.227  |
| AmericanBison | Ovis_aries | AllWisent        | Aurochs | : | AmericanBison | Ovis_aries | Steppe  | Aurochs | 0.884257 | 0.02918  | 30.304 |
| AmericanBison | Ovis_aries | AllWisent        | Steppe  | : | AmericanBison | Ovis_aries | Aurochs | Steppe  | 0.115743 | 0.02918  | 3.967  |
| AmericanBison | Ovis_aries | CladeX           | Aurochs | : | AmericanBison | Ovis_aries | Steppe  | Aurochs | 0.893978 | 0.022763 | 39.273 |
| AmericanBison | Ovis_aries | CladeX           | Steppe  | : | AmericanBison | Ovis_aries | Aurochs | Steppe  | 0.106022 | 0.022763 | 4.658  |
| AmericanBison | Ovis_aries | AncientWisent    | Aurochs | : | AmericanBison | Ovis_aries | Steppe  | Aurochs | 0.812638 | 0.054701 | 14.856 |
| AmericanBison | Ovis_aries | AncientWisent    | Steppe  | : | AmericanBison | Ovis_aries | Aurochs | Steppe  | 0.187362 | 0.054701 | 3.425  |
| AmericanBison | Ovis_aries | HistoricalWisent | Aurochs | : | AmericanBison | Ovis_aries | Steppe  | Aurochs | 0.773802 | 0.032319 | 23.943 |
| AmericanBison | Ovis_aries | HistoricalWisent | Steppe  | : | AmericanBison | Ovis_aries | Aurochs | Steppe  | 0.226198 | 0.032319 | 6.999  |
| AmericanBison | Ovis_aries | ModernWisent     | Aurochs | : | AmericanBison | Ovis_aries | Steppe  | Aurochs | 0.899149 | 0.031184 | 28.834 |
| AmericanBison | Ovis_aries | ModernWisent     | Steppe  | : | AmericanBison | Ovis_aries | Aurochs | Steppe  | 0.100851 | 0.031184 | 3.234  |

242  
243  
244

**S6-B. Haploidisation by randomly sampling an allele at heterozygous sites**

| A             | O          | X                | C       | : | A             | O          | B       | C       | alpha    | std.err  | Z      |
|---------------|------------|------------------|---------|---|---------------|------------|---------|---------|----------|----------|--------|
| AmericanBison | Ovis_aries | AllWisent+CladeX | Aurochs | : | AmericanBison | Ovis_aries | Steppe  | Aurochs | 0.894329 | 0.027147 | 32.944 |
| AmericanBison | Ovis_aries | AllWisent+CladeX | Steppe  | : | AmericanBison | Ovis_aries | Aurochs | Steppe  | 0.105671 | 0.027147 | 3.893  |
| AmericanBison | Ovis_aries | AllWisent        | Aurochs | : | AmericanBison | Ovis_aries | Steppe  | Aurochs | 0.88342  | 0.030518 | 28.947 |
| AmericanBison | Ovis_aries | AllWisent        | Steppe  | : | AmericanBison | Ovis_aries | Aurochs | Steppe  | 0.11658  | 0.030518 | 3.82   |
| AmericanBison | Ovis_aries | CladeX           | Aurochs | : | AmericanBison | Ovis_aries | Steppe  | Aurochs | 0.912424 | 0.025204 | 36.202 |
| AmericanBison | Ovis_aries | CladeX           | Steppe  | : | AmericanBison | Ovis_aries | Aurochs | Steppe  | 0.087576 | 0.025204 | 3.475  |
| AmericanBison | Ovis_aries | AncientWisent    | Aurochs | : | AmericanBison | Ovis_aries | Steppe  | Aurochs | 0.813521 | 0.059078 | 13.77  |
| AmericanBison | Ovis_aries | AncientWisent    | Steppe  | : | AmericanBison | Ovis_aries | Aurochs | Steppe  | 0.186479 | 0.059078 | 3.156  |
| AmericanBison | Ovis_aries | HistoricalWisent | Aurochs | : | AmericanBison | Ovis_aries | Steppe  | Aurochs | 0.786183 | 0.035363 | 22.232 |
| AmericanBison | Ovis_aries | HistoricalWisent | Steppe  | : | AmericanBison | Ovis_aries | Aurochs | Steppe  | 0.213817 | 0.035363 | 6.046  |
| AmericanBison | Ovis_aries | ModernWisent     | Aurochs | : | AmericanBison | Ovis_aries | Steppe  | Aurochs | 0.899281 | 0.032252 | 27.883 |
| AmericanBison | Ovis_aries | ModernWisent     | Steppe  | : | AmericanBison | Ovis_aries | Aurochs | Steppe  | 0.100719 | 0.032252 | 3.123  |

245  
246  
247  
248  
249  
250  
251

**Supplementary Table 7:** Bootstrap resampling of genotypes for testing topologies using D statistics. The table shows the fraction of bootstrap replicates for which the original result was not recapitulated, from 10000 bootstraps, for 10%, 20%, etc. subsets of the genotypes. A topology is considered to be simple if it either has a non-significant D statistic (see Supplementary Figure 11), or has a D statistic closest to zero with confidence intervals that do not overlap the D statistic for the other two topologies.

| Most parsimonious topology                 | Simple topology | 10%    | 20%    | 30%    | 40%    | 50%    | 60%    | 70%    | 80%    | 90% |
|--------------------------------------------|-----------------|--------|--------|--------|--------|--------|--------|--------|--------|-----|
| ((CladeX, Steppe), ModernWisent)           | True            | 0.0067 | 0.0001 | 0.0    | 0.0    | 0.0    | 0.0    | 0.0    | 0.0    | 0.0 |
| ((Steppe, HistoricalWisent), ModernWisent) | False           | 0.0575 | 0.0573 | 0.0284 | 0.0036 | 0.0005 | 0.0    | 0.0    | 0.0    | 0.0 |
| ((ModernWisent, CladeX), HistoricalWisent) | False           | 0.1753 | 0.371  | 0.485  | 0.4427 | 0.3039 | 0.1564 | 0.0549 | 0.0072 | 0.0 |



|                                                   |       |        |        |        |        |        |        |        |        |     |
|---------------------------------------------------|-------|--------|--------|--------|--------|--------|--------|--------|--------|-----|
| ((CladeX, Steppe), HistoricalWisent)              | True  | 0.0182 | 0.0174 | 0.0154 | 0.016  | 0.0113 | 0.0072 | 0.0022 | 0.0004 | 0.0 |
| ((AncientWisent, HistoricalWisent), ModernWisent) | True  | 0.0565 | 0.0152 | 0.0042 | 0.0012 | 0.0    | 0.0    | 0.0    | 0.0    | 0.0 |
| ((Steppe, HistoricalWisent), AncientWisent)       | False | 0.0151 | 0.0039 | 0.0001 | 0.0002 | 0.0    | 0.0    | 0.0    | 0.0    | 0.0 |
| ((AncientWisent, Steppe), ModernWisent)           | True  | 0.0484 | 0.0086 | 0.0014 | 0.0002 | 0.0    | 0.0    | 0.0    | 0.0    | 0.0 |
| ((CladeX, Steppe), AncientWisent)                 | False | 0.0304 | 0.0142 | 0.0086 | 0.0063 | 0.0033 | 0.0025 | 0.0015 | 0.0001 | 0.0 |
| ((AncientWisent, CladeX), ModernWisent)           | True  | 0.0703 | 0.0213 | 0.0062 | 0.0015 | 0.0007 | 0.0    | 0.0    | 0.0    | 0.0 |
| ((HistoricalWisent, CladeX), AncientWisent)       | False | 0.0184 | 0.0053 | 0.001  | 0.0005 | 0.0    | 0.0    | 0.0    | 0.0    | 0.0 |
| ((ModernWisent, HistoricalWisent), Aurochs)       | False | 0.0591 | 0.0031 | 0.0005 | 0.0    | 0.0    | 0.0    | 0.0    | 0.0    | 0.0 |
| ((Aurochs, ModernWisent), CladeX)                 | False | 0.2229 | 0.2476 | 0.0824 | 0.0115 | 0.0009 | 0.0    | 0.0    | 0.0    | 0.0 |
| ((HistoricalWisent, CladeX), Aurochs)             | True  | 0.0061 | 0.0    | 0.0    | 0.0    | 0.0    | 0.0    | 0.0    | 0.0    | 0.0 |
| ((Steppe, CladeX), Aurochs)                       | True  | 0.0001 | 0.0    | 0.0    | 0.0    | 0.0    | 0.0    | 0.0    | 0.0    | 0.0 |
| ((Steppe, HistoricalWisent), Aurochs)             | True  | 0.0    | 0.0    | 0.0    | 0.0    | 0.0    | 0.0    | 0.0    | 0.0    | 0.0 |
| ((Steppe, ModernWisent), Aurochs)                 | False | 0.1362 | 0.0535 | 0.0048 | 0.0007 | 0.0002 | 0.0    | 0.0001 | 0.0    | 0.0 |
| ((Steppe, AncientWisent), Aurochs)                | True  | 0.0441 | 0.0082 | 0.0001 | 0.0001 | 0.0    | 0.0    | 0.0    | 0.0    | 0.0 |
| ((AncientWisent, CladeX), Aurochs)                | True  | 0.0276 | 0.0058 | 0.0004 | 0.0001 | 0.0    | 0.0    | 0.0    | 0.0    | 0.0 |

253  
254  
255

**Supplementary Table 8:** Hypergeometric test for shared derived steppe alleles. Steppe derived sites were filtered for coverage depth in the wisent lineages 1 and 2, for which the test was performed. In the last row, wisent represents all wisent other than CladeX.

| 1                 | 2                 | Steppe | Derived 1 | Derived 2 | Common | P        |
|-------------------|-------------------|--------|-----------|-----------|--------|----------|
| Ancient Wisent    | CladeX            | 161    | 111       | 133       | 108    | 1.72E-12 |
| Ancient Wisent    | Historical Wisent | 174    | 115       | 119       | 108    | 1.37E-24 |
| Ancient Wisent    | Modern Wisent     | 178    | 124       | 108       | 95     | 5.12E-11 |
| CladeX            | Historical Wisent | 529    | 448       | 385       | 370    | 3.09E-29 |
| CladeX            | Modern Wisent     | 556    | 469       | 350       | 326    | 2.79E-13 |
| Historical Wisent | Modern Wisent     | 618    | 436       | 372       | 342    | 5.50E-48 |
| Wisent            | CladeX            | 557    | 357       | 468       | 332    | 4.18E-14 |

256

257  
258  
259

**Supplementary Table 9:** Hypergeometric test for shared derived aurochs alleles. Aurochs derived sites were filtered for coverage depth in the wisent lineages 1 and 2, for which the test was performed. In the last row, wisent represents all wisent other than CladeX.

| 1                 | 2                 | Aurochs | Derived 1 | Derived 2 | Common | P        |
|-------------------|-------------------|---------|-----------|-----------|--------|----------|
| Ancient Wisent    | CladeX            | 758     | 20        | 9         | 4      | 4.11E-05 |
| Ancient Wisent    | Historical Wisent | 822     | 22        | 11        | 8      | 1.01E-11 |
| Ancient Wisent    | Modern Wisent     | 826     | 25        | 22        | 12     | 1.49E-14 |
| CladeX            | Historical Wisent | 2517    | 36        | 47        | 16     | 7.34E-20 |
| CladeX            | Modern Wisent     | 2580    | 39        | 73        | 15     | 1.99E-14 |
| Historical Wisent | Modern Wisent     | 2845    | 58        | 83        | 39     | 2.66E-50 |
| Wisent            | CladeX            | 2634    | 93        | 41        | 15     | 1.58E-12 |

260

261  
262  
263

**Supplementary Table 10:** The weighted sample median  $\hat{M}$ , the weighted sample mode  $\hat{M}_o$ , and the prediction error  $E_{pred}$ , for each ABC analysis.

| Trio                              | $\hat{M}$ | $\hat{M}_o$ | $E_{pred}$ |
|-----------------------------------|-----------|-------------|------------|
| A875, 6A, Aurochs                 | 0.8660    | 0.9204      | 0.4534     |
| A3133, 6A, Aurochs                | 0.8480    | 0.9172      | 0.4881     |
| A875, Historical Wisent, Aurochs  | 0.8636    | 0.9323      | 0.4187     |
| A3133, Historical Wisent, Aurochs | 0.8646    | 0.9384      | 0.4921     |
| All                               | 0.8250    | 0.9034      | 0.5111     |

264  
265  
266

**Supplementary Table 11:** Empirical posterior probabilities for levels of hybridisation 1%-5%, for each trio.

| Trio                              | 1%     | 2%     | 3%     | 4%     | 5%     |
|-----------------------------------|--------|--------|--------|--------|--------|
| A875, 6A, Aurochs                 | 0.9620 | 0.9340 | 0.8720 | 0.8400 | 0.8120 |
| A3133, 6A, Aurochs                | 0.9600 | 0.9600 | 0.8840 | 0.8440 | 0.7980 |
| A875, Historical Wisent, Aurochs  | 0.9660 | 0.9340 | 0.8860 | 0.8520 | 0.7940 |
| A3133, Historical Wisent, Aurochs | 0.9580 | 0.9100 | 0.8580 | 0.8080 | 0.7640 |
| All                               | 0.9720 | 0.9440 | 0.9140 | 0.8760 | 0.8760 |

267  
268

269 **Supplementary Note 1:**

270 **Samples, DNA extraction and sequencing**

271

272 **Samples and radiocarbon dating**

273 For clarity purposes we kept the most commonly used taxonomic nomenclature of  
274 bovine throughout the study. Although not yet widely accepted, it has been proposed  
275 to sink the genus *Bison* into *Bos* based on the shallow time depth of their evolutionary  
276 history <sup>7</sup>. The validity of such genetic separation is further tested in this study.

277 Samples from a total of 87 putative bison bones were collected from 3 regions across  
278 Europe: Urals, Caucasus, and Western Europe (Supplementary Data 1). As shown in  
279 the Supplementary Data 1, most of the samples were from bones identified as bison or  
280 bovid post-cranial samples, because cranial material is rare for this time period.

281 The main set of samples, from northeastern Europe, represents isolated bones  
282 excavated from a wide variety of cave deposits throughout the Ural Mountains and  
283 surrounding areas. These samples are housed at the Zoological Museum of the  
284 Institute of Plant and Animal Ecology (ZMIPAE) in Ekaterinburg, Russia.

285 In southeastern Europe, bovid bone fragments were excavated in Mezmaiskaya Cave  
286 in the Caucasus Mountains. Samples were obtained from the Laboratory of Prehistory  
287 in St Petersburg. Additional six samples from the Caucasus are identified as  
288 Caucasian bison (*B. bonasus caucasicus*, hereafter referred to as historical wisent):  
289 two of them are from the National History Museum (NHM) in London, and four come  
290 from hunts in the Kuban Oblast in the early 20th century (one collected by scientist  
291 Viktor Iwanovich Worobjew in 1906 and three hunted during the Kuban Hunt under  
292 the Grand Duke Sergei Mikhailovich of Russia), currently held at the Zoological  
293 Institute of the Russian Academy of Sciences (ZIRAS - Saint Petersburg, Russia).  
294 Four additional bones from the Caucasus region comes from the eastern border with  
295 Ukraine and are held at the Institute of Archeology (IAKiev), Ukrainian Academy of  
296 Sciences, Kiev.

297 Most western European bones come from late Pleistocene deposits on the North Sea  
298 bed. These specimens, now curated by the North Sea Network (NSN) in the  
299 Netherlands, were recovered by trawling operations and as such have little  
300 stratigraphic information. Specimens were selected on the basis of their  
301 morphological similarities with the ‘small form’ described by Drees and Post <sup>8</sup>.

302 Three bones held in the collections of the Vienna Natural History Museum (VNHM),  
303 and three bones held in the Museum National d’Histoire Naturelle (Paris) come from  
304 central European Holocene sites.

305 Finally, one bone comes from the Monti Lessini rock-shelter site Riparo Tagliente in  
306 the North of Italy, one bone comes from the Swiss site of Le Gouffre de la combe de  
307 la racine in the Jura mountains (Swiss Institute for Speleology and Karst Studies,  
308 ISSKA), and one bone comes from l’Aven de l’Arquet in the Gard region of France  
309 (Musée de Préhistoire d’Orgnac).

310 In addition, two samples from the Beringian region were used: one sample, a steppe  
311 bison astragalus from the Yukon territory (Canada), has previously been used in a  
312 study of cytosine methylation in ancient DNA <sup>9</sup>; and another steppe bison from  
313 Alyoshkina Zaimka in Siberia.

314

315 All non-contemporaneous samples from which bison mitochondrial control region  
316 sequences were successfully amplified were sent for accelerator mass spectrometry  
317 (AMS) radiocarbon dating (except for seven samples from level 3 of the  
318 Mezmaiskaya cave, which were expected to be older than AMS dating capabilities  
319 <sup>10,11</sup>). The dating was performed by the AMS facility at the Oxford Radiocarbon  
320 Accelerator Unit at the University of Oxford (OxA numbers), the Eidgenössische  
321 Technische Hochschule in Zürich for a Ukrainian sample (ETH number), and the  
322 Ångström Laboratory of the University of Uppsala, Sweden, for the Swiss sample (Ua  
323 number). The results are shown in Supplementary Data 1, with all dates reported in  
324 kcal yr BP unless otherwise stated. The calibration of radiocarbon dates was  
325 performed using OxCal v4.1 with the IntCal13 curve <sup>12</sup>.  
326 In addition, two bones identified as bison were previously dated at the Centre for  
327 Isotope Research, Radiocarbon Laboratory, University of Groningen, Netherlands,  
328 with infinite radiocarbon age, consistently with the dating performed at Oxford  
329 (A2808-JGAC26=GrA-34533; A2809-JGAC27= GrA-34524).

330

### 331 **Ancient DNA extraction**

332 All ancient DNA work was conducted in clean-room facilities at the University of  
333 Adelaide's Australian Centre for Ancient DNA, Australia (ACAD), and at the  
334 University of Tuebingen, Germany (UT) following published guidelines <sup>13</sup>.

#### 335 University of Adelaide:

336 Samples were UV irradiated (260 nm) on all surfaces for 30 min. Sample surface was  
337 wiped with 3% bleach, then ~1 mm was removed using a Dremel tool and  
338 carborundum cutting disks. Each sample was ground to a fine powder using a Mikro-  
339 Dismembrator (Sartorius). Two DNA extraction methods were used during the course  
340 of the project (see Supplementary Data 1 for the method used for specific samples):

341 - *Phenol-chloroform method*: Ancient DNA was extracted from 0.2-0.5g powdered  
342 bone using phenol-chloroform and centrifugal filtration methods according to a  
343 previously published method <sup>2</sup>.

344 - *In solution silica based method*: Ancient DNA was extracted from 0.2-0.3g  
345 powdered bone according to a previously published method <sup>14</sup>.

#### 346 University of Tuebingen:

347 Samples were UV-irradiated overnight to remove surface contamination. DNA  
348 extraction was performed following a guanidinium-silica based extraction method <sup>15</sup>  
349 using 50mg of bone powder. A DNA library was prepared using 20µl of extract for  
350 each sample according to <sup>16</sup>. Sample-specific indexes were added to both library  
351 adapters to differentiate between individual samples after pooling and multiplex  
352 sequencing <sup>17</sup>. Indexed libraries were amplified in 100µl reactions, followed by  
353 purification over Qiagen MinElute spin columns (Quiagen, Hilden, Germany).  
354

355 **Sequencing of the mitochondrial control region**

356 A ~600 bp fragment of the mitochondrial control region was amplified in one or up to  
357 four overlapping fragments, depending on DNA preservation. PCR amplifications  
358 were performed using primers designed for the bovid mitochondrial control region,  
359 following the method described in <sup>2</sup>.

360 One-step simplex PCR amplifications using Platinum *Taq* Hi-Fidelity polymerase  
361 were performed on a heated lid thermal cycler in a final volume of 25 µl containing 1  
362 µl of aDNA extract, 1mg/ml rabbit serum albumin fraction V (RSA; Sigma-Aldrich,  
363 Sydeny, NSW), 2 mM MgSO<sub>4</sub> (Thermo Fisher, Scoresby VIC), 0.6 µM of each  
364 primer (Supplementary Table 1), 250 µM of each dNTP (Thermo Fisher), 1.25 U  
365 Platinum *Taq* Hi-Fidelity and 1 × Hi-Fidelity PCR buffer (Thermo Fisher). The  
366 conditions for PCR amplification were initial denaturation at 95°C for 2 min,  
367 followed by 50 cycles of 94°C for 20 sec, 55°C for 20 sec and 68°C for 30 sec, and a  
368 final extension at 68°C for 10 min at the end of the 50 cycles.

369 Multiplex primer sets A and B were set up separately (Supplementary Table 1).  
370 Multiplex PCR was performed in a final volume of 25 µl containing 2 µl of aDNA  
371 extract, 1 mg/ml RSA, 6 mM MgSO<sub>4</sub>, 0.2 µM of each primer (Supplementary Table  
372 1), 500 µM of each dNTP, 2 U Platinum *Taq* Hi-Fidelity and 1 × Hi-Fidelity PCR  
373 buffer. Multiplex PCR conditions were initial denaturation at 95°C for 2 min,  
374 followed by 35 cycles of 94°C for 15 sec, 55°C for 20 sec and 68°C for 30 sec, and a  
375 final extension at 68°C for 10 min at the end of the 35 cycles. Multiplex PCR  
376 products were then diluted to 1:10 as template for the second step of simplex PCR.  
377 The simplex PCR, using Amplitaq Gold (Thermo Fisher) or Hotmaster™ *Taq* DNA  
378 polymerase (5Prime, Milton, Qld), was conducted in a final volume of 25 µl  
379 containing 1 µl of diluted multiplex PCR product, 2.5 mM MgCl<sub>2</sub>, 0.4 µM of each  
380 primer (Supplementary Table 1), 200 µM of each dNTP, 1 U Amplitaq  
381 Gold/Hotmaster *Taq* polymerase and 1 × PCR buffer. The PCR conditions were initial  
382 denaturation at 95°C for 2 min, followed by 35 cycles of 94°C for 20 sec, 55°C for 15  
383 sec and 72°C for 30 sec, and a final extension at 72°C for 10 min at the end of the 35  
384 cycles. Multiple PCR fragments were cloned to evaluate the extent of DNA damage  
385 and within-PCR template diversity.

386 PCR products were then checked by electrophoresis on 3.5-4.0% agarose TBE gels,  
387 and visualized after ethidium bromide staining on a UV transilluminator. PCR  
388 amplicons were purified using Agencourt® AMPure magnetic beads (Beckman  
389 Coulter, Lane Cove, NSW) according to the manufacturer's instructions. Negative  
390 extraction controls and non-template PCR controls were used in all experiments.

391 All purified PCR products were bi-directionally sequenced with the ABI Prism®  
392 BigDye™ Terminator Cycle Sequencing Kit version 3.1 (Thermo Fisher). The  
393 sequencing reactions were performed in a final volume of 10 µl containing 3.2 pmol  
394 of primer (Supplementary Table 1), 0.25 µl Bigdye terminator premixture, and 1.875  
395 µl of 5 × sequencing buffer. The reaction conditions included initial denaturation at  
396 95°C for 2 min, 25 cycles with 95°C for 10 sec, 55°C for 15 sec, and 60°C for 2 min  
397 30 sec. Sequencing products were purified using Agencourt® Cleanseq magnetic  
398 beads (Beckman Coulter) according to the manufacturer's protocol. All sequencing  
399 reactions were analysed on an ABI 3130 DNA capillary sequencer (Thermo Fisher).

400 Mitochondrial control region sequences (>400bp) were successfully amplified from  
401 65 out of 87 analysed samples. Three samples produced a mixture of cattle and bison

402 amplification products; these were identified as contaminated and removed from all  
403 analyses. Sequences from two individuals did not match bovid haplotypes and were  
404 identified as brown bear and elk in BLAST searches (see Supplementary Data 1). This  
405 is presumably due to the source postcranial elements being morphologically  
406 ambiguous and misidentified.

407

#### 408 **Sequencing of the whole mitochondrial genome**

409 To provide deeper phylogenetic resolution and further examine the apparent close  
410 relationship between *Bos* and wisent mitochondria, full mitogenome sequences of 13  
411 CladeX specimens, as well as one ancient wisent, one historical wisent, and one  
412 steppe bison were generated using hybridisation capture with RNA probes.

413

#### 414 *Samples A001, A004, A018, A4089 (CladeX)*

#### 415 *DNA library preparation*

416 DNA repair and polishing were performed in a reaction that contained 20 µl DNA  
417 extract, 1x NEB Buffer 2 (New England Biolabs, Ipswich, MA), 3U USER enzyme  
418 cocktail (New England Biolabs), 20U T4 polynucleotide kinase (New England  
419 Biolabs), 1mM ATP, 0.1 mM dNTPs (New England Biolabs), 8 µg RSA, and H<sub>2</sub>O to  
420 38.5 µl. The reaction was incubated at 37°C for 3 hours then 4.5U of T4 DNA  
421 polymerase (New England Biolabs) was added and the reaction incubated at 25°C for  
422 a further 30 min. Double-stranded libraries were then built with truncated Illumina  
423 adapters containing dual 5-mer internal barcodes as in <sup>16</sup>.

424

#### 425 *Amplification of Bos taurus mitochondrial in vitro transcription (IVT) templates*

426 RNA probes were generated from long-range PCR products of *Bos taurus*  
427 mitochondrial DNA. The NCBI Primer-Blast program  
428 (<http://www.ncbi.nlm.nih.gov/tools/primer-blast/>) was used to design primers to  
429 amplify the *Bos taurus* mitochondrial genome (NC\_006853.1) in three overlapping  
430 sections: mito-1 (6568 bp), mito-2 (6467 bp), and mito-3 (5390 bp). Primer pairs  
431 were designed with a high melting temperature to permit amplification with 2-stage  
432 PCR and the T7 RNA promoter was attached to the 5' end of one primer from each  
433 pair <sup>18</sup>(Supplementary Table 1). Amplification of each mitochondrial section was  
434 performed using a heated lid thermal cycler in multiple PCRs containing 1x Phire  
435 Buffer (Thermo Fisher), 25 ng calf thymus DNA (Affymetrix, Santa Clara, CA), 200  
436 µM dNTPs, 500 nM forward and reverse primers, 0.5 µl Phire Hot Start II DNA  
437 polymerase (Thermo Fisher), and H<sub>2</sub>O to 25 µl. The mito-1 and mito-2 sections were  
438 amplified with a thermal cycler program of 1 cycle: 98°C for 30 sec; 26 cycles: 98°C  
439 for 10 sec and 72°C for 70 sec; and 1 cycle: 72°C for 180 sec whilst the program for  
440 mito-3 was 1 cycle: 98°C for 30 sec, 28 cycles: 98°C for 10 sec and 72°C for 60 sec,  
441 and 1 cycle: 72°C for 180 sec. After amplification, 2 µl of each PCR was agarose gel  
442 electrophoresed and the product visualized with Gel-Red (Biotium, Hayward, CA)  
443 staining and UV illumination. Amplification of mito-1 and mito-2 produced a single  
444 band and the PCRs for these mitochondrial sections were separately pooled and then  
445 purified with QiaQuick columns (Qiagen, Chadstone Centre, VIC) following the  
446 provided PCR cleanup protocol. Amplification of mito-3 produced unwanted  
447 products and the correct size amplicon was size selected using gel excision followed



448 by purification with QiaQuick columns using the gel extraction protocol. Purified  
449 amplicons from each mitochondrial section were quantified using a NanoDrop 2000  
450 Spectrophotometer (Thermo Fisher).

451

#### 452 *Transcription of Bos taurus mitochondrial IVT templates*

453 Each of the three mitochondrial IVT templates were transcribed using a T7 High  
454 Yield RNA Synthesis Kit (New England Biolabs) in multiple reactions containing  
455 150-200 ng purified amplicon, 1x Reaction Buffer, 10 mM rNTPs, 2 µl T7 enzyme  
456 mix, and H<sub>2</sub>O to 20 µl. The IVT reactions were incubated for 16 hours at 37°C and  
457 then the DNA template was destroyed by incubating for an additional 15 min at 37°C  
458 with 2U Turbo Dnase (Thermo Fisher). IVT reactions for each mitochondrial section  
459 were separately pooled and purified with Megaclear spin columns (Thermo Fisher)  
460 except that H<sub>2</sub>O was used to elute the RNA instead of the provided elution buffer. The  
461 elution buffer provided with the Megaclear kit was found to inhibit fragmentation in  
462 the next step. Integrity of the RNA was verified on an acrylamide gel and the mass  
463 quantified with a Nanodrop 2000 Spectrophotometer.

464

#### 465 *Fragmentation of mitochondrial IVT RNA*

466 RNAs from the IVT transcription were fragmented with a NEBNext Magnesium  
467 RNA Fragmentation Module (New England Biolabs) in reactions that contained 1x  
468 Fragmentation buffer, 45 µg RNA, and H<sub>2</sub>O to 20 µl. Reactions were incubated at  
469 94°C for 10 min and fragmentation stopped with the addition of 2 µl Stop Buffer.  
470 After fragmentation, each reaction was purified with a RNeasy MinElute spin column  
471 (Qiagen) by following the provided cleanup protocol except for the final elution. To  
472 elute, 20 µL H<sub>2</sub>O was pipetted into the column and the column was heated at 65°C for  
473 5 min and then centrifuged at 15,000 g for 1 min. The flow-through was transferred  
474 to a 1.5 ml tube and stored at -80°C. The fragmented RNA was quantified on a  
475 NanoDrop 2000 Spectrophotometer and 100 ng was visualized on an acrylamide gel  
476 producing a smear in the range of 80-300 bases.

477

#### 478 *Biotinylation of fragmented RNA*

479 Biotinylation was performed in several reactions containing 6.7 µg each of mito-1,  
480 mito-2, and mito-3 fragmented RNA, 40 µl Photoprobe Long Arm (Vector  
481 Laboratories, Burlingame, CA), and H<sub>2</sub>O to 80 µl in 200 µl PCR tubes. The tubes  
482 were placed in a 4°C gel cooling rack and then incubated under the bulb of a UV  
483 sterilization cabinet for 30 min. Organic extractions were performed on the labelling  
484 reactions by adding 64 µl H<sub>2</sub>O, 16 µl 1 M Tris buffer, and 160 µl sec-butanol to each  
485 tube and shaking vigorously for 30 sec followed by centrifugation for 1 minute at  
486 1000 g. The upper organic layers were discarded and the extraction repeated with an  
487 additional 160 µl sec-butanol. After the second organic layers were discarded, the  
488 remaining aqueous phases were purified with RNeasy MinElute spin columns  
489 following the provided reaction cleanup protocol but with a modified elution  
490 procedure described in the previous step. Elutions with similar RNA were pooled and  
491 then quantified with a NanoDrop Spectrophotometer 2000 and the RNA, which will  
492 now be called probe, was stored at -80°C in 5 µl aliquots at 100 ng/µl.

493

494 *Repetitive sequence blocking RNA*

495 RNA to block repetitive sequences in bison aDNA was transcribed from Bovine  
496 HyBlock™ DNA (i.e. Cot-1 DNA, Applied Genetics Laboratories Inc., Melbourne,  
497 FL) using a published linear amplification protocol<sup>19</sup>. Briefly, the HyBlock DNA  
498 was polished in a reaction containing T4 polynucleotide kinase and T4 DNA  
499 polymerase and purified with MinElute spin columns following the PCR cleanup  
500 protocol provided. Tailing was performed on the polished DNA with terminal  
501 transferase and a tailing solution containing 92 μM dTTP (Thermo Fisher) and 8 μM  
502 ddCTP (Affymetrix). After tailing, the HyBlock DNA was purified with MinElute spin  
503 columns as before. The HyBlock DNA was then heat denatured and the T7-A18B  
504 primer (Supplementary Table 1), containing the T7 RNA polymerase promoter, was  
505 allowed to anneal to the poly-T tail with slow cooling. A second-strand synthesis  
506 reaction was then performed on the HyBlock DNA using DNA polymerase I Klenow  
507 fragment (New England Biolabs) and the product was purified with MinElute spin  
508 columns. The double stranded HyBlock DNA was transcribed using a T7 High Yield  
509 RNA Synthesis Kit in multiple reactions containing 75 ng DNA, 1x Reaction Buffer,  
510 10 mM rNTPs, 2 μl T7 enzyme mix, and H<sub>2</sub>O to 20 μl. IVT reactions were incubated  
511 for 16 hours at 37°C and then the DNA template was destroyed by adding 2U Turbo  
512 Dnase and incubating for an additional 15 min at 37°C. The RNA was purified with  
513 RNeasy MinElute spin columns as above. Purified RNA was quantified on a  
514 NanoDrop 2000 and 100 ng visualized on an acrylamide gel, which produced a smear  
515 80 to 500 bp in length.

516

517 *Primary mitochondrial hybridisation capture*

518 Truncated versions of the Illumina adapters were used for hybridisation capture  
519 because full-length adapters reduce enrichment efficiency<sup>20</sup>. For the primary  
520 hybridisation capture, three Reagent Tubes were prepared for each bison library with  
521 the following materials: Reagent Tube #1- 3.5 μl of 35-55 ng/μl DNA library;  
522 Reagent Tube #2- 5 μl probes, 1 μl HyBlock RNA, and 0.5 μl of 50 μM P5/P7 RNA  
523 blocking oligonucleotides (Supplementary Table 1); Reagent Tube #3- 30 μl  
524 Hybridisation Buffer<sup>21</sup>: 75% formamide (Thermo Fisher), 75 mM HEPES, pH 7.3, 3  
525 mM EDTA (Thermo Fisher), 0.3% SDS (Thermo Fisher), and 1.2 M NaCl (Thermo  
526 Fisher). Hybridisation capture was performed in a heated lid thermal cycler  
527 programmed as follows: Step 1- 94°C for 2 min, Step 2- 65°C for 3 min, Step 3- 42°C  
528 for 2 min, Hold 4- 42°C hold. To start hybridisation capture, Reagent Tubes were  
529 placed in the thermal cycler at the start of each program Step in the following order:  
530 Step 1- Reagent Tube #1; Step 2- Reagent Tube #2; Step 3- Reagent Tube #3. For  
531 each library, once the Hold cycle started 20 μl of hybridisation buffer from Reagent  
532 Tube #3 was mixed with the RNA in Reagent Tube #2. The entire content of Reagent  
533 Tube #2 was then pipetted into Reagent Tube #1 and mixed with the bison library to  
534 begin the hybridisation capture. Hybridisation capture was carried out at 42°C for 48  
535 hours.  
536 Magnetic streptavidin beads (New England Biolabs) were washed just prior to the end  
537 of the hybridisation capture incubation. For each library, 50 μl of beads were washed  
538 twice using 0.5 ml Wash Buffer 1(2X SSC+0.05% Tween-20, all reagents Thermo  
539 Fisher) and a magnetic rack. We also saturated all magnetic bead sites that could  
540 potentially bind nucleic acid in a non-specific fashion using yeast tRNA, to optimise  
541 the expected and specific streptavidin-biotin binding. Briefly, the beads were blocked

542 by incubation in 0.5 ml Wash Buffer 1+ 100 µg yeast tRNA (Thermo Fisher) for 30  
543 min on a rotor. Blocked beads were washed once as before and then suspended in 0.5  
544 ml Wash Buffer. At the end of the hybridisation capture, each reaction was added to a  
545 tube of blocked beads and incubated at room temperature for 30 min on a rotor. The  
546 beads were then taken through a series of stringency washes as follows: Wash 1 - 0.5  
547 ml Wash Buffer 1 at room temperature for 10 min; Wash 2 - 0.5 ml Wash Buffer 2  
548 (0.75X SSC + 0.05% Tween-20) at 50°C for 10 min; Wash 3 - 0.5 ml Wash Buffer 2  
549 at 50°C for 10 min; Wash 4 - 0.5 ml Wash Buffer 3 (0.2X SSC + 0.05% Tween-20) at  
550 50°C for 10 min. After the last wash, the captured libraries were released from the  
551 probe by suspending the beads in 50 µl of Release buffer (0.1 M NaOH, Sigma  
552 Aldrich) and incubating at room temperature for 10 min. The Release buffer was then  
553 neutralized with the addition of 70 µl Neutralization buffer (1 M Tris-HCl pH 7.5,  
554 Thermo Fisher). Captured libraries were then purified with MinElute columns by first  
555 adding 650 µl PB buffer and 10 µl 3 M sodium acetate to adjust the pH for efficient  
556 DNA binding. Libraries were purified using the provided PCR cleanup protocol and  
557 eluting with 35 µl EB+0.05% Tween-20.

558

#### 559 *Primary hybridisation capture amplification*

560 Amplification of each primary hybridisation capture was performed in five PCRs  
561 containing 5 µl of primary captured library, 1X Phusion HF buffer (Thermo Fisher),  
562 200 µM dNTPs, 200 µM each of primers IS7\_short\_amp.P5 and IS8\_short\_amp.P7  
563 (Supplementary Table 1), 0.25 U Phusion Hot Start II DNA polymerase (Thermo  
564 Fisher), and H<sub>2</sub>O to 25 µl. The five PCR products were pooled and DNA was purified  
565 using AMPure magnetic beads.

566

#### 567 *Secondary mitochondrial hybridisation capture*

568 Amplified primary libraries were taken through a second round of hybridisation  
569 capture using the same procedure as describe in *Primary mitochondrial hybridisation*  
570 *capture* step.

571

#### 572 *Secondary hybridisation capture amplification*

573 Indexed primers were used to convert the DNA from the secondary hybridisation  
574 capture to full length Illumina sequencing libraries. Each library was amplified in  
575 three PCRs containing 5 µl secondary hybridisation capture library, 1X Phusion HF  
576 buffer, 200 µM dNTPs, 200 µM each of primers GAII\_Indexing\_x (library specific  
577 index) and IS4 (Supplementary Table 1), 0.25 U Phusion Hot Start II DNA  
578 polymerase, and H<sub>2</sub>O to 25 µl. Amplification was performed in a heated lid thermal  
579 cycler programmed as follows 1 cycle: 98°C for 30 sec; 10 cycles: 98°C for 10 sec,  
580 60°C for 20 sec, 72°C for 20 sec; and 1 cycle: 72°C for 180 sec. The five PCR  
581 products were pooled and DNA was purified using AMPure magnetic beads.

582

583 Samples A003, A005, A006, A007, A017, A15526, A15637, A15668 (CladeX),  
584 A4093 (ancient wisent) and A15654 (historical wisent)

#### 585 *DNA library preparation*

586 Double-stranded Illumina libraries were built from 20 µl of each DNA extract using

587 partial UDG treatment<sup>22</sup> and truncated Illumina adapters with dual 7-mer internal  
588 barcodes, following the protocol from<sup>23</sup>.

589

#### 590 *Hybridisation capture*

591 Commercially synthesised biotinylated 80-mer RNA baits (MYcroarray, MI, USA)  
592 were used to enrich the target library for mitochondrial DNA. Baits were designed as  
593 part of the commercial service using published mitochondrial sequences from 24  
594 placental mammals, including *Bison bison* and *Bos taurus*.

595 One round of hybridisation capture was performed according to the manufacturer's  
596 protocol (MYbaits v2 manual) with modifications. We used P5/P7 RNA blocking  
597 oligonucleotides (Supplementary Table 1) instead of the blocking oligonucleotides  
598 provided with the kit. We also incubated the magnetic beads with yeast tRNA to  
599 saturate all potential non-specific sites on the magnetic beads that could bind nucleic  
600 acids and increase the recovery of non-specific DNA and therefore decrease the final  
601 DNA yield.

602 Indexed primers were used to convert the capture DNA to full length Illumina  
603 sequencing libraries. Each library was amplified in eight PCRs containing 5 µl  
604 hybridisation capture library, 1x Gold Buffer II, 2.5mM MgCl<sub>2</sub>, 200 µM dNTPs, 200  
605 µM each of primers GAII\_Indexing\_x (library specific index) and IS4  
606 (Supplementary Table 1), 1.25 U Amplitaq Gold DNA polymerase, and H<sub>2</sub>O to 25 µl.  
607 Amplification was performed in a heated lid thermal cycler programed as follows 1  
608 cycle: 94°C for 6 min; 15 cycles: 98°C for 30 sec, 60°C for 30 sec, 72°C for 40 sec;  
609 and 1 cycle: 72°C for 180 sec. The PCR products were pooled and DNA was purified  
610 using AMPure magnetic beads (Agencourt<sup>®</sup>, Beckman Coulter).

611

#### 612 *Samples LE237, LE242 and LE257 (CladeX)*

613 Target DNA enrichment was performed by capture of the pooled libraries using DNA  
614 baits generated from bison (*Bison bison*) mitochondrial DNA<sup>24</sup>. The baits were  
615 generated using three primer sets (Supplementary Table 1, f) designed with the  
616 Primer3Plus software package<sup>25</sup>. All extractions and pre-amplification steps of the  
617 library preparation were performed in clean room facilities and negative controls were  
618 included for each reaction.

619

#### 620 *Sample A3133 (steppe bison)*

621 DNA repair and polishing were performed in a reaction that contained 20 µl bison  
622 A3133 extract, 1x NEB Buffer 2, 3U USER enzyme cocktail, 20U T4 polynucleotide  
623 kinase, 1mM ATP, 0.1 mM dNTPs, 8 µg RSA, and H<sub>2</sub>O to 38.5 µl. The reaction was  
624 incubated at 37°C for 3 hours then 4.5U of T4 DNA polymerase was added and the  
625 reaction incubated at 25°C for a further 30 min. Double-stranded libraries were then  
626 built with truncated Illumina adapters containing dual 5-mer internal barcodes as in<sup>16</sup>  
627 with the final amplification with indexed primers using Phusion Hot Start II DNA  
628 polymerase to obtain full length Illumina sequencing libraries.

629

630 **Nuclear locus capture**

631 Genome-wide nuclear locus capture was attempted on DNA repaired libraries of 13  
632 bison samples (as described above - see Supplementary Table 2). Two  
633 different sets of probe were used (as described below), but ultimately, only the 9908  
634 loci common to both sets were used for comparative analysis (see nuclear locus  
635 analysis section).

636

637 Probe sets

638 *40k SNP probe set*

639 This probe set was originally designed to enrich 39,294 of the 54,609 BovineSNP50  
640 v2 BeadChip (Illumina) bovine single nucleotide polymorphism (SNP) loci used in a  
641 previous phylogenetic study<sup>26</sup>, allowing for a direct comparison of the newly  
642 generated data to published genotypes. The discrepancy in the number of surveyed  
643 targets was due to manufacturing constraints, as the flanking sequences surrounding  
644 certain bovine SNP were too degenerate for synthesis with the MyBaits technology.  
645 Probes (MYcroarray, Ann Arbor, MI) were 121-mer long, centred on the targeted  
646 bovine SNP and with no tiling, as per the original design of the BovineSNP50 v2  
647 BeadChip<sup>27</sup>.

648 The BovineSNP50 v2 BeadChip assay targets SNPs that are variable in *Bos taurus* in  
649 order to genotype members of cattle breeds. Consequently, SNPs are heavily  
650 ascertained to be common in cattle, and their use in phylogenetic studies of other  
651 bovid species results in levels of heterozygosity that decrease rapidly with increased  
652 genetic distance between cattle and the species of interest. Decker et al. (2009) found  
653 the average minor allele frequency in plains bison and wood bison for the 40,843  
654 bovine SNPs used in the phylogenetic analysis was 0.014 and 0.009, respectively.  
655 Average minor allele frequencies ranged from 0.139 to 0.229 in breeds of taurine  
656 cattle.

657

658 *10k SNP probe set*

659 A second set of probes was ordered from MyBaits that targeted a 9,908 locus subset  
660 of the previous 39,294 bovine SNPs selected for enrichment. This smaller subset was  
661 chosen to minimise ascertainment bias during phylogenetic and population analyses  
662 based on their polymorphism within the diversity of available modern genotypes of  
663 bison (American and European), Yak, Gaur and Banteng (total of 72 individuals). All  
664 of these taxa belong to a monophyletic clade, outside of the cattle diversity, and are  
665 consequently all equidistant from the cattle breeds that were used to ascertain the SNP  
666<sup>27</sup>, therefore reducing the impact of ascertainment bias when conducting comparisons  
667 within the clade. The exclusion of monomorphic sites across species allows focusing  
668 the capture on loci that are more likely to be phylogenetically informative within the  
669 bison diversity. Furthermore, singleton sites (only variable for one modern individual,  
670 and therefore not informative for the modern phylogeny) were retained on the  
671 principle that they might capture some of the unknown ancient diversity of bison  
672 when genotyping ancient individuals.

673 We designed 70-mer probes, and this short length, as well as the limited number of  
674 targets, allowed for a tiling of 4 different probes for each targeted locus, within the  
675 same MYcroarray custom kit of 40,000 unique probes. Among all potential 70-mer

676 sequences within the original 121-mer probe sequence set, only those containing the  
677 targeted bovine SNP no fewer than 10 nucleotides from either end were retained as  
678 potential probes. Four probes were then designed using the following criteria: i)  
679 Estimated melting temperature closest to the average from the 40k SNP probe set; ii)  
680 Optimum proportion of guanine based on the efficiency of the 40k SNP probe set; iii)  
681 No two probes can be closer than 7 nucleotides from one another; iv) All ‘GGGG’  
682 and ‘CTGGAG’ motifs were modified to ‘GTGT’ and ‘CTGTAG’, respectively. The  
683 former change was incorporated on the recommendation from MyBaits to avoid poly  
684 G stretches because their synthesis technology has difficulty with this type of motif  
685 and the latter variation was included to remove a restriction site that will be used in a  
686 future protocol to produce these probes from an immortalized DNA oligo library<sup>28</sup>.

687

#### 688 DNA library preparation

689 All DNA libraries were used for capture of both the mitochondrial genome and  
690 genome-wide nuclear loci. See Supplementary Information “Whole mitochondrial  
691 genome sequencing” for protocols.

692

#### 693 Hybridisation capture

694 One round of hybridisation capture was performed according to the manufacturer’s  
695 protocol (MYbaits v2 manual) with modifications. We used P5/P7 RNA blocking  
696 oligonucleotides (Supplementary Table 1) instead of the blocking oligonucleotides  
697 provided with the kit. We also incubated the magnetic beads with yeast tRNA (see  
698 above) to saturate all potential non-specific sites on the magnetic beads that could  
699 bind nucleic acids and increase the recovery of non-specific DNA.

700 Indexed primers were used to convert the capture DNA to full length Illumina  
701 sequencing libraries. Each library was amplified in eight PCR containing 5 µl  
702 hybridisation capture library, 1C Gold Buffer II, 2.5mM MgCl<sub>2</sub>, 200 µM dNTPs, 200  
703 µM each of primers GAII\_Indexing\_x (library specific index) and IS4  
704 (Supplementary Table 1), 1.25 U Amplitaq Gold DNA polymerase, and H<sub>2</sub>O to 25 µl.  
705 Amplification was performed in a heated lid thermal cycler programed as follows 1  
706 cycle: 94°C for 6 min; 15 cycles: 98°C for 30 sec, 60°C for 30 sec, 72°C for 40 sec;  
707 and 1 cycle: 72°C for 180 sec. The PCR products were pooled and DNA was purified  
708 using AMPure magnetic beads.

709

#### 710 **NGS and data processing**

##### 711 *Whole mitochondrial genomes*

712 All libraries enriched for the mitochondrial genome were sequenced in paired-end  
713 reactions on Illumina machines (HiSeq 2500 for LE237A, LE242B and LE247B –  
714 MiSeq for the rest), except for A017 and A15526 from which the final concentration  
715 of DNA obtained after capture was insufficient for sequencing. The mitochondrial  
716 genome of the steppe bison A3133 was recovered from shotgun sequencing on an  
717 Illumina HiSeq, performed in the context of another study (see Supplementary Table  
718 3).

719 All NGS reads were processed using the pipeline Paleomix v1.0.1<sup>29</sup>. AdapterRemoval  
720 v2<sup>30</sup> was used to trim adapter sequences, merge the paired reads, and eliminate all

721 reads shorter than 25 bp. BWA v0.6.2<sup>31</sup> was then used to map the processed reads to  
722 the reference mitochondrial genome of the wisent (NC\_014044) or the American  
723 bison (NC\_012346, only for the steppe bison A3133). Minimum mapping quality was  
724 set at 25, seeding was disabled and the maximum number or fraction of gap opens  
725 was set to 2.

726

727 MapDamage v2<sup>32</sup> was used to check that the expected contextual mapping and  
728 damage patterns were observed for each library, depending on the enzymatic  
729 treatment used during library preparation (see Supplementary Table 3 and Figures S1-  
730 3 for examples), and re-scale base qualities for the non-repaired libraries.

731 Finally nucleotides at the position of the bovine SNP were called using samtools and  
732 bcftools, setting the minimum base quality at 30 and the minimum depth of coverage  
733 at 2. Consensus sequences were then generated using the Paleomix script  
734 vcf\_to\_fasta.

735

### 736 *Nuclear*

737 Nuclear DNA from historical (historical wisent: A15654) and ancient (ancient wisent:  
738 A4093; CladeX: A15526, A001, A003, A004, A005, A006, A007, A017, A018;  
739 steppe: A3133, A875) samples, containing HiSeq data (A3133 and A875) and MiSeq  
740 data (all samples), was processed using Paleomix v1.0.1<sup>29</sup> to map reads against the  
741 *Bos taurus* reference UMD 3.1<sup>33</sup>. Paleomix was configured to use BWA v0.6.2<sup>31</sup> for  
742 mapping, with seeding disabled and -n 0.01 -o 2 (see Supplementary Table 2).  
743 MapDamage v2<sup>32</sup> was used to check that the expected contextual mapping and  
744 damage patterns were observed for each library, and empirically re-scale base  
745 qualities at the end of the fragments.

746 Variants were called using the consensus caller of samtools/bcftools v1.2<sup>34</sup> limiting  
747 calls to the 9908 capture sites. Variant calls with a QUAL value lower than 25 were  
748 removed. The genotypes for historical and ancient samples were merged with  
749 previously published extant bovid 40k capture data<sup>26</sup>, and *Bos primigenius* (aurochs)  
750 sample CPC98<sup>35</sup>. Only genotypes for the 9908 loci common among all data were  
751 retained.

752

753 **Supplementary Note 2:**

754 **DNA analyses**

755

756 **Phylogenetic analysis**

757 *Mitochondrial control region phylogeny*

758 The 60 newly sequenced bovid mitochondrial regions (Supplementary Data 1) were  
759 manually aligned, using SeaView v4.3.5<sup>36</sup>. These sequences were aligned with 302  
760 published sequences (Supplementary Table 4) representing the following bovid  
761 mitochondrial lineages: European bison or wisent (*Bison bonasus*), American bison  
762 (*Bison bison*), steppe bison (*Bison priscus*), zebu (*Bos indicus*), and cattle (*Bos*  
763 *taurus*). Among these published sequences, 5 were from steppe bison collected in the  
764 Urals (Shapiro et al. 2004, Supplementary Data 1).

765 The TN93+G6 model of nucleotide substitution was selected by comparison of  
766 Bayesian information criterion (BIC) scores in ModelGenerator v0.85<sup>37</sup>. A  
767 phylogenetic tree was then inferred using both maximum-likelihood and Bayesian  
768 methods (Figure 2A). Bayesian analyses were performed using the program MrBayes  
769 v3.2.3<sup>38</sup>. Posterior estimates of parameters were obtained by Markov chain Monte  
770 Carlo sampling with samples drawn every 1000 steps. We used 2 runs, each of four  
771 Markov chains, comprising one cold and three heated chains, each of 10 million steps.  
772 The first 50% of samples were discarded as burn-in before the majority-rule  
773 consensus tree was calculated. A maximum-likelihood analysis was performed with  
774 the program PhyML v3<sup>39</sup>, using both NNI and SPR rearrangements to search for the  
775 tree topology and using approximate likelihood-ratio tests to establish the statistical  
776 support of internal branches. Complete phylogenies inferred using both methods are  
777 shown in Supplementary Figure 4.

778 *Whole mitochondrial genome phylogeny*

779 The 16 newly sequenced bison whole mitochondrial genomes (Supplementary Data 1)  
780 were aligned with 31 published sequences (Supplementary Table 5) representing the  
781 following bovid mitochondrial lineages: 3 wisent (*Bison bonasus*), 8 American bison  
782 (*Bison bison*), 1 steppe bison (*Bison priscus*), 5 yaks (*Bos grunniens* – *Bos mutus*), 2  
783 zebus (*Bos indicus*), 7 cattle (*Bos taurus*), 2 aurochs (*Bos primigenius*), and 4  
784 buffalo (*Bubalus bubalis*).

785 We used the same methods as described above for the control region to align and  
786 estimate the phylogeny. The HKY+G6 model of nucleotide substitution was selected  
787 through comparison of BIC scores (Figures 2B and S5).

788 *Estimation of evolutionary timescale*

789 To estimate the evolutionary timescale, we used the program BEAST v1.8.1<sup>40</sup> to  
790 conduct a Bayesian phylogenetic analysis of all radiocarbon-dated samples from  
791 CladeX and wisent (Figure 1C). The GMRF skyride model<sup>41</sup> was used to account for  
792 the complex population history, and a strict clock was assumed. We found support for  
793 a strict molecular clock based on replicate analyses using a relaxed uncorrelated  
794 lognormal clock<sup>42</sup>, which could not reject the strict clock assumption.

795 Mean calibrated radiocarbon dates associated with the sequences were used as  
796 calibration points. Some samples appear to be older than 55 ky: one from the Urals,  
797 four from the North Sea and five from the Caucasus (Supplementary Data 1). Because



798 these dates have effectively infinite radiocarbon error margins, we allowed them to  
799 vary in the analysis by treating them as distinct parameters to be estimated in the  
800 model<sup>43</sup>. The dated samples from Mezmaiskaya Cave are from stratigraphic layers  
801 2B4 and 2B3, which lie atop of layer 3. All these lower Middle Palaeolithic layers at  
802 Mezmaiskaya have 14C results beyond the radiocarbon limit, reflected in the  
803 predominance of greater-than or near-background limit ages<sup>11</sup>, and therefore are  
804 consistent with the electron spin resonance (ESR) chronology for these levels<sup>10</sup>, which  
805 suggests mean ages in the range from 53 to 73 ky BP (including error margins).  
806 Consequently, for each Caucasian sample, we specified a lognormal prior age  
807 distribution (mean=8,000) with an offset of 50 ky and with 95% of the prior  
808 probability less than 80 ky. A similar prior distribution (mean=26,000) was used for  
809 the five remaining samples that had infinite radiocarbon dates, with a 95% prior  
810 probability less than 150 ky. Based on the results of all four phylogenetic analyses  
811 described above, which showed strong support for the reciprocal monophyly of  
812 CladeX and wisent when outgroups were included, this monophyly was constrained  
813 for the BEAST runs.

814 All parameters showed sufficient sampling (indicated by effective sample sizes above  
815 200) after 5,000,000 steps, with the first 10% of samples discarded as burn-in. In  
816 addition, a date-randomization test was conducted to check whether the temporal  
817 signal from the radiocarbon dates associated with the ancient sequences was sufficient  
818 to calibrate the analysis<sup>44</sup>. This test randomizes all dates and determines whether the  
819 95% high posterior density (HPD) intervals of the rates estimated from the date-  
820 randomized data sets include the mean rate estimated from the original data set  
821 (Supplementary Figure 6).

822  
823  
824 The time to the most recent common ancestor (tMRCA) between wisent and  
825 CladeX mitochondrial lineages was estimated at 121.6 kyr (92.1 – 152.3) (Figure 2C).  
826 The tMRCAs for the two lineages was inferred to be 69.3 kyr (53.4 – 89.4) for wisent  
827 and 114.9 kyr (89.2 – 143.1) for CladeX. Furthermore, there is some  
828 phylogeographical structure within CladeX, with all individuals from the North Sea  
829 forming a basal group, which existed before the population replacement with steppe  
830 bison, but complete mixture of genetic diversity between all locations after re-  
831 colonization. In addition, the tMRCA of the MIS 3 diversity of CladeX was estimated  
832 to be about 53.1 kyr (41.5 – 67.5). This date closely matches the ages of the last  
833 observed MIS 4 CladeX individuals across all sampled locations, supporting the idea  
834 of a population movement and contraction of wisent individuals towards a refugium  
835 during the warmer period of MIS 3 in Europe.

836

### 837 *Nuclear phylogeny from bovine SNP locus data*

838 Phylogenetic trees were inferred from nuclear locus data (see next section for  
839 information about the data sets). First, a phylogenetic tree of modern representatives  
840 of bovid species, and with sheep as an outgroup, was inferred from published 40,843  
841 data<sup>26</sup> (Supplementary Figure 7). Using RAxML v8.1.21<sup>45</sup>, the three characters  
842 (genotype states AA, AB and BB) from the BovineSNP50 chip were considered as  
843 different states in an explicit analogue of the General Time Reversible (GTR)  
844 substitution model, with separate substitution parameters for the three possible  
845 transformations. For all analyses, 20 maximum likelihood searches were conducted to

846 find the best tree, and branch support was estimated with 500 bootstrap replicates  
847 using the rapid bootstrapping algorithm<sup>46</sup>.

848 This species tree, estimated from genome-wide nuclear locus data, shows that the  
849 extant bison species (wisent and American bison) are sister taxa, contrary to the  
850 phylogenetic signal from the maternally inherited mitochondrial genome. This  
851 topology also clearly shows the paraphyletic status of the genus *Bos* (banteng, gaur,  
852 yak, zebu and cattle), as it also includes the genus *Bison* (wisent and American bison).

853

854 Using the same method, we reconstructed the phylogeny of bison with the inclusion  
855 of five pre-modern samples (for which the highest number of nuclear loci were called  
856 amongst the ~10k nuclear bovine SNPs). When only the two steppe bison specimens  
857 are included they form a sister-lineage to modern American bison (Supplementary  
858 Figure 8A). Similarly, when the steppe bison and pre-modern wisent (including  
859 ancient, historical and CladeX) are included, all five pre-modern specimens form a  
860 clade most closely related to American bison (Supplementary Figure 8C). However,  
861 when only the pre-modern wisent is included, the three specimens (ancient, historical  
862 and CladeX) form a clade that is most closely related to modern wisent  
863 (Supplementary Figure 8B). These conflicting results reflect the complex non-tree  
864 like relationships among the modern and pre-modern taxa, and are consistent with the  
865 hybridisation origin of wisent/CladeX and the severe bottleneck in the recent history  
866 of the wisent. Hence, we used population genomics statistics to study this nuclear  
867 locus dataset (see next section). Finally, these topologies are robust to the removal of  
868 transitions (see Supplementary Figure 8D), a minimum depth of 2 for variant calling,  
869 and haploidisation (data not shown).

870

### 871 **Genome wide nuclear locus analysis**

872 Captured nuclear loci corresponding to bovine SNPs for ancient samples were  
873 analysed with published genotypes from modern populations: 20 American bison  
874 were selected on the criterion that they do not display any detectable signal of recent  
875 introgression from cattle (unpublished data); 2 Yak (*Bos gruniens*); 10 water buffalo  
876 (*Bubalus bubalis*); and 10 Sheep (*Ovis aries*). Additionally, 7 modern wisent were  
877 selected (among 50 sequenced –<sup>47</sup>) as non-related individuals on a known five-  
878 generation pedigree (as shown in Supplementary Figure 9).

879

### 880 *Principal Component Analysis*

881

882 PCA (Figures 3A and S10) was performed using EIGENSOFT version 6.0.1<sup>48</sup>. In  
883 Figure 3A, CladeX sample A006 was used as the representative of CladeX, as this  
884 sample contained the most complete set of nuclear loci called at the bovine SNP loci  
885 (see Supplementary Table 2). Other CladeX individuals, as well as ancient wisent,  
886 cluster towards coordinates 0.0, 0.0 (see Supplementary Figure 10), most likely due to  
887 missing data.

888

### 889 *Topology testing with the D statistic*

890

891 For three bison populations, assuming two bifurcations and no hybridisations, there  
892 are three possible phylogenetic topologies. For this simple case, the D statistic is  
893 expected to be significantly different from zero for exactly two of the three topologies,  
894 and not significantly different from zero for the most parsimonious topology. We  
895 therefore calculate a D statistic<sup>49</sup> for each of these three topologies, using the sheep  
896 (*Ovis aries*) as an outgroup.

897 When D statistics for the set of three topologies do not indicate zero for one topology  
898 and non-zero for the other two, the true phylogeny is not treelike. However, the most  
899 parsimonious topology may still be apparent when considering only small amounts of  
900 introgression from populations of similar size. The interpretation of a most  
901 parsimonious tree topology is not valid where confidence intervals around the D  
902 statistic closest to zero, contain one or more of the other D statistics.

903 In this manner, the D statistic was used to indicate the most parsimonious topology  
904 for phylogenies including CladeX, ancient wisent, historical wisent, modern wisent,  
905 steppe bison and aurochs (Supplementary Figure 11). D statistics were calculated  
906 using ADMIXTOOLS version 3.0, git~3065acc5<sup>50</sup>.

907 Following concern over the limited amount of data for CladeX, particularly in  
908 samples other than 6A, we calculated the D statistics with sample 6A omitted from  
909 the analysis (Supplementary Figure 12). The most parsimonious topologies match in  
910 both cases.

911 Sensitivity to other factors were also investigated, such as setting a bovine SNP site  
912 coverage depth threshold of two (Supplementary Figure 13), changing the outgroup to  
913 *Bubalus bubalis* (Asian water buffalo, Supplementary Figure 14), and haploidisation  
914 by randomly sampling an allele at heterozygous sites (Supplementary Figure 15).  
915 None of these factors had notable influences on the outcome.

916 We also considered that the obtained topologies may have been caused by the small  
917 number of observed loci. To determine how sensitive the topology testing was  
918 missing data, we performed bootstrap resampling of the locus calls on decreasingly  
919 sized subsets of the data (Supplementary Table 7). For 10,000 bootstraps, we counted  
920 how often we obtained a result other than shown in Supplementary Figure 11.

921 For this bootstrap, a topology is considered to be simple if: (1) It has a D statistic  
922 which, uniquely amongst the set of three, is not significantly different from zero, or (2)  
923 All three are significantly different from zero but one has a D statistic closest to zero,  
924 with confidence intervals that do not overlap the D statistic for the other two  
925 topologies.

926 For simple topologies, we counted how often the bootstrap replicate suggested a  
927 simple topology that did not match the most parsimonious topology in Supplementary  
928 Figure 11. For non-simple topologies, we counted how often the result suggested any  
929 simple topology. In both cases, a lack of support for any simple topology (such as  
930 multiple topologies having a D statistic not significantly different from zero) was not  
931 counted.

932 This bootstrapping shows that the D statistics are robust to the small number of  
933 observed genotypes.

934

935

936 *Admixture proportion determination using an f4 ratio*

937

938 The proportion of the wisent's ancestry differentially attributable to the steppe bison  
939 and the aurochs, was estimated with AdmixTools using an f4 ratio, as described in <sup>50</sup>  
940 with sheep (*Ovis aries*) as the outgroup. For the admixture graph shown in  
941 Supplementary Figure 16, the admixture proportion,  $\alpha$ , is the ratio of two f4 statistics.

$$\alpha y = F_4(A, O; X, C)$$

$$y = F_4(A, O; B, C)$$

$$\alpha = \frac{\alpha y}{y} = \frac{F_4(A, O; X, C)}{F_4(A, O; B, C)}$$

942 For the estimation of admixture proportions using an f4 ratio, it is intended that the  
943 ingroup A, while closely related to B, has diverged from B prior to the admixture  
944 event. However, in the context of steppe ancestry for wisent, no such population  
945 matching ingroup A was available. The admixture graph for wisent is shown in  
946 Supplementary Figure 17.

$$\alpha y = F_4(\text{AmericanBison}, O; \text{Wisent}, \text{Aurochs})$$

$$x + y = F_4(\text{AmericanBison}, O; \text{Steppe}, \text{Aurochs})$$

$$\alpha \approx \frac{\alpha y}{x + y} = \frac{F_4(\text{AmericanBison}, O; \text{Wisent}, \text{Aurochs})}{F_4(\text{AmericanBison}, O; \text{Steppe}, \text{Aurochs})}$$

947 Where  $\alpha$  in Supplementary Figure 17 is approximately determined by the f4 ratio for  
948 small branch lengths  $x$ . The f4 ratio we calculate therefore represents a lower bound  
949 on the proportion of steppe bison present in the wisent populations. The steppe  
950 ancestry was found to be at least 0.891, with a standard error of 0.026 (Supplementary  
951 Table 6-A).

952 Sensitivity to haploidisation was checked by randomly sampling an allele at  
953 heterozygous sites (Supplementary Table 6-B), which had no notable influence on the  
954 outcome.

955

956 *Hypergeometric test for shared derived alleles*

957

958 To test whether the wisent lineages (including CladeX) have a common hybrid  
959 ancestry (Supplementary Figure 18A), or whether multiple independent hybridisation  
960 events gave rise to distinct wisent lineages (Supplementary Figure 18B), we identify  
961 nuclear loci which have an ancestral state in the aurochs lineage, but a derived state in  
962 the steppe lineage (see next section 'identification of derived alleles'). Under the  
963 assumption of a single hybrid origin, we expect a common subset of derived steppe  
964 alleles to be present in the various wisent lineages. In contrast, multiple hybridisation  
965 events would result in different subsets of derived steppe alleles being present in  
966 different wisent lineages. Likewise, we expect the subset of derived aurochs alleles to  
967 indicate either one, or multiple hybridisation events.

968 If the total number of derived steppe alleles is  $s$ , the number of derived steppe alleles  
969 observed in one wisent lineage is  $a$ , and the number in a second wisent lineage is  $b$ ,  
970 then under model B, the number of sites which are found to be in common is a  
971 random variable  $X \sim \text{HGeom}(a, s-a, b)$ . Where HGeom is the hypergeometric

972 distribution, having probability mass function:

$$P(X = k) = \frac{\binom{a}{k} \binom{s-a}{b-k}}{\binom{s}{b}}$$

973 For the number of derived steppe alleles in common between two wisent lineages,  $c$ ,  
974 we calculate  $P(X \geq c)$ . This indicates the likelihood of having observed  $c$  or more  
975 derived steppe alleles in common, if independent hybridisation events gave rise to  
976 both wisent and CladeX lineages.

977 Likelihoods were calculated for steppe derived alleles on all pairwise combinations of  
978 wisent lineages (Supplementary Table 8), and then repeated for derived aurochs  
979 alleles (Supplementary Table 9). This provides strong support for an ancestral  
980 hybridisation event occurring prior to the divergence of the wisent lineages.

981 We note that parallel genetic drift may also result in a pattern of alleles observed to be  
982 derived in the steppe lineage and the wisent lineages, however this is only a  
983 confounding factor where the parallel drift occurred in the post hybridisation lineage  
984 common to wisent and CladeX in Supplementary Figure 18A. Therefore, this only  
985 confounds the determination of genomic positions from a specific parent population,  
986 not that the wisent and CladeX lineages have shared ancestry post hybridisation.  
987 Alleles under strong selection following distinct hybridisation events would also be  
988 shared between lineages more often than if they were randomly distributed. We  
989 consider this situation unlikely, as it would require that the same alleles were  
990 randomly introgressed repeatedly, and then a strong selective advantage of the alleles  
991 at all times and in all environments.

992 Although we cannot reject the hypothesis that the modern European bison morph may  
993 be recent, and only appeared after the LGM as an adaptation to the Holocene  
994 environment in Europe, it would mean that the *Bos* mitochondrial lineage has been  
995 maintained in the steppe bison diversity throughout the late Pleistocene, and that only  
996 individuals carrying this mitochondrial lineage survived in Europe. Therefore, a  
997 hybrid origin of the European morph prior to 120 kyr, and maintained during the late  
998 Pleistocene, is more parsimonious with the current data.

999

#### 1000 *Identification of derived alleles*

1001

1002 The identification of a derived allele in the B lineage of Supplementary Figure 16, for  
1003 the above analysis, can be performed in a simple way. If the ancestral allele is fixed in  
1004 both C and the outgroup O, and the derived allele is fixed within B, then the site may  
1005 be readily identified as derived. However, such fixed alleles are likely to be rare,  
1006 especially in large populations, and therefore in limited number in our 10K SNP  
1007 subset. Furthermore, a steppe bison derived allele observed in a wisent population  
1008 may not be fixed in the wisent, as the population may also contain the ancestral allele  
1009 from the aurochs lineage.

1010 Relaxing the criterion of allele fixation in any lineage, we identify differential  
1011 ancestry using the difference in allele frequencies between populations. An ancestral  
1012 site is one in which the allele frequency closely matches that of the outgroup and a  
1013 derived site has an allele frequency differing from the outgroup.

1014 For the admixture graph in Supplementary Figure 16, where population X has  
 1015 ancestry from both B and C lineages, with outgroup O, we define an allele frequency  
 1016 shift in B, analogous to a derived state, if

$$1017 \hat{F}_2(C, O) < \hat{F}_2(X, C) \text{ and } \hat{F}_2(C, O) < \hat{F}_2(X, O),$$

1018 where  $\hat{F}_2(M, N)$  is an unbiased estimate of  $(m - n)^2$ , for populations M and N with  
 1019 population allele frequencies  $m$  and  $n$  at a single locus, as in Appendix A of<sup>50</sup>.  
 1020 Similarly, we define the allele frequency shift in B to have the same shift in X if, in  
 1021 addition to the shift in B:

$$1022 \hat{F}_2(B, X) < \hat{F}_2(B, C) \text{ and } \hat{F}_2(B, X) < \hat{F}_2(B, O) \text{ and}$$

$$1023 \hat{F}_2(B, X) < \hat{F}_2(X, C) \text{ and } \hat{F}_2(B, X) < \hat{F}_2(X, O) \text{ and}$$

$$1024 \hat{F}_2(C, O) < \hat{F}_2(B, C) \text{ and } \hat{F}_2(C, O) < \hat{F}_2(B, O).$$

1025 By observing a shared allele frequency shift instead of shared fixed alleles, we obtain  
 1026 greater sensitivity to the phylogenetic signal that is specific to one ancestral lineage.  
 1027 As for fixed derived alleles, the specific sites showing an allele frequency shift are  
 1028 identified, and can then be compared between multiple daughter populations.

1029

1030 *Admixture proportion determination using ABC and simulated data*

1031 As the f4 ratio test is giving an upper limit to the amount of aurochs introgression  
 1032 (due to the branch length uncertainty shown in Supplementary Figure 17), we  
 1033 independently test the admixture proportions using simulated data and an ABC  
 1034 approach.

1035 Approximate Bayesian Computation (ABC) is a likelihood-free methodology  
 1036 employed when calculating likelihood functions is either impossible or  
 1037 computationally expensive<sup>51</sup>. The methodology relies on being able to efficiently  
 1038 simulate data, and then compare simulated data to observed data. When simulated  
 1039 data is sufficiently close to the observed data, the parameters used to simulate the data  
 1040 are retained in a posterior distribution.

1041 Consider a single locus, which for three individuals A, B, and C, two different  
 1042 genotypes are observed. The three possible patterns that can be observed are AB, BC,  
 1043 and AC, denoted by the tree tips with shared state. The observed pattern results from a  
 1044 single mutation somewhere on the gene tree, where the position of the mutation  
 1045 relative to the internal node defines which pattern is observed. For example, from the  
 1046 un-rooted gene tree in Supplementary Figure 19c, if a mutation occurs on the branch  
 1047 between C and the internal node, the pattern AB is observed. We assume the relevant  
 1048 time scales are short enough that multiple mutations at a single locus are rare (infinite  
 1049 sites model<sup>52</sup>).

1050 Under the assumption of neutral and independent mutations, the number of fixed mu-  
 1051 tations accumulating on a branch is Poisson distributed with mean  $\mu \times t$ , where  $\mu$  is  
 1052 mutations per locus per generation, and time  $t$  is in units of  $2N_e$  generations<sup>53,54</sup>. The  
 1053 counts  $\mathbf{n} = (n_{ab}, n_{bc}, n_{ac})$ , of observed site patterns AB, BC, and AC, are random  
 1054 variables, which for topology  $X_1$  (Supplementary Figure 19c),

$$n_{ab} \sim \text{Pois}(T_m + T_c),$$

$$n_{bc} \sim \text{Pois}(T_a),$$

$$n_{ac} \sim \text{Pois}(T_b),$$

1055 and topology  $X_2$  (Supplementary Figure 19d),

$$n_{ab} \sim \text{Pois}(T_c),$$

$$n_{bc} \sim \text{Pois}(T_m + T_a),$$

$$n_{ac} \sim \text{Pois}(T_b),$$

1056 where  $\mathbf{T} = (T_a, T_b, T_c, T_m)$  are branch lengths in units of evolutionary time of  $2N_e\mu$   
 1057 generations, and the total number of observed patterns is  $N = n_{ab} + n_{bc} + n_{ac}$ . Thus  
 1058 for a locus where two genotypes are observed, the probability of patterns AB, BC,  
 1059 AC, is given by  $\mathbf{p}^T = (p_{ab}^T, p_{bc}^T, p_{ac}^T)$ , where for topology  $X_1$  (Supplementary Figure  
 1060 19c),

$$P(\text{AB}|\mathbf{T}, X_1) = p_{ab}^{T, X_1} = (T_m + T_c)/(T_m + T_c + T_a + T_b)$$

$$P(\text{BC}|\mathbf{T}, X_1) = p_{bc}^{T, X_1} = T_a/(T_m + T_c + T_a + T_b)$$

$$P(\text{AC}|\mathbf{T}, X_1) = p_{ac}^{T, X_1} = T_b/(T_m + T_c + T_a + T_b)$$

1061 and for topology  $X_2$  (Supplementary Figure 19d),

$$P(\text{AB}|\mathbf{T}, X_2) = p_{ab}^{T, X_2} = T_c/(T_m + T_c + T_a + T_b)$$

$$P(\text{BC}|\mathbf{T}, X_2) = p_{bc}^{T, X_2} = (T_a + T_m)/(T_m + T_c + T_a + T_b)$$

$$P(\text{AC}|\mathbf{T}, X_2) = p_{ac}^{T, X_2} = T_b/(T_m + T_c + T_a + T_b).$$

1062 We simulate site pattern counts for each of the two species trees in Supplementary  
 1063 Figure 19 by drawing from a Multinomial distribution, where for tree topology  $X_1$ ,  
 1064  $\mathbf{n}^{X_1} \sim \text{Mult}(N, \mathbf{p}^{T, X_1})$ , and for tree topology  $X_2$ ,  $\mathbf{n}^{X_2} \sim \text{Mult}(N, \mathbf{p}^{T, X_2})$ .

1065 Given a collection of site pattern counts from a hybrid tree with hybridisation  
 1066 parameter  $\gamma \in [0, 1]$  (Figure S19e), we expect that the combined site pattern counts  
 1067 will be a linear combination of the counts for the different topologies  $X_1$  and  $X_2$ . This  
 1068 assumption is reasonable for a large number of total observations  $N$ . The simulated  
 1069 counts,  $\mathbf{n}^\gamma$ , of site patterns for the hybridised tree is then given by

$$\begin{aligned} \mathbf{n}^\gamma &= \gamma \mathbf{n}^{X_1} + (1 - \gamma) \mathbf{n}^{X_2} \\ &= (n_{ab}^\gamma, n_{bc}^\gamma, n_{ac}^\gamma). \end{aligned}$$

1070 As branch lengths are not known ( $\mu$ ,  $N_e$  and number of generations are all unknown),  
 1071 we use uninformative priors for the branch lengths. Furthermore, we only require  
 1072 relative branch lengths, so branch lengths  $\mathbf{T}$  used for simulation were scaled such that  
 1073  $T_b = 1$ . Hence we can meaningfully simulate counts of site patterns  $\mathbf{n}^\gamma$  under  
 1074 hybridisation, for comparison to observed site pattern counts.

1075 We perform ABC using the R package ‘abc’, with a ridge regression correction for  
 1076 comparison of the simulated and observed data using the “abc” function<sup>55</sup>. The  
 1077 distance between the observed and simulated data sets is calculated as the Euclidean  
 1078 distance in three-dimensional space. A tolerance  $\epsilon = 0.005$  was chosen so that the  
 1079 closest  $\ell \times \epsilon$  simulated data sets are retained. For each analysis we had  $\ell = 100000$ ,  
 1080 resulting in 500 posterior samples.

1081 We performed leave-one-out cross-validation using the function “cv4abc” on  
 1082  $\ell' = 250$  randomly selected simulations, and report the prediction error, calculated as

$$E_{\text{pred}} = \frac{\sum_{i=1}^{\ell'} (\hat{\gamma}_i - \gamma_i)^2}{\text{Var}(\gamma_i)}$$

1083 for each analysis. At most the prediction error was 0.5111 standard deviations away  
 1084 from zero, and so we observe that the ridge regression has performed well (see  
 1085 Supplementary Table 11).

1086 Similarly, on inspection of the cross-validation plots, we observe that the ridge  
 1087 regression performs well for  $\gamma$ , as the true simulated values of  $\gamma$  are well estimated by  
 1088 the ridge regression correction. Hence the correction has strengthened the parameter  
 1089 inference methodology when compared to a simple rejection algorithm.

1090 We avoid reporting sample means due to the heavy negative skew in the posterior dis-  
 1091 tributions of  $\gamma$ , and hence report the median (the most central ordered observed value)  
 1092 and mode of each distribution. The mode is estimated using a kernel density estimate  
 1093 of the posterior distribution. Not all simulated data is equally ‘close’ to the observed  
 1094 data, and the median and mode are weighted according to these distances<sup>56</sup>.

1095 The weighted posterior median was between 0.8250 and 0.8660, and the weighted  
 1096 posterior mode was between 0.9034 and 0.9384. These measures of centre indicate  
 1097 evidence for some non-zero level of hybridisation from the Aurochs genome.  
 1098 Evidence against hybridisation must be indicated by overwhelming support for either  
 1099  $\gamma = 0$  or  $\gamma = 1$  (no mixing of the tree topologies). However, these values lie on either  
 1100 end of the support for the prior distribution of  $\gamma$ , and hence any resulting posterior  
 1101 distribution for  $\gamma$ . Therefore, classical highest probability density (HPD) intervals  
 1102 cannot be used to indicate uncertainty in the estimates of these measures of centre, as  
 1103 any interval of density less than 100% will result in zero and one being artificially  
 1104 omitted by construction. This is not evidence for or against hybridisation, but rather a  
 1105 consequence of the way in which we calculate HPD intervals.

1106 Supplementary Table 11 gives empirical posterior probabilities for different levels of  
 1107 hybridisation. For example, the first column gives the empirical posterior probability  
 1108 of observing at least 1% hybridisation. This is found for each trio by calculating the  
 1109 total proportion of posterior samples where  $0.01 \leq \gamma \leq 0.99$ . In general, for some  
 1110 percentage of hybridisation  $\alpha$ , Supplementary Table 11 reports

$$\left[ P\left(\frac{\alpha}{100} \leq \gamma \leq 1 - \frac{\alpha}{100}\right) \right]$$

1111 for  $\alpha = 1\%$ ,  $2\%$ ,  $3\%$ ,  $4\%$  and  $5\%$ , from the posterior distribution of  $\gamma$ .

1112 As there is no accepted value of  $\gamma$  for which we can claim that significant  
 1113 hybridisation has occurred, we leave it to the reader to consider what they consider to  
 1114 be a significant level of hybridisation, and to find the appropriate probability.  
 1115 However, if one considers 1% hybridisation to be significant, then the observed data  
 1116 indicates that the data has between a 95.80% and 97.20% chance of being from a  
 1117 hybridised topology. Similarly, if one considers 5% hybridisation to be significant,  
 1118 then the observed data has between a 76.40% and 85.00% chance of being from a  
 1119 hybridised topology.

1120



1121 **Asymmetrical hybridisation**

1122 In this study, we show that wisent and CladeX are of hybrid origin, certainly between  
1123 ancient aurochs and steppe bison forms. This is consistent with the population  
1124 structure of most bovids, where a single bull usually breeds with different females of  
1125 multiple generations. As explained in<sup>57</sup>, this usually results in asymmetrical  
1126 hybridization when males of one species (steppe bison here) dominate males of the  
1127 other species (aurochs here), therefore preferentially mating with female aurochs, as  
1128 well as their offspring, potentially over several generations. In addition, male F<sub>1</sub>  
1129 hybrids are usually sterile or sub-fertile, increasing the amount of steppe bison  
1130 genomic contribution to the offspring. As illustrated in Supplementary Figure 20,  
1131 after just a few generations, this mating process results in individuals that are  
1132 essentially steppe bison for their nuclear genome, but with an aurochs mitochondrial  
1133 genome (strictly maternally inherited), which is the result that we obtained from the  
1134 genotyping of historical and ancient wisent individuals (including CladeX).  
1135

1136 **Supplementary Note 3:**

1137 **Paleoenvironment reconstruction and stable isotope analyses in the Ural region**

1138

1139 The Urals are a well sampled region, with the highest number of genotyped bones  
1140 through time (Figure 5 and S22). We generated a convex hull based on geo-referenced  
1141 site locations for all genotyped ancient samples collected from the Urals  
1142 (Supplementary Figure 21). We used the HadCM3 global circulation model and  
1143 BIOME4 model to reconstruct paleoclimate and environmental conditions for the Ural  
1144 region throughout the period from 70,000 years ago to the present day.

1145

1146 We used the HadCM3 global circulation model to reconstructed paleoclimate proxies  
1147 for the Ural region. The HadCM3 consists of linked atmospheric, ocean and sea ice  
1148 models at a spatial resolution of 2.5° latitude and 3.75° longitude, resampled at a 1° x  
1149 1° latitude/longitude grid cell resolution<sup>58</sup>. The temporal resolution of the raw data is  
1150 1,000 year slices back to 22,000BP and 2,000 year slices from 22,000 to 80,000BP<sup>58</sup>  
1151 We used these palaeo-climate simulations to derive estimates of annual mean daily  
1152 temperature and Köppen-Geiger climate classifications<sup>59</sup> throughout the period from  
1153 70,000 years ago to the present day. We intersected each grid cell in the Ural study  
1154 region (n = 51) with the derived climate estimates, at each point in time, using  
1155 ArcGIS 10. We calculated the mean temperature for the region and change in the  
1156 proportion of the study region represented by four Köppen climate classes, each  
1157 differing temperature: Dfa (hot summers), Dfb (warm summers), Dfc (cool summers),  
1158 Dfd (continental temperatures). These are shown in Supplementary Figure 22.  
1159 Interestingly, our reconstructions for the Urals show a decrease in area with hot and  
1160 warm summer conditions (Dfa and Dfb) after 35kya.

1161

1162 BIOME4 was used to infer paleovegetation types. BIOME4 is a coupled  
1163 biogeographical and biogeochemical model that simulates the distribution of 28 plant  
1164 functional types (PFT) at a global scale<sup>60</sup>. Model inputs for each grid cell are monthly  
1165 climate (mean annual temperature, mean annual precipitation and mean annual  
1166 sunshine hours), atmospheric [CO<sub>2</sub>], and soil texture class. Ecophysiological  
1167 constraints determine which PFT is likely to occur in each grid cell. A coupled carbon  
1168 and water flux model calculates the leaf area index that maximizes net primary  
1169 production (in gC m<sup>-2</sup> year<sup>-1</sup>) for each PFT. Competition between PFTs was  
1170 simulated by using the optimal net primary production of each PFT as an index of  
1171 competitiveness. Global maps of BIOME4 PFTs were accessed at the same spatial  
1172 and temporal resolution as the paleoclimate data ([http://www.bridge.bris.ac.uk/  
resources/simulations/](http://www.bridge.bris.ac.uk/resources/simulations/)). We grouped PFTs into three categories: Grassland (PFT  
1174 identify numbers = 18-20); Tundra (ID = 22-26); and Forest (ID = 7-11). For each  
1175 grid cell in the Ural study region, at each point in time, we determined whether the  
1176 dominant PFT was grassland, tundra or forest. Interestingly the vegetation shift  
1177 between an all forest-like landscape to a landscape represented by a large proportion  
1178 of tundra and grassland-like vegetation occurred after 35kya, which coincides with a  
1179 decrease in hot and warm summer conditions (see above).

1180 These results from the paleovegetation and climate inferences agree with previous  
1181 landscape reconstructions of the region: In the Middle Urals, where almost all the  
1182 samplings sites were located, the areas covered with arboreal vegetation underwent

1183 changes during MIS3. Spruce and birch open forests were widespread during  
1184 coolings, and spruce and birch forest-steppe with occurrence of pine formed during  
1185 warmings. Mesophilic meadows dominated by forbs and grasses were also prevalent  
1186 during warm climatic events (Lapteva, 2008; 2009; Pisareva and Faustova, 2008). In  
1187 the south, where one of the sites (Gofmana) is situated, steppe landscapes dominated  
1188 by Asteraceae, Artemisia, and Poaceae were widespread. Spruce, birch and pine  
1189 forests covered the areas along the rivers (Smirnov, Bolshakov, Kosintsev et al.,  
1190 1990). The following was reconstructed for the territory of the Irtysh River: forest-  
1191 steppe landscapes with pine (*Pinus* s/g *Haploxyylon*) and spruce forests, as well as  
1192 meadows with a predominance of Cyperaceae and Poaceae and small quantities of  
1193 Artemisia and Chenopodiaceae (Araslanov *et al.* 2009).

1194 During MIS2, periglacial forest-steppes dominated by herbaceous communities were  
1195 typical of the Last Glacial Maximum. Larch, pine and birch covered the river-valleys.  
1196 Herbaceous vegetation was dominated by goosefoot, sagebrush and grass (Grichuk  
1197 2002). Periglacial forest-steppes with arboreal vegetation, including pine-birch forests  
1198 and small quantities of spruce have been reconstructed for the Last Glacial  
1199 Termination. Areas covered with sagebrush-goosefoot steppes with small quantities of  
1200 grass were widespread (Lapteva, 2007).

1201 At later stages of MIS2, periglacial forb-grass forest-steppes with pine, birch and  
1202 small quantities of spruce have been reconstructed for the Sur'ya 5 and Rasik 1 sites  
1203 <sup>61</sup>. Periglacial steppes dominated by Artemisia, Rosaceae, Chenopodiaceae,  
1204 Cichorioideae and Poaceae have been reconstructed for the Voronovka site. *Pinus*  
1205 *sylvestris* and *Betula pubescens* with occurrence of spruce (*Picea*), oak (*Quercus*) and  
1206 *tilia* covered the river-valleys <sup>62</sup>.

1207 The palynological analyses and landscape reconstruction suggest that both bison  
1208 forms inhabited semi-open landscapes of forest-steppe type, where arboreal  
1209 vegetation was represented by birch, spruce, pine and sometimes larch, while steppe  
1210 and meadow herbaceous communities were observed. However, only CladeX  
1211 (specifically from the Gofmana site, during MIS 3, Rasik 1 and Sur'ya 5, and  
1212 Voronovka sites, during MIS2) also inhabited steppe-like landscapes, showing a more  
1213 diverse ecological niche than steppe in this region.

1214 In addition to the paleo-climate and -vegetation reconstructions, stable isotope values  
1215 ( $\delta^{13}\text{C}$  and  $\delta^{15}\text{N}$ ) obtained for all the genotyped bison individuals from the Ural  
1216 region were compared between steppe bison and wisent (Supplementary Figure 23).  
1217 Wisent individuals displayed more diverse stable isotope ratios than the steppe bison  
1218 individuals. This observation is consistent with feeding in more diverse vegetations  
1219 communities, which correlates well with the reconstructed paleo-environments for the  
1220 region in the time periods they are found.

1221

1222 Modelled paleo-climate and -vegetation reconstruction at the sampling locations in  
1223 the southern Urals suggest drastic shifts, which coincide in time with the observed  
1224 population replacements between steppe bison and wisent. More specifically, between  
1225 14 and 31 kya wisent were likely to exist in environmental condition characterised by  
1226 relatively cold average temperatures, open landscapes with tundra-like flora, and the  
1227 absence of warm summers. Although modern wisent are found today in wood-like  
1228 habitats, it has been suggested that they are living in sub-optimal habitat, and  
1229 paleodiet reconstructions have placed ancient wisent in tundra-like environments, in  
1230 agreement with our observations <sup>63</sup>.

1231  
1232 Interestingly, the steppe bison was only recorded when forest vegetation was inferred  
1233 to dominate the landscape, adding to the evidence that this form of bison might not  
1234 have been exclusively steppe-adapted <sup>63,64</sup>.  
1235

1236 **Supplementary Note 4:**

1237 **Cave painting**

1238 The present survey, placing wisent across Europe (from the Urals/Caucasus to  
1239 Ukraine/Italy) during MIS2 and late MIS3, suggests that depictions of bison in  
1240 European Palaeolithic art, such as cave painting, carving and sculptures, are likely to  
1241 include representations of wisent. Paleolithic art representations have often been used  
1242 to infer the morphological appearance of steppe bison, sometimes in great detail  
1243 <sup>64,4,65-67</sup>. And until now, the steppe bison (i.e., direct ancestor of modern American  
1244 bison) has always been assumed to be the unique model present at the time of cave  
1245 painting, and therefore, the diversity within the representations of bison was mainly  
1246 explained by putative cultural and individual variations of style through time <sup>68-70</sup>.  
1247 However, in the vast diversity of bison representations (820 pictures representing  
1248 20.6% of all known cave ornamentation, according to <sup>71</sup>), two consistent  
1249 morphological types can be distinguished (see Fig 1 and Fig S24-27). The first type,  
1250 abundant prior to the last glacial maximum, is characterized by long horns (with one  
1251 curve), a very oblique dorsal line and a very robust front part of the body (solid  
1252 shoulders versus hindquarters), all these traits being similar to the modern American  
1253 bison. The second type, dominating the more recent paintings between 18 and 15 kya,  
1254 displays thinner sinuous horns (often with double curve), a smaller hump and more  
1255 balanced dimensions between the front and the rear of the body, similar to the modern  
1256 wisent lineage, and to some extant the *Bos* lineage. The imposing figure of the steppe  
1257 bison, with its high hump and long horns stepping out the head profile, certainly was a  
1258 very strong influence on the artists painting in the cave in Europe before the last  
1259 glacial maximum. However, later generations thoroughly depicted the slender shape  
1260 of the more recent form of bison. Considering the geographical and temporal  
1261 distribution of genotyped steppe bison and wisent presented here, particularly the  
1262 ~16,000 years old wisent B individual from Northern Italy, it is likely that the variety  
1263 of bison representations in Paleolithic art does not just come from stylistic evolution,  
1264 but actually represents different forms of bison (i.e., pre and post-hybridisation)  
1265 through time.  
1266

1267 **Supplementary References**

1268

- 1269 1. Wolff, E. W., Chappellaz, J., Blunier, T., Rasmussen, S. O. & Svensson, A.  
1270 Millennial-scale variability during the last glacial: The ice core record.  
1271 *Quaternary Science Reviews* **29**, 2828–2838 (2010).
- 1272 2. Shapiro, B. *et al.* Rise and Fall of the Beringian Steppe Bison. *Science* **306**, 1561–  
1273 1565 (2004).
- 1274 3. Leroi-Gourhan, A. & Allain, J. *Lascaux inconnu*. (CNRS, 1979).
- 1275 4. Capitan, L., Breuil, H. & Peyrony, D. *La caverne de Font-de-Gaume, aux Eyzies*  
1276 *(Dordogne)*. (Imprimerie du Chêne, 1910).
- 1277 5. Lorblanchet, M. *La grotte ornée de Pergouset (Saint-Géry, Lot). Un sanctuaire*  
1278 *secret paléolithique*. (Maison des Sciences de l’Homme, 2001).
- 1279 6. Barrière, C. L’art pariétal de Rouffignac, la grotte aux cent mammoths. *Bulletins*  
1280 *et Mémoires de la Société d’anthropologie de Paris* **10**, 144–145 (1983).
- 1281 7. Groves, C. & Grubb, P. *Ungulate Taxonomy*. (Johns Hopkins University Press,  
1282 2011).
- 1283 8. Drees, M. & Post, K. Bison bonasus from the North Sea, the Netherlands.  
1284 *Cranium* **24**, 48–52 (2007).
- 1285 9. Llamas, B. *et al.* High-Resolution Analysis of Cytosine Methylation in Ancient  
1286 DNA. *PLoS ONE* **7**, e30226 (2012).
- 1287 10. Skinner, A. R. *et al.* ESR dating at Mezmaiskaya Cave, Russia. *Applied Radiation*  
1288 *and Isotopes* **62**, 219–224 (2005).
- 1289 11. Pinhasi, R., Higham, T. F. G., Golovanova, L. V. & Doronichev, V. B. Revised  
1290 age of late Neanderthal occupation and the end of the Middle Paleolithic in the  
1291 northern Caucasus. *PNAS* **108**, 8611–8616 (2011).

- 1292 12. Reimer, P. J. *et al.* IntCal13 and Marine13 Radiocarbon Age Calibration Curves  
1293 0–50,000 Years cal BP. *Radiocarbon* **55**, 1869–1887 (2013).
- 1294 13. Willerslev, E. & Cooper, A. Ancient DNA. *Proc Biol Sci* **272**, 3–16 (2005).
- 1295 14. Brotherton, P. *et al.* Neolithic mitochondrial haplogroup H genomes and the  
1296 genetic origins of Europeans. *Nat Commun* **4**, 1764 (2013).
- 1297 15. Rohland, N. & Hofreiter, M. Ancient DNA extraction from bones and teeth. *Nat.*  
1298 *Protocols* **2**, 1756–1762 (2007).
- 1299 16. Meyer, M. & Kircher, M. Illumina Sequencing Library Preparation for Highly  
1300 Multiplexed Target Capture and Sequencing. *Cold Spring Harb Protoc* **2010**,  
1301 pdb.prot5448 (2010).
- 1302 17. Kircher, M., Sawyer, S. & Meyer, M. Double indexing overcomes inaccuracies in  
1303 multiplex sequencing on the Illumina platform. *Nucl. Acids Res.* **40**, e3–e3 (2012).
- 1304 18. Cone, R. W. & Schlaepfer, E. Improved In Situ Hybridization to HIV with RNA  
1305 Probes Derived from PCR Products. *J Histochem Cytochem* **45**, 721–727 (1997).
- 1306 19. Liu, C., Bernstein, B. & Schreiber, S. *DNA linear amplification*. (Scion Publishin  
1307 Ltd, 2005).
- 1308 20. Rohland, N. & Reich, D. Cost-effective, high-throughput DNA sequencing  
1309 libraries for multiplexed target capture. *Genome Res.* gr.128124.111 (2012).  
1310 doi:10.1101/gr.128124.111
- 1311 21. Konietzko, U. & Kuhl, D. A subtractive hybridisation method for the enrichment  
1312 of moderately induced sequences. *Nucleic Acids Res.* **26**, 1359–1361 (1998).
- 1313 22. Rohland, N., Harney, E., Mallick, S., Nordenfelt, S. & Reich, D. Partial uracil–  
1314 DNA–glycosylase treatment for screening of ancient DNA. *Philosophical*  
1315 *Transactions of the Royal Society of London B: Biological Sciences* **22**, 939–949  
1316 (2015).

- 1317 23. Haak, W. *et al.* Massive migration from the steppe was a source for Indo-  
1318 European languages in Europe. *Nature* **522**, 207–211 (2015).
- 1319 24. Maricic, T., Whitten, M. & Pääbo, S. Multiplexed DNA Sequence Capture of  
1320 Mitochondrial Genomes Using PCR Products. *PLoS ONE* **5**, e14004 (2010).
- 1321 25. Untergasser, A. *et al.* Primer3Plus, an enhanced web interface to Primer3. *Nucl.*  
1322 *Acids Res.* **35**, W71–W74 (2007).
- 1323 26. Decker, J. E. *et al.* Resolving the evolution of extant and extinct ruminants with  
1324 high-throughput phylogenomics. *PNAS* **106**, 18644–18649 (2009).
- 1325 27. Matukumalli, L. K. *et al.* Development and Characterization of a High Density  
1326 SNP Genotyping Assay for Cattle. *PLoS ONE* **4**, e5350 (2009).
- 1327 28. Shankaranarayanan, P. *et al.* Single-tube linear DNA amplification (LinDA) for  
1328 robust ChIP-seq. *Nat Meth* **8**, 565–567 (2011).
- 1329 29. Schubert, M. *et al.* Characterization of ancient and modern genomes by SNP  
1330 detection and phylogenomic and metagenomic analysis using PALEOMIX. *Nat.*  
1331 *Protocols* **9**, 1056–1082 (2014).
- 1332 30. Lindgreen, S. AdapterRemoval: Easy Cleaning of Next Generation Sequencing  
1333 Reads. *BMC Research Notes* **5**, 337 (2012).
- 1334 31. Li, H. & Durbin, R. Fast and accurate short read alignment with Burrows–  
1335 Wheeler transform. *Bioinformatics* **25**, 1754–1760 (2009).
- 1336 32. Jónsson, H., Ginolhac, A., Schubert, M., Johnson, P. L. F. & Orlando, L.  
1337 mapDamage2.0: fast approximate Bayesian estimates of ancient DNA damage  
1338 parameters. *Bioinformatics* **29**, 1682–1684 (2013).
- 1339 33. Zimin, A. V. *et al.* A whole-genome assembly of the domestic cow, *Bos taurus*.  
1340 *Genome Biology* **10**, R42 (2009).



- 1341 34. Li, H. A statistical framework for SNP calling, mutation discovery, association  
1342 mapping and population genetical parameter estimation from sequencing data.  
1343 *Bioinformatics* **27**, 2987–2993 (2011).
- 1344 35. Park, S. D. E. *et al.* Genome sequencing of the extinct Eurasian wild aurochs, *Bos*  
1345 *primigenius*, illuminates the phylogeography and evolution of cattle. *Genome*  
1346 *Biology* **16**, 234 (2015).
- 1347 36. Gouy, M., Guindon, S. & Gascuel, O. SeaView Version 4: A Multiplatform  
1348 Graphical User Interface for Sequence Alignment and Phylogenetic Tree  
1349 Building. *Mol Biol Evol* **27**, 221–224 (2010).
- 1350 37. Keane, T. M., Creevey, C. J., Pentony, M. M., Naughton, T. J. & McInerney, J. O.  
1351 Assessment of methods for amino acid matrix selection and their use on empirical  
1352 data shows that ad hoc assumptions for choice of matrix are not justified. *BMC*  
1353 *Evolutionary Biology* **6**, 29 (2006).
- 1354 38. Ronquist, F. *et al.* MrBayes 3.2: Efficient Bayesian Phylogenetic Inference and  
1355 Model Choice Across a Large Model Space. *Syst Biol* **61**, 539–542 (2012).
- 1356 39. Guindon, S. *et al.* New Algorithms and Methods to Estimate Maximum-  
1357 Likelihood Phylogenies: Assessing the Performance of PhyML 3.0. *Syst Biol* **59**,  
1358 307–321 (2010).
- 1359 40. Drummond, A. J. & Rambaut, A. BEAST: Bayesian evolutionary analysis by  
1360 sampling trees. *BMC Evolutionary Biology* **7**, 214 (2007).
- 1361 41. Minin, V. N., Bloomquist, E. W. & Suchard, M. A. Smooth Skyride through a  
1362 Rough Skyline: Bayesian Coalescent-Based Inference of Population Dynamics.  
1363 *Mol Biol Evol* **25**, 1459–1471 (2008).
- 1364 42. Drummond, A. J., Ho, S. Y. W., Phillips, M. J. & Rambaut, A. Relaxed  
1365 Phylogenetics and Dating with Confidence. *PLoS Biol* **4**, e88 (2006).

- 1366 43. Shapiro, B. *et al.* A Bayesian Phylogenetic Method to Estimate Unknown  
1367 Sequence Ages. *Mol Biol Evol* **28**, 879–887 (2011).
- 1368 44. Ho, S. Y. W. *et al.* Bayesian Estimation of Substitution Rates from Ancient DNA  
1369 Sequences with Low Information Content. *Syst Biol* **60**, 366–375 (2011).
- 1370 45. Stamatakis, A. RAxML-VI-HPC: maximum likelihood-based phylogenetic  
1371 analyses with thousands of taxa and mixed models. *Bioinformatics* **22**, 2688–2690  
1372 (2006).
- 1373 46. Stamatakis, A., Hoover, P. & Rougemont, J. A Rapid Bootstrap Algorithm for the  
1374 RAxML Web Servers. *Syst Biol* **57**, 758–771 (2008).
- 1375 47. Pertoldi, C. *et al.* Phylogenetic relationships among the European and American  
1376 bison and seven cattle breeds reconstructed using the BovineSNP50 Illumina  
1377 Genotyping BeadChip. *Acta Theriol* **55**, 97–108 (2010).
- 1378 48. Patterson, N., Price, A. L. & Reich, D. Population Structure and Eigenanalysis.  
1379 *PLoS Genet* **2**, e190 (2006).
- 1380 49. Durand, E. Y., Patterson, N., Reich, D. & Slatkin, M. Testing for Ancient  
1381 Admixture between Closely Related Populations. *Mol Biol Evol* **28**, 2239–2252  
1382 (2011).
- 1383 50. Patterson, N. *et al.* Ancient Admixture in Human History. *Genetics* **192**, 1065–  
1384 1093 (2012).
- 1385 51. Beaumont, M. A., Zhang, W. & Balding, D. J. Approximate Bayesian  
1386 Computation in Population Genetics. *Genetics* **162**, 2025–2035 (2002).
- 1387 52. Kimura, M. The Number of Heterozygous Nucleotide Sites Maintained in a Finite  
1388 Population Due to Steady Flux of Mutations. *Genetics* **61**, 893–903 (1969).
- 1389 53. Watterson, G. A. On the number of segregating sites in genetical models without  
1390 recombination. *Theor Popul Biol* **7**, 256–276 (1975).

- 1391 54. Hudson, R. in *Oxford Surveys in Evolutionary Biology* **7**, 1–44 (Oxford  
1392 University Press, 1990).
- 1393 55. Csilléry, K., François, O. & Blum, M. G. B. abc: an R package for approximate  
1394 Bayesian computation (ABC). *Methods in Ecology and Evolution* **3**, 475–479  
1395 (2012).
- 1396 56. Blum, M. G. B. & François, O. Non-linear regression models for Approximate  
1397 Bayesian Computation. *Stat Comput* **20**, 63–73 (2009).
- 1398 57. Groves, C. Current taxonomy and diversity of crown ruminants above the species  
1399 level. *Zitteliana* **B 32**, 5–14 (2014).
- 1400 58. Singarayer, J. S. & Valdes, P. J. High-latitude climate sensitivity to ice-sheet  
1401 forcing over the last 120 kyr. *Quaternary Science Reviews* **29**, 43–55 (2010).
- 1402 59. Peel, M. C., Finlayson, B. L. & McMahon, T. A. Updated world map of the  
1403 Köppen-Geiger climate classification. *Hydrol. Earth Syst. Sci.* **11**, 1633–1644  
1404 (2007).
- 1405 60. Kaplan, J. O. *Geophysical Applications of Vegetation Modeling*. (Lund  
1406 University, 2001).
- 1407 61. Lapteva, E. G. Landscape-climatic changes on the eastern macroslope of the  
1408 Northern Urals over the past 50000 years. *Russ J Ecol* **40**, 267–273 (2009).
- 1409 62. Lapteva, E. G. & Korona, O. M. Holocene vegetation changes and anthropogenic  
1410 influence in the forest-steppe zone of the Southern Trans-Urals based on pollen  
1411 and plant macrofossil records from the Sukharysh cave. *Veget Hist Archaeobot*  
1412 **21**, 321–336 (2011).
- 1413 63. Bocherens, H., Hofman-Kamińska, E., Drucker, D. G., Schmölcke, U. &  
1414 Kowalczyk, R. European Bison as a Refugee Species? Evidence from Isotopic

- 1415 Data on Early Holocene Bison and Other Large Herbivores in Northern Europe.  
1416 *PLoS ONE* **10**, e0115090 (2015).
- 1417 64. Guthrie, R. D. *Frozen fauna of the Mammoth Steppe : the story of Blue Babe*.  
1418 (University of Chicago Press, 1990).
- 1419 65. Bandi, H.-G. ; H., W. ;. Sauter, M. R. ;. Sitter, B. *La Contribution de la Zoologie*  
1420 *et de L'Ethologie a L'Interpretation de L'Art des Peuples Chasseurs*  
1421 *Prehistoriques*. (Editions Universitaires, 1984).
- 1422 66. Guthrie, R. D. *The nature of Paleolithic art*. (University of Chicago Press, 2005).
- 1423 67. Paillet, P. *Le bison dans les arts magdaléniens du Périgord*. (CNRS éd, 1999).
- 1424 68. Breuil, H. *Quatre cents siècles d'art pariétal; les cavernes ornées de l'âge du*  
1425 *renne*. (Centre d'études et de documentation préhistoriques, 1952).
- 1426 69. Leroi-Gourhan, A. *Préhistoire de l'art occidental*. (1965).
- 1427 70. Petrognani, S. *De Chauvet à Lascaux: l'art des cavernes, reflet de sociétés*  
1428 *préhistoriques en mutation*. (Editions Errance, 2013).
- 1429 71. Sauvet, G. & Wlodarczyk. L'art pariétal, miroir des sociétés paléolithiques.  
1430 *Zephyrus: Revista de prehistoria y arqueología* **53**, 217–240 (2000).
- 1431  
1432
- 1433 References in Russian:
- 1434 Arslanov KH, Laukhin SA, Maksimov FE, *et al.* (2009) Radiocarbon Chronology and  
1435 Landscapes of Western Siberian Lipovsk-Novoselovsky Interstadial (on evidence  
1436 of study section near V. Lipovka) // Fundamental Problems of Quaternary:  
1437 Resultats and Trends of Further Researches. (Ed. A.E. Kantorovich). Novosibirsk.  
1438 P. 44 – 47. (in Russian).
- 1439 Grichuk VP (2002) Vegetation of the Late Pleistocene. In: A.A.Velichko (ed.),  
1440 Dynamics of terrestrial landscape components and inner marine basins of  
1441 Northern Eurasia during the last 130 000 years. Moscow: GEOS Publishers, pp.  
1442 64-88. (in Russian).
- 1443 Lapteva EG (2007) Реконструкция ландшафтно-климатических изменений на  
1444 территории Среднего Зауралья в позднеледниковье и голоцене на основе  
1445 палинологических данных из рыхлых отложений пещеры Першинская-1 //  
1446 Экология древних и традиционных обществ. Вып. 3. (Ред. Н.П. Матвеева). С.  
1447 30 – 36. (in Russian).

- 1448 Lapteva EG (2008) Major palaeogeographical stages and specific landscape-climatic  
1449 changes on the eastern slope of the Urals during the last 50 kyrs (inferred from  
1450 palynological data) // Problems of Pleistocene palaeogeography and stratigraphy.  
1451 (Eds. N.S. Bolikhovskaya and P.A. Kaplin). Vol. 2. P. 196 – 204. (in Russian).  
1452 Pisareva VV, Faustova MA (2008) Reconstruction of Landscapes of Northern Russia  
1453 during the Middle Valday Mega-Interstadial // Way to North: Paleoenvironment  
1454 and Inhabitants of Arctic and Subarctic (Eds. A.A. Velichko and S.A. Vasil'ev).  
1455 Moscow.P. 53 – 62. (in Russian).  
1456  
1457  
1458
